# Supplementary material for: Enabling synthesis in fragment-based drug discovery (FBDD): microscale high-throughput optimisation of the medicinal chemist's toolbox reactions
Source: Royal Society of Chemistry journal article supplement (doi:10.1039/d3md00495c), 2023-01-01
Supplement: d3md00495c1.pdf [file d3md00495c1.pdf]

# Enabling Synthesis in Fragment-based Drug Discovery (FBDD): Microscale High-throughput Optimisation of the Medicinal Chemist's Toolbox Reactions

Chloe Townley, Davide Branduardi, Gianni Chessari, Benjamin D. Cons, Charlotte Griffiths-Jones, Richard J. Hall,  
Christopher N. Johnson, Yuji Ochi, Stuart Whibley, and Rachel Grainger\*

*Astex Pharmaceuticals, 436 Cambridge Science Park, Milton Road, Cambridge, CB4 0QA.*

|                                                                                |    |
|--------------------------------------------------------------------------------|----|
| General Experimental Information.....                                          | 1  |
| Equipment used in this study .....                                             | 2  |
| Chronect Quantos, Mettler-Toledo balance and dosing heads.....                 | 2  |
| Aluminium reaction blocks, glass vials, stir bars and stir bar dispenser ..... | 4  |
| Validation work for screening kits .....                                       | 5  |
| Selection of glass bead size .....                                             | 5  |
| Dosing accuracy inorganic bases .....                                          | 6  |
| Pd-ChemBead preparation .....                                                  | 7  |
| Dosing accuracy Pd-ChemBeads.....                                              | 8  |
| Glass bead spacers.....                                                        | 9  |
| Reaction solvent evaporation.....                                              | 10 |
| Comparing Pd-ChemBeads to pure Pd-catalysts .....                              | 11 |
| Astex preferred reaction conditions from electronic lab notebook (ELN) .....   | 12 |
| Suzuki-Miyaura cross-coupling .....                                            | 12 |
| Buchwald-Hartwig Amination.....                                                | 14 |
| S <sub>N</sub> Ar.....                                                         | 16 |
| Screening plate information .....                                              | 17 |
| Kit prep .....                                                                 | 17 |
| Suzuki-Miyaura screening kit.....                                              | 18 |
| Buchwald Primary amine screening kit .....                                     | 19 |
| Buchwald Secondary amine and aniline screening kit.....                        | 20 |
| Buchwald amide and oxygen screening kit.....                                   | 21 |
| S <sub>N</sub> Ar screening kit .....                                          | 22 |
| Setting up the screening kits .....                                            | 23 |
| Creation of the analytical plates for MISER .....                              | 23 |

|                                                                                                                                                       |    |
|-------------------------------------------------------------------------------------------------------------------------------------------------------|----|
| Suzuki-Miyaura Cross-coupling screening plate; 5-bromo-1H-pyrrolo[2,3-b]pyridine and (2-fluorophenyl)boronic acid .....                               | 25 |
| Buchwald primary amine screening plate (unhindered primary amine); 5-bromo-1H-pyrrolo[2,3-b]pyridine and 1-(pyridin-4-yl)methanamine .....            | 26 |
| Buchwald primary amine screening plate (hindered primary amine); 5-bromoisoquinoline and 2-phenylpropan-2-amine .....                                 | 27 |
| Buchwald secondary amine / aniline screening plate (secondary amine); 5-bromo-1H-pyrrolo[2,3-b]pyridine and tert-butyl piperazine-1-carboxylate ..... | 28 |
| Buchwald secondary amine / aniline screening plate (aniline); 5-bromo-1H-pyrrolo[2,3-b]pyridine and 5-methoxypyridin-2-amine .....                    | 29 |
| Buchwald amide and oxygen screening kit (amide); 1-bromo-4-methoxybenzene and pyridine-3-carboxamide .....                                            | 30 |
| Buchwald amide and oxygen screening kit (oxygen); 6-chloroquinoline and tert-butyl 3-hydroxyazetidine-1-carboxylate .....                             | 31 |
| SNAr screening plate: .....                                                                                                                           | 32 |
| Batch scale-up reactions and characterization data .....                                                                                              | 33 |
| 5-(2-fluorophenyl)-1H-pyrrolo[2,3-b]pyridine ( <b>3</b> ).....                                                                                        | 33 |
| <i>N</i> -[(pyridin-4-yl)methyl]-1H-pyrrolo[2,3-b]pyridin-5-amine ( <b>4</b> ) .....                                                                  | 34 |
| <i>N</i> -(2-phenylpropan-2-yl)isoquinolin-5-amine ( <b>5</b> ) .....                                                                                 | 35 |
| 5-methoxy- <i>N</i> -{1H-pyrrolo[2,3-b]pyridin-5-yl}pyridin-2-amine ( <b>10</b> ).....                                                                | 37 |
| <i>N</i> -(4-methoxyphenyl)pyridine-3-carboxamide ( <b>11</b> ).....                                                                                  | 38 |
| methyl 7-(benzyloxy)-1H-indazole-4-carboxylate ( <b>15</b> ) .....                                                                                    | 40 |
| Experimental References.....                                                                                                                          | 40 |
| NMR spectra .....                                                                                                                                     | 41 |
| Tabulated MISER data: .....                                                                                                                           | 50 |
| Suzuki-Miyaura screening kit.....                                                                                                                     | 50 |
| Buchwald-Hartwig primary amine screening kit (primary amine).....                                                                                     | 55 |
| Buchwald-Hartwig primary amine screening plate (sterically hindered primary amine) .....                                                              | 60 |
| Buchwald-Hartwig secondary amine and aniline screening kit (secondary amine) .....                                                                    | 67 |
| Buchwald secondary amine and aniline screening kit (aniline) .....                                                                                    | 73 |
| Buchwald amide and oxygen screening kit (amide) .....                                                                                                 | 78 |
| Buchwald amide and oxygen screening kit (oxygen).....                                                                                                 | 83 |
| S <sub>N</sub> Ar screening kit .....                                                                                                                 | 89 |

## General Experimental Information

Millimolar scale reactions carried out in Analytical Sales 96 well Para-dox<sup>®</sup> Aluminium Reaction Blocks with 1 mL glass vials containing stirrer bars. Reactions were performed with exclusion of air, unless otherwise stated. This was achieved by using solvent that had been sparged with N<sub>2</sub> for 15 mins and by purging the headspace of the reaction vial with a positive pressure of N<sub>2</sub> and an outlet needle. Commercial solvents and reagents were used without further purification.

Flash column chromatography was performed on a Biotage SP1 system; normal-phase chromatography performed with silica Sfar columns (32–63 μm particle size, KP-Sil, 60 Å pore size) and the stated solvent system (n.b. Petrol refers to Petroleum Ether bp 40–60 °C).

MISER Acquisition: Reversed phase HPLC experiments were performed on an Agilent 1290 Infinity II system. The Agilent stack was comprised a G7120A high speed pump, G7167B multisampler, G7116B multicolumn thermostat, G7117B diode array detector and a 6135 Quadrupole LC/MSD XT detector with multimode ionization. The system was controlled by OpenLab CDS Chemstation Edition software, with the FIA mode enabled. Separations were carried out on a 2.0 mm i.d. by 30 mm length, 1.9 μm YMC-Triart C18 column by isocratic elution at a flow rate of 1.5 mL/min. The LC eluents were 16% solvent A (10 mM ammonium acetate in H<sub>2</sub>O, pH 6.8) and 84% solvent B (acetonitrile). The column was maintained at a temperature of 40 °C. The MISERgrams were obtained from continuous sample injections (0.5 μL) every 12.5s. The multimode ESI+APCI parameters were fragmentor 60 V, desolvation gas (N<sub>2</sub>) temperature 350 °C and flow rate 12 L/min, vaporizer temperature 250 °C, the nebulizer was adjusted to 35 psi, the capillary voltage to 3000 V and the corona current to 1μA.

Batch reactions were monitored by LC-MS using an Agilent 1290 Infinity II series UHPLC coupled to an Agilent 6130 single quadrupole mass detector, eluting a gradient of 3-95% (MeCN in H<sub>2</sub>O, 0.1% HCO<sub>2</sub>H modifier) over 0.93 minutes run on a YMC-Triart C18 50x2.0mm 1.9μm column controlled at 40 °C, or a Shimadzu Nexera UHPLC coupled to a Shimadzu LCMS-2020 single quadrupole mass detector. High resolution mass spectrometry was performed on an Agilent 6550 QTOF mass spectrometer.

NMR spectra were recorded on a Bruker AV400 (Avance 400 MHz) spectrometer. Chemical shifts for <sup>1</sup>H and <sup>13</sup>C NMR spectra are reported as δ in units of parts per million (ppm) and quoted to the nearest 0.01 ppm relative to the residual protons in CDCl<sub>3</sub> (7.26 ppm, 77.16 ppm), d<sub>6</sub>-DMSO (2.50 ppm, 39.52 ppm) or CD<sub>3</sub>OD (3.31 ppm, 49.00 ppm). Coupling constants (J) are quoted in Hertz (Hz) and are reported to the nearest 0.1 Hz, with multiplicity reported according to the following convention: s = singlet, d = doublet, t = triplet, q = quartet, m = multiplet, br = broad and associated combinations e.g., dd = double of doublets. DEPT 135 and 2-dimensional experiments (COSY, HMBC, HSQC and ROESY) were used to support assignments and are reported where appropriate.

## Equipment used in this study

### Chronect Quantos, Mettler-Toledo balance and dosing heads

All solid dosing was achieved using the Chronect Quantos platform from Axel Semrau. The platform utilises a Mettler-Toledo balance system coupled with a Universal Robots UR3 cobot, which is a 6-axis robotic arm capable of transporting vials, dosing heads and balance adaptors. Up to 32 solids may be stored in dosing heads which are held in a rack at the back of the platform and all data pertaining to the solids is stored in an RFID tag which can be read by the balance. Finally, the Chronect Quantos is equipped with a three-position deck capable of holding the analytical sales Para-dox aluminium reaction blocks.

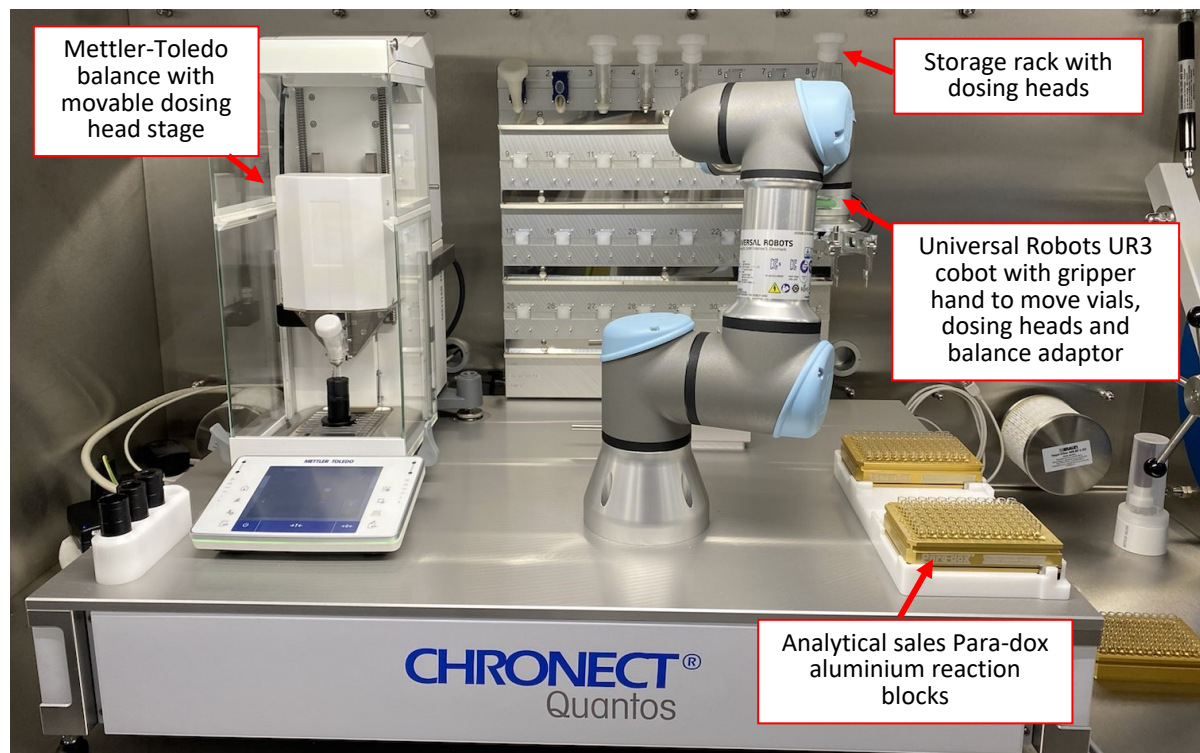

Figure S1: A photograph of our Chronect Quantos platform, with all the components highlighted, featuring a Mettler-Toledo balance, Universal Robots UR3 and analytical sales Para-dox aluminium reaction blocks.

There are several commercially available dosing heads available to purchase through Mettler-Toledo. The three investigated in this work for their compatibility with our Chronect Quantos and ChemBead selection can be seen below (figure S2). The so called 'normal' dosing head (QH012-LNMW) is a standard dosing head for up to 125 mL of material with a 2.5 mm dosing pin diameter. The antistatic dosing head (QH010-CNMW) is a standard dosing head with a 2.5 mm dosing pin diameter. The final dosing head investigated is a 'Pinocchio' dosing head (QH008-BNMP), so called as it has a 1mm nose which extends into the top of the vial while the substance is dispensed. This dosing head also has a 2.5 mm dosing pin diameter.

Table S1: The components, suppliers and serial numbers required to assemble the screening kits.

| Supplier                                    | Component                                                                 | Serial number      |
|---------------------------------------------|---------------------------------------------------------------------------|--------------------|
| Analytical Sales                            | 96-Well Parallel Synthesis/Optimization Block Assembly                    | 96960              |
|                                             | Replacement PFA Films for 96-Well Blocks                                  | 96967              |
|                                             | Replacement Rubber Mats for 96-Well Block Assemblies                      | 96965              |
|                                             | Stackable Tray with 8x30 Shell Vials                                      | 884001             |
|                                             | Stir Bars for Photoredox & Parallel Synthesis (gold) Block Systems        | 13258              |
| Thistle Scientific (formally VP Scientific) | Drop Dispenser, for VP 711 series Tumble Stir Elements                    | VPS-VP711A-96-AS-1 |
| Sigma-Aldrich                               | Glass beads, acid-washed, $\leq 106 \mu\text{m}$ ( $\sim 140$ U.S. sieve) | G4649              |
|                                             | Glass beads, acid-washed, 150-212 $\mu\text{m}$ (70-100 U.S. sieve)       | G1145              |

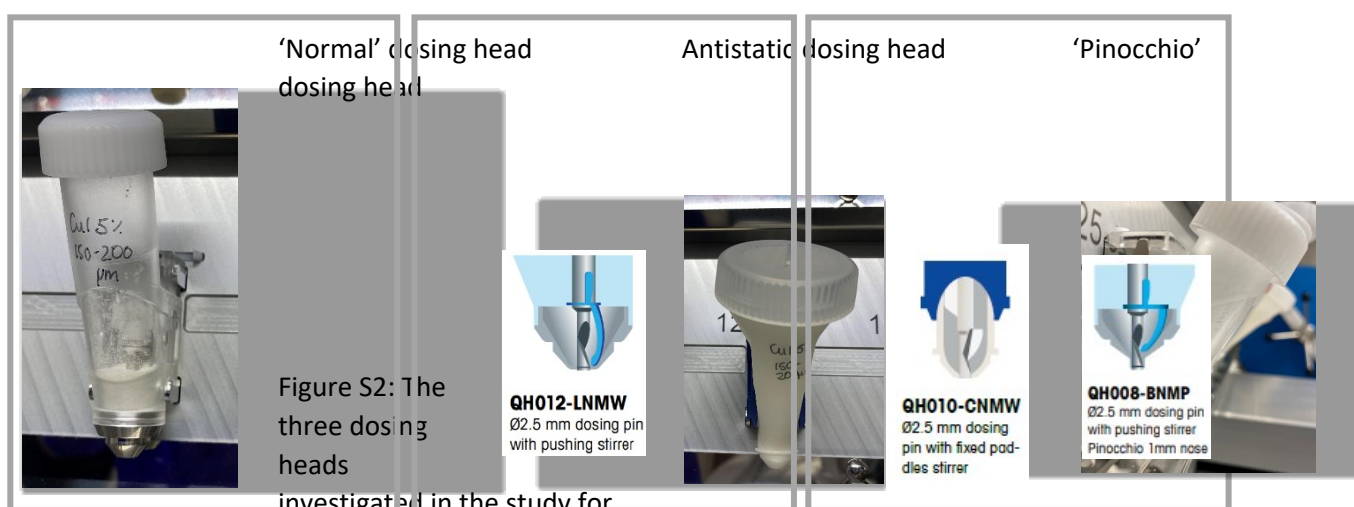

their compatibility with our Chronect Quantos and chembead selection. The dosing heads include the 'normal' dosing head (QH012-LNMW), antistatic dosing head (QH010-CNMW) and the 'Pinocchio' dosing head (QH008-BNMP).

Aluminium reaction blocks, glass vials, stir bars and stir bar dispenser

The consumable components for the screening kits can be seen below (figure S3). Analytical sales Para-dox blocks are loaded with 1 mL glass vials (884001). Stir bars (13258) are loaded into every vial using a Drop Dispenser (VPS-VP711A-96-AS-1). Finally, two rubber mats and a new PFA film are added to the lid. A table of the components, suppliers and serial numbers can be found below.

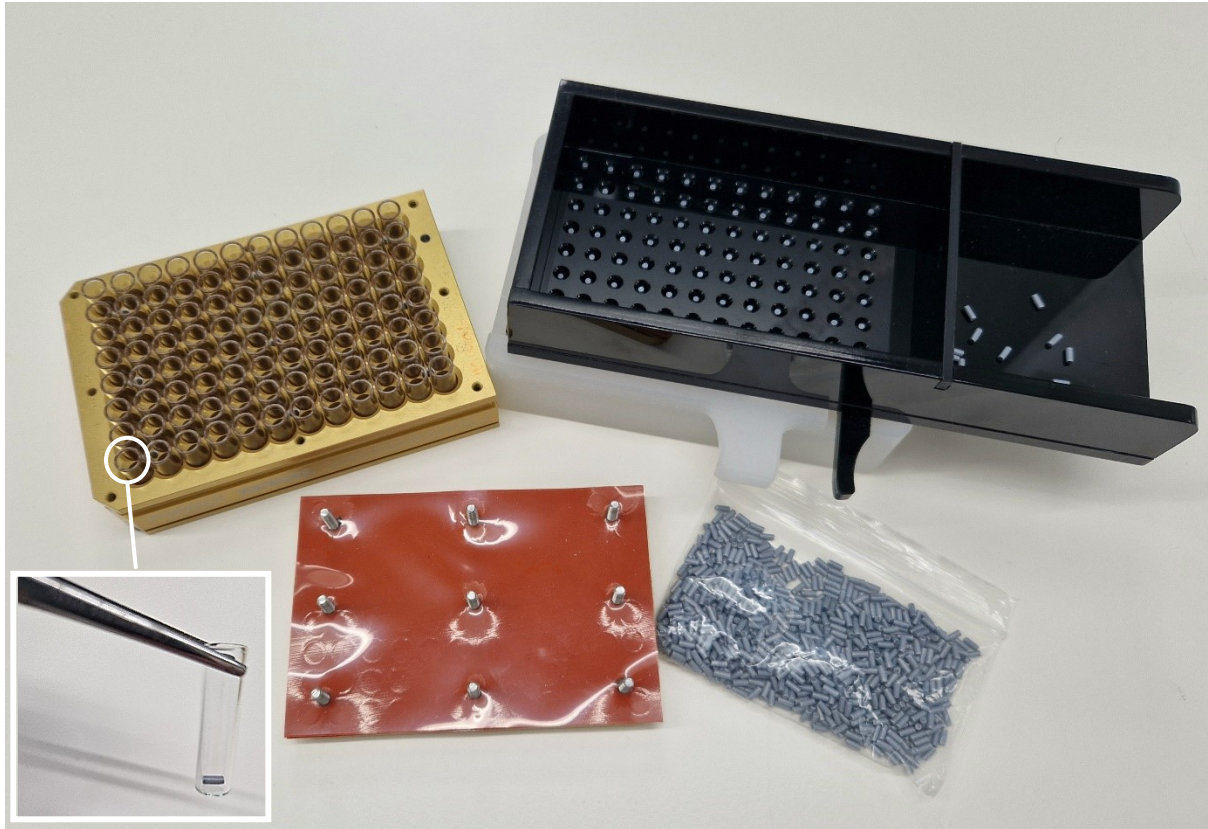

Figure S3: The consumable components used to facilitate the production of the screening kits. An Analytical sales Para-dox plate loaded with 1 mL glass vials containing a stir bar and the lid with a new PFA film in place.

## Validation work for screening kits

### Selection of glass bead size

Multiple glass bead sizes were available from Sigma, we investigated 150-212  $\mu\text{m}$  (G1145) and  $\leq 106$   $\mu\text{m}$  (G4649) in two types of dosing head to start with, the 'normal' dosing head (QH012-LNMW) and the antistatic dosing head (QH010-CNMW). Initially, when coated in a test substrate (Copper Iodide) it appears the smaller glass beads are generally dosed more accurately (figure S4).

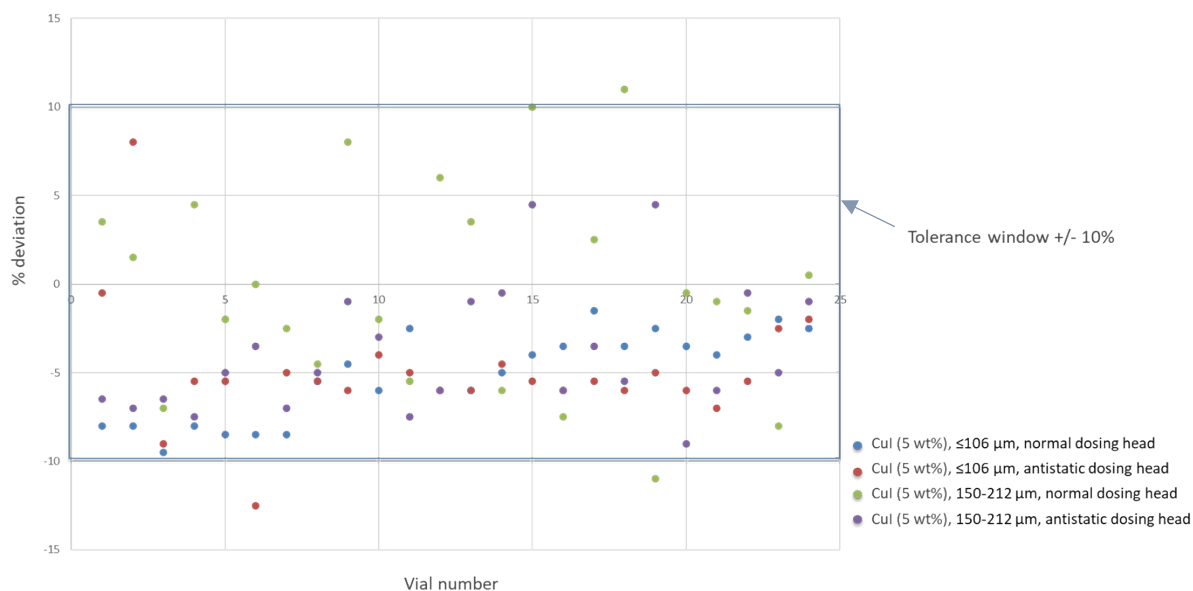

Figure S4: Dosing test to assess the suitability of CuI-ChemBeads, with a 1 mg target weight per dose. Here the percentage deviation (the % over the target dose) is plotted for every vial dosed. Each combination was dosed into 24 (two rows) of glass vials. The blue box denotes the pre-set tolerance window ( $\pm 10\%$ ) on the Chronect Chronos software. Even on a small scale, dosing is constant and largely within the window of  $\pm 10\%$  deviation.

### Dosing accuracy inorganic bases

Inorganic bases were milled to a fine powder prior to use in a Resodyn Acoustic Mixer LabRAM1, using stainless steel milling beads [Fisherbrand™ Bulk Beads; 15505809], and the protocol described by Abbvie<sup>1</sup>. Representative pictures of milled bases are shown below, beads were removed afterwards with a PTFE stir bar retriever. Some clumping is observed with hygroscopic bases, prior to use these bases are dried in a heated vacuum desiccator and stored in a glovebox. No visible difference observed between 10 and 20 mins.

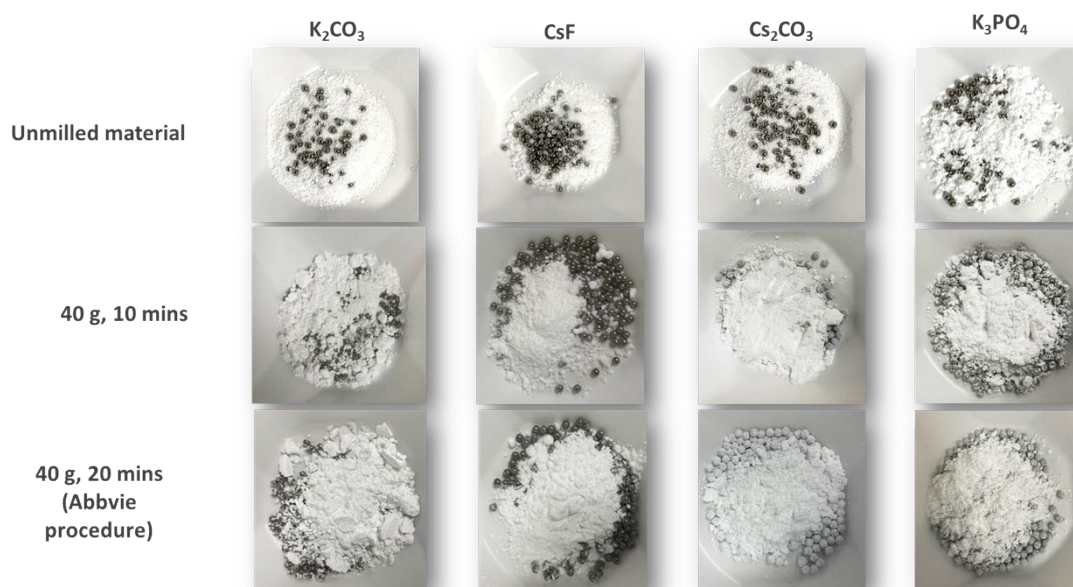

Figure S5: Photograph comparison of four different inorganic bases ( $K_2CO_3$ , CsF,  $Cs_2CO_3$  and  $K_3PO_4$ ) before milling, and after milling at 40 g for 10 mins and 40 g for 20 mins.

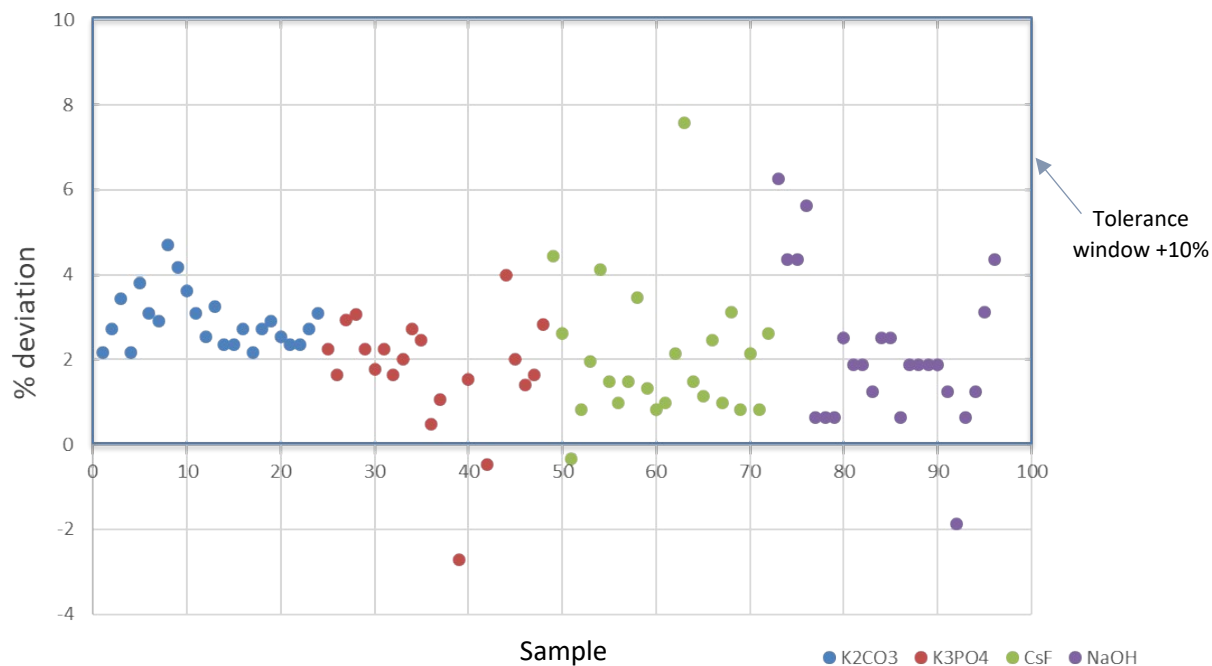

Figure S6: Assessing the dosing accuracy of milled inorganic bases with repeated dosing of  $K_2CO_3$  (2.76 mg),  $K_3PO_4$  (4.25 mg), CsF (3.04 mg), NaOH (0.80 mg). Even on a small scale, dosing is remarkably constant and largely within a window of 10% deviation.



### Pd-ChemBead preparation

Palladium catalysts were not milled prior to glass bead coating as milling caused the catalyst powders to adhere to the sides of the glass vials. If catalyst powders are gritty or clumpy, milling beads can be added to the vials during the coating process.

Compared to the procedure reported by AbbVie<sup>1</sup>, a modified procedure was used.

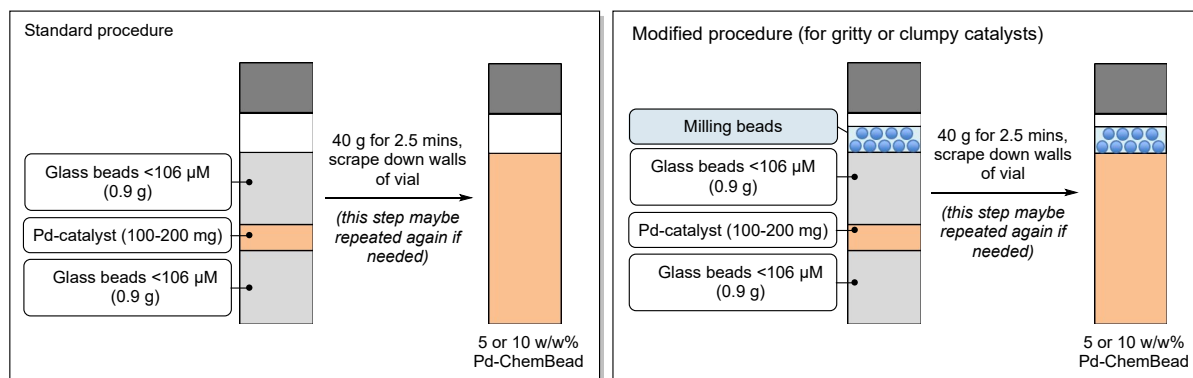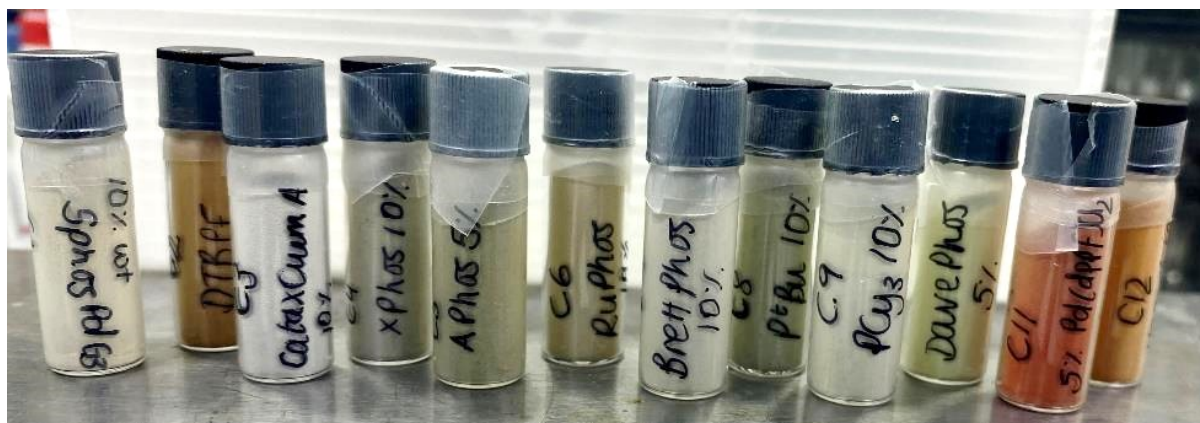

Figure S7: A schematic detailing the procedure used to make the Pd-coated ChemBeads and a photograph of the ChemBeads prepared for the Suzuki-Miyaura screening kit.

<sup>1</sup> Noah P. Tu, Dr. Amanda W. Dombrowski, Dr. Gashaw M. Goshu, Dr. Anil Vasudevan, Dr. Stevan W. Djuric, Dr. Ying Wang, *Angew. Chem. Int. Ed.* 2019, 7987.

### Dosing accuracy Pd-ChemBeads

The repeated dosing accuracy of the Chronect Quantos was tested with all 12 of the Palladium-ChemBeads required for a Suzuki screening plate (figure S8). The target dose for each palladium catalyst can be found in a later section detailing the procedure for kit preparation. Again, the dosing results are remarkably consistent, with only one vial requiring a top up to reach the minimum required amount for the reaction. Typically, we do not correct any doses which exceed the +10% deviation.

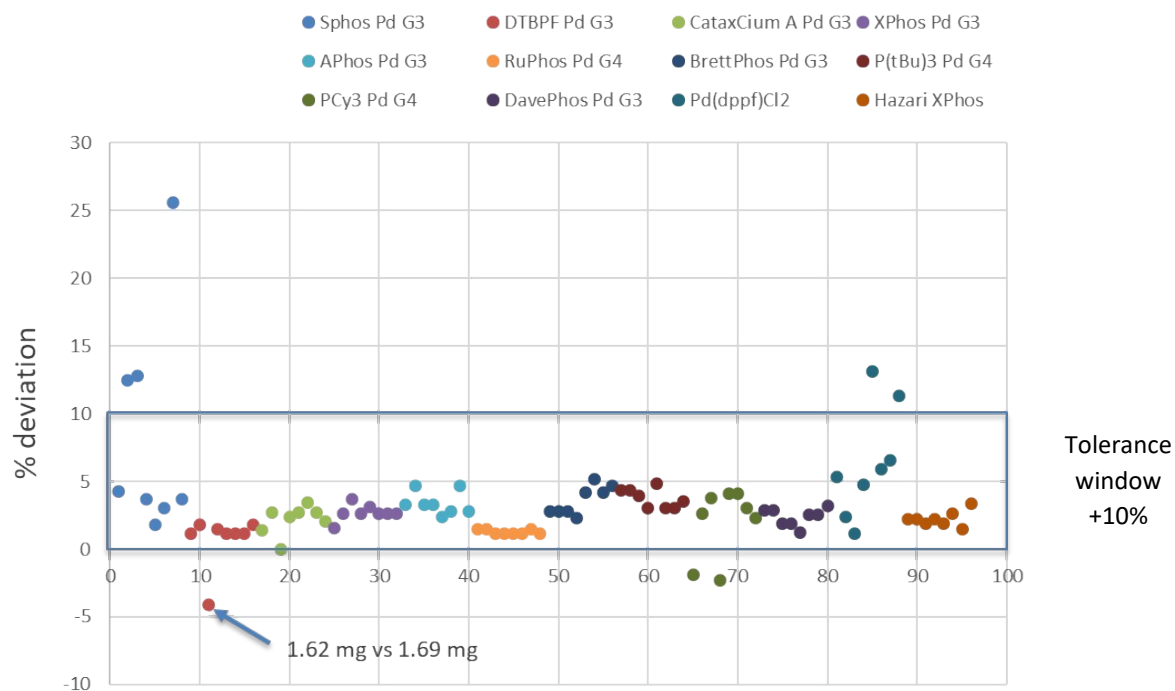

Figure S8: Assessing the dosing accuracy of Pd-ChemBeads with repeated dosing (x8) of 12 different Pd-ChemBeads. Even on a small scale, dosing is constant and largely within a window of +10% deviation. Only one dose failed to reach the minimum amount required [1.62 mg (actual) vs 1.69 mg (required)].

### Glass bead spacers

Ideally, we wanted to control when the palladium catalyst and base come into contact to prevent any risk of catalyst decomposition.  $\text{Cs}_2\text{CO}_3$  and  $\text{CuI}$  (5 wt%) ChemBeads were used to investigate the weight of glass beads required to keep the two components separate due to the clear colour change when they react. From our investigations it is clear  $\geq 50$  mg of glass beads is required to keep the two components separate (Figure S9).

$\text{Cs}_2\text{CO}_3$  then beads (150-200  $\mu\text{m}$ ) then  $\text{CuI}$  5% <100  $\mu\text{m}$

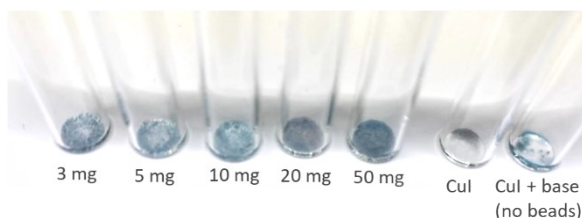

$\text{CuI}$  5% <100  $\mu\text{m}$ , beads (150-200  $\mu\text{m}$ ) then  $\text{Cs}_2\text{CO}_3$

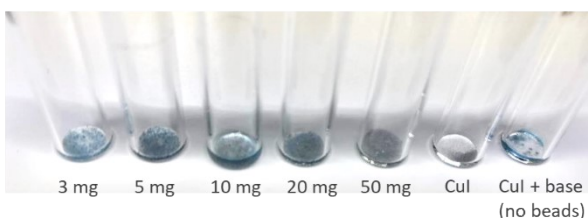

$\text{Cs}_2\text{CO}_3$  then beads (150-200  $\mu\text{m}$ ) then  $\text{CuI}$  5% <100  $\mu\text{m}$

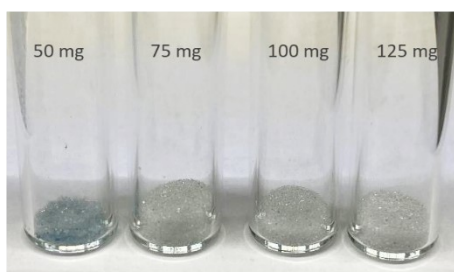

$\text{CuI}$  5% <100  $\mu\text{m}$ , beads (150-200  $\mu\text{m}$ ) then  $\text{Cs}_2\text{CO}_3$

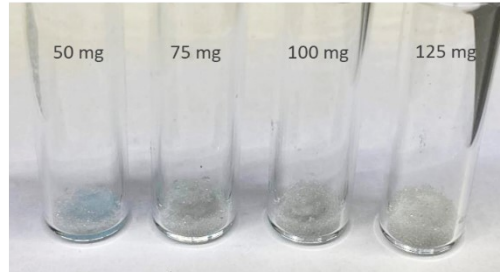

Figure S9: Investigation into the weight of glass beads to act as a spacer to keep  $\text{Cs}_2\text{CO}_3$  and  $\text{CuI}$  (5 wt%) ChemBeads apart. A clear colour change can be seen (colourless to blue) when they react.

### Reaction solvent evaporation

Despite sealing according to the manufacturer's instructions, solvent evaporation still occurs within the plate. Two representative examples of solvent loss are shown below. Despite being heated *c.a.* 20 °C below the boiling point of these solvents, evaporation of a number of wells occurs. This is typically less than 10% of reaction vials. In these wells the appropriate solvent (100 µL) is added then then the whole block is stirred again for 5 min to ensure all samples are in solution for the creation of the analytical plates.

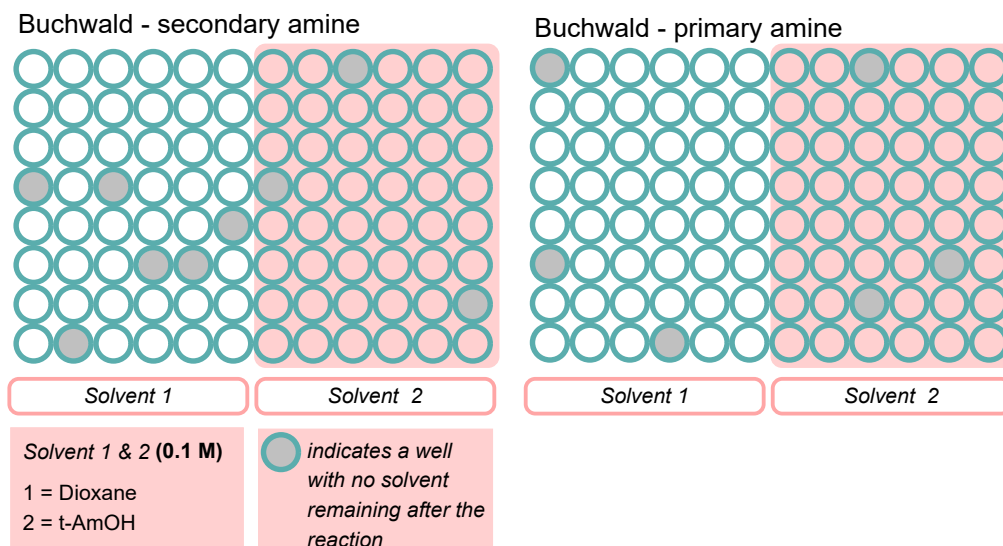

Figure S10: Schematic detailing the solvent evaporation observed from two screening kits. Less than 10% of the wells had no solvent left in them.

### Comparing Pd-ChemBeads to pure Pd-catalysts

Before their use in a screening kit, we wanted to ensure the Pd-ChemBeads were comparable to commercially available, powdered catalyst. The Pd(dppf)Cl<sub>2</sub> ChemBeads (two bed sizes) and powdered catalyst were compared heat-to-head in two test reactions and can be seen below (figure S11). In each case the Chembeads and powdered catalysts proved equivalent, with the same conversion achieved in each test reaction.

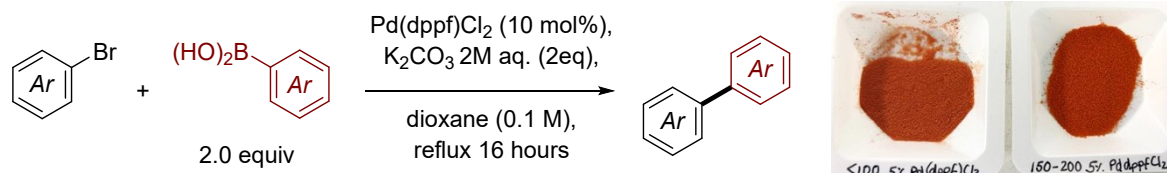

|   |                                              |                                             |             |
|---|----------------------------------------------|---------------------------------------------|-------------|
|   | Entry                                        | Catalyst                                    | Conversion* |
|   | 1                                            | Pd(dppf)Cl <sub>2</sub> (powdered catalyst) | >95%        |
|   | 2                                            | Pd(dppf)Cl <sub>2</sub> (5 w/w%, <100 μM)   | >95%        |
| 3 | Pd(dppf)Cl <sub>2</sub> (5 w/w%, 150-200 μM) | >95%                                        |             |
|   | Entry                                        | Catalyst                                    | Conversion* |
|   | 4                                            | Pd(dppf)Cl <sub>2</sub> (powdered catalyst) | >90%        |
|   | 5                                            | Pd(dppf)Cl <sub>2</sub> (5 w/w%, <100 μM)   | >90%        |
| 6 | Pd(dppf)Cl <sub>2</sub> (5 w/w%, 150-200 μM) | >90%                                        |             |

\*Based on LCAP

Reactions 5 and 6 were repeated again in quadruplicate (8 reactions in total) and >95% conversion was observed by LCAP in each case.

Figure S11: Comparison between powdered catalyst and the manufactured ChemBeads (two bead sizes). In all cases the ChemBeads and powdered catalysts performed equally.

## Astex preferred reaction conditions from electronic lab notebook (ELN)

The most common experimental conditions (catalyst, base, and solvent) have been extracted from Astex's electronic lab notebook for the cross-coupling reactions investigated by the screening plates.

### Suzuki-Miyaura cross-coupling

The ELN data was extracted in Feb 2021 with only successful reactions were included in this analysis. 888 entries were found for catalysts for the Suzuki-Miyaura reaction, 963 entries relating to bases and 942 entries relating to solvent systems. From the extracted ELN data the most commonly used catalyst, base and solvent system is as follows; Pd(PPh<sub>3</sub>)<sub>4</sub>, K<sub>2</sub>CO<sub>3</sub> and dioxane–water.

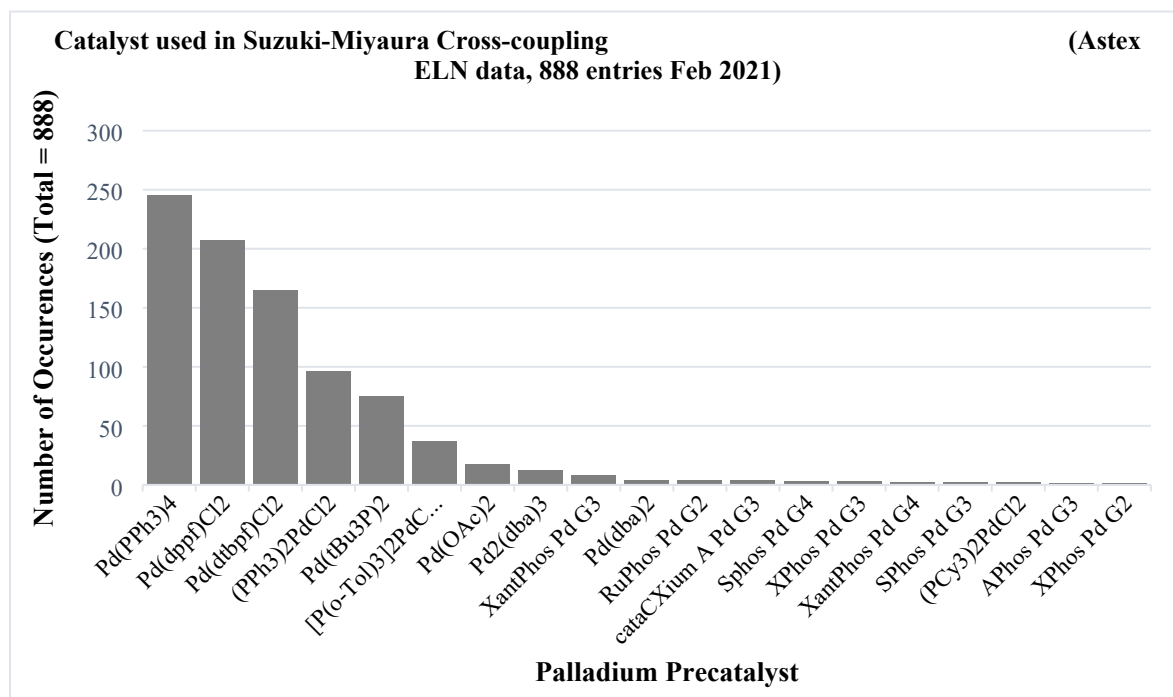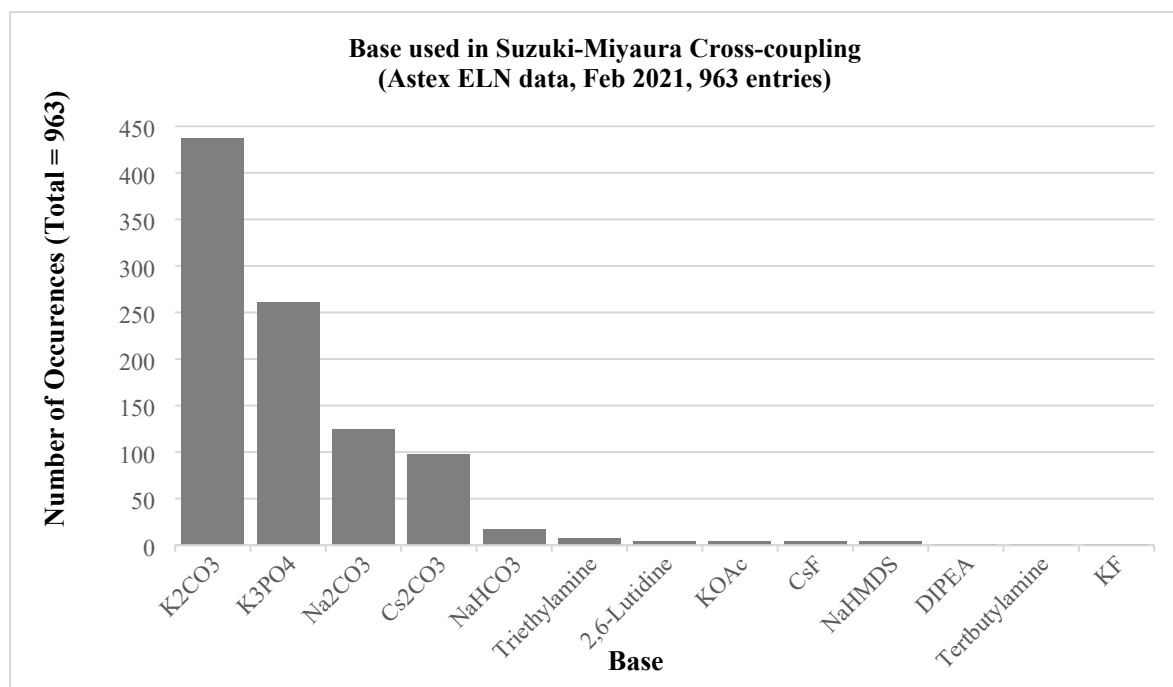

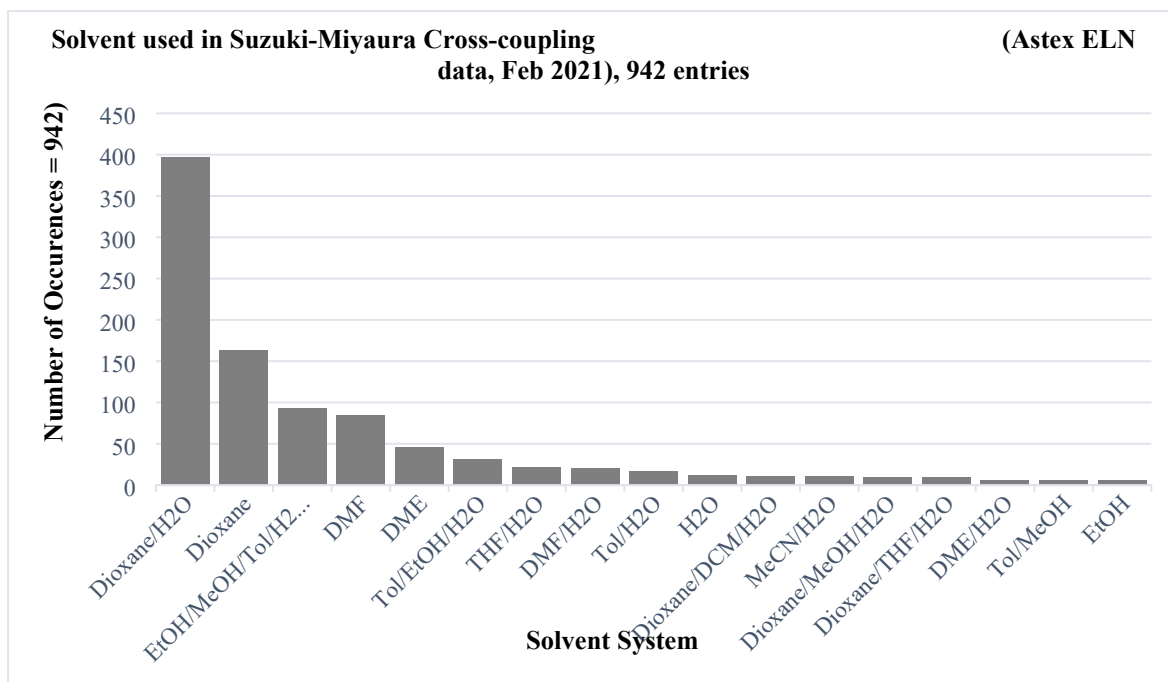

Figure S12: The most commonly used experimental conditions within the ELN for the Suzuki-Miyaura cross coupling reaction. A - the most commonly used catalyst, B - the most commonly used bases and C - the most commonly used solvent systems.

### Buchwald-Hartwig Amination

The ELN data was extracted in Oct 2021 with only successful reactions were included in this analysis. 655 entries were found for catalysts for the Suzuki-Miyaura reaction, 641 entries relating to bases and 764 entries relating to solvent systems. From the extracted ELN data the most commonly used catalyst, base and solvent system is as follows; *t*BuXPhos, *t*-BuONa and dioxane.

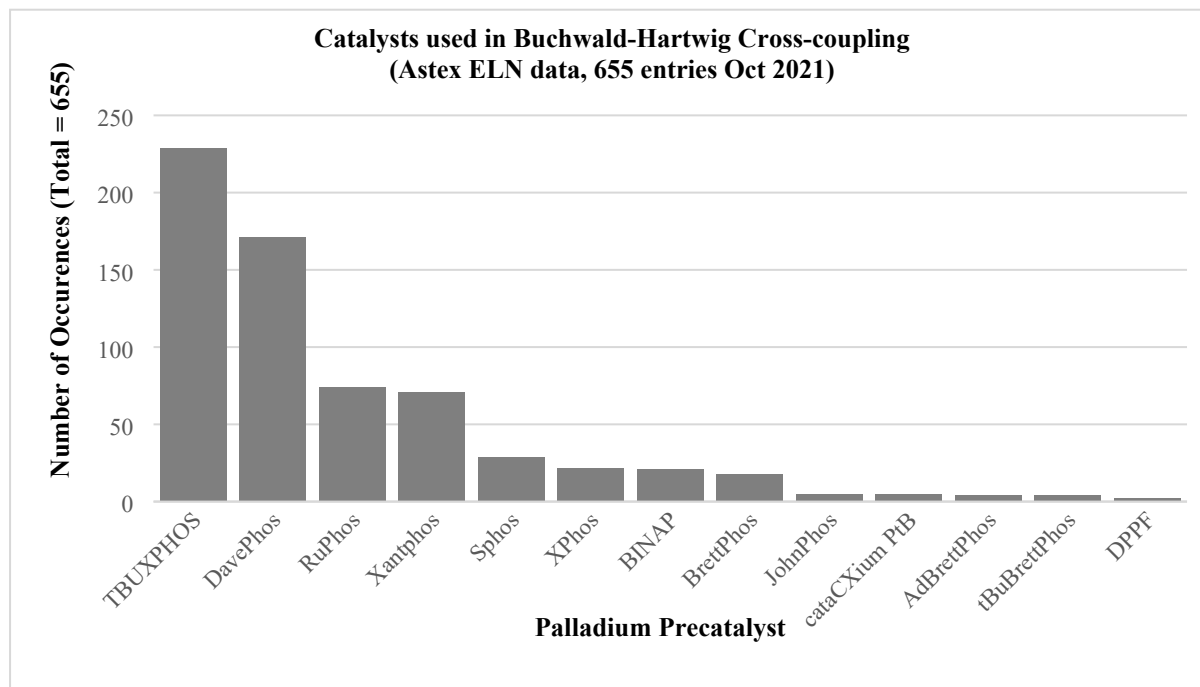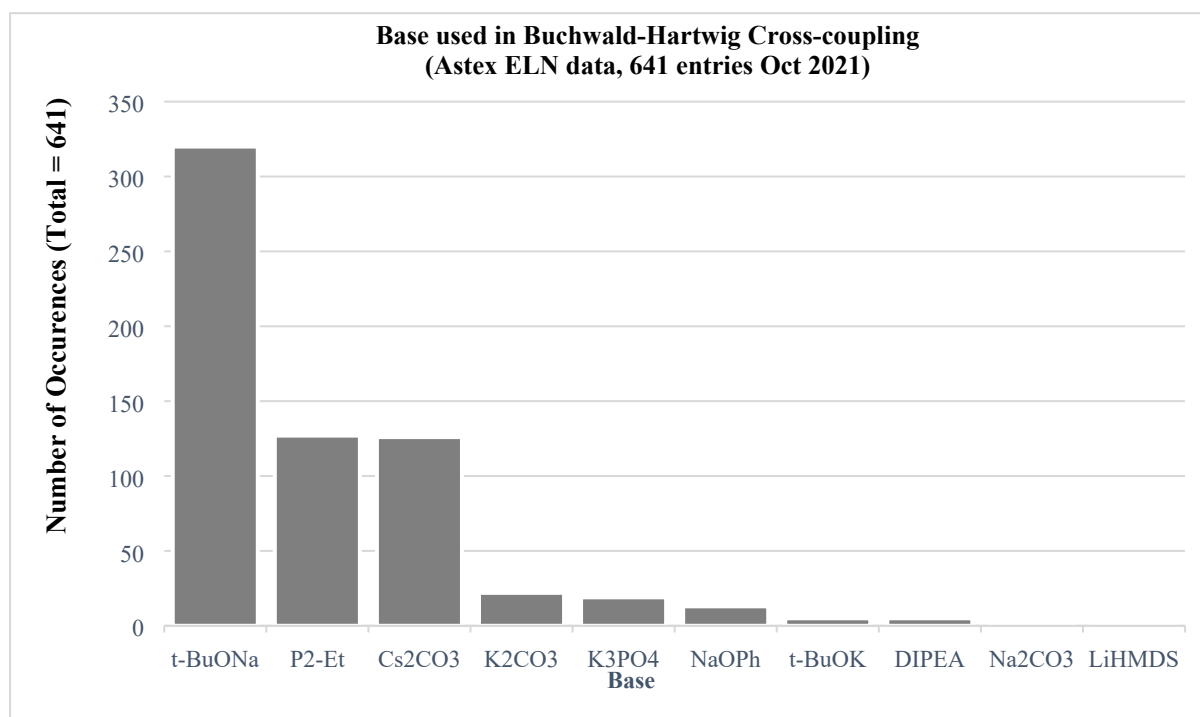



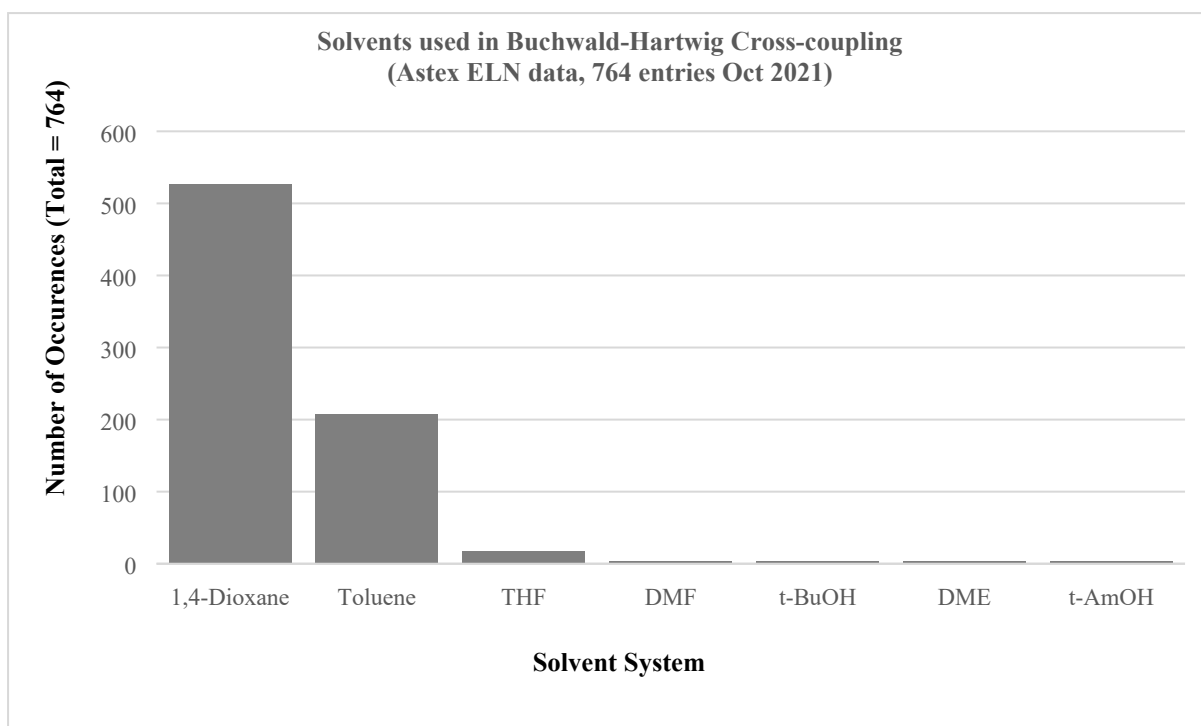

Figure S13: The most commonly used experimental conditions within the ELN for the Buchwald-Hartwig cross coupling reaction. A - the most commonly used catalyst, B - the most commonly used bases and C - the most commonly used solvent systems.

## SNAr

The ELN data was extracted in Oct 2022, with only successful reactions were included in this analysis. 1092 entries were found for additives for successful nucleophilic aromatic substitution reactions, 1092 entries relating to bases and additives, and 816 entries relating to solvent systems. From the extracted ELN data the most commonly used additive and solvent system is as follows; DIPEA and DMSO.

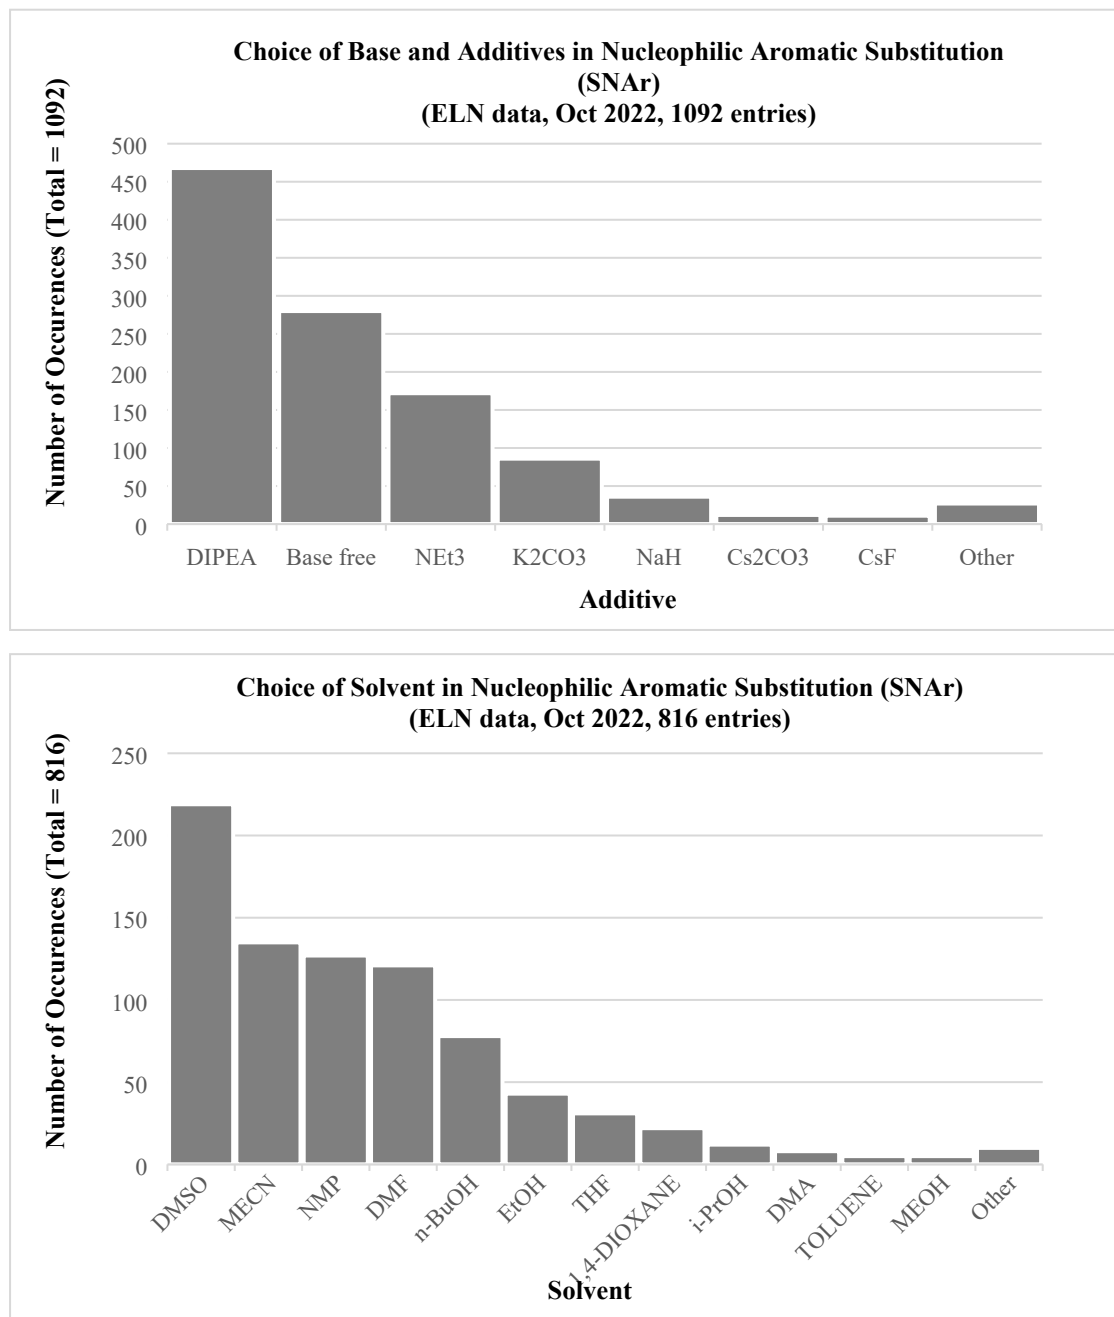

Figure S14: The most commonly used experimental conditions within the ELN for the Nucleophilic Aromatic Substitution ( $S_NAr$ ) reaction. A - the most commonly used base/additive, B - the most commonly used solvent systems.

## Screening plate information

### Kit prep

The consumable components for the screening kits are assembled before they are placed on the Chronect Quantos platform for dosing. The analytical sales Para-dox blocks are loaded with 1 mL glass vials (884001). Quick loading of the vials is achieved by inverting the vials into an empty stackable tray (vials are now up-side down and this is repeated into the Para-dox block. Stirrer bars (13258) are loaded into every vial using a Drop Dispenser (VPS-VP711A-96-AS-1). Finally, two rubber mats and a new PFA film are added to the lid.

On completion of the solid dosing, the vials contain a stir bar, base, glass bead spacer and Pd-catalyst with the order depicted below (with the exception of the  $S_NAr$  plate). The plates are sealed as per the manufacturer's instructions, then stored in Mylar bags (34 cm × 24 cm) with a 300cc oxygen absorber (both purchased from mylarbags.com). They can then be stored in the freezer until required.

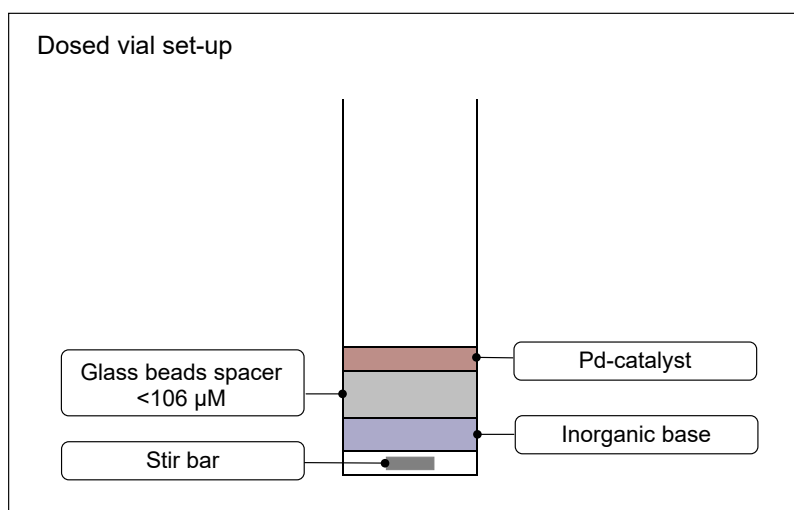

Figure S15: A schematic showing the components in the vials upon completion of solid dosing.

When the kit is required, it can be removed from the freezer and allowed to warm up to room temperature before the mylar bag is opened. Liquid reagents and starting material stock solutions can then be added to the plate using the procedure detailed below.

### Suzuki-Miyaura screening kit

The plate design for the Suzuki-Miyaura screening plate can be seen below. An Analytical Sales 96 well Para-dox® Aluminium Reaction Block was dosed with all solid reagents using the Chronect Quantos (Axel Semrau, Germany). The order of addition was as follows; solid base, glass bead spacer and ChemBeads (glass beads coated in palladium pre-catalyst, 10 wt% unless otherwise stated). The addition of the coupling partners follows the procedure listed below.

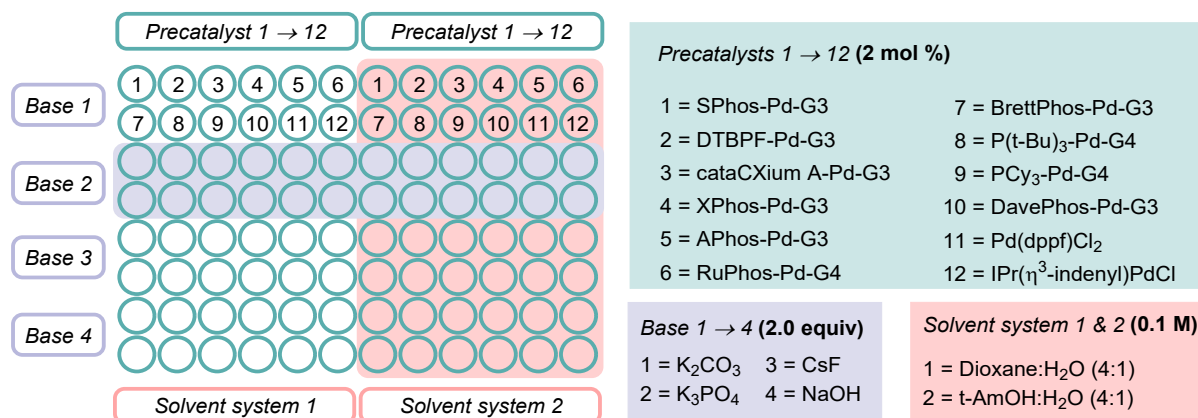

| Reagent                          | FW (gmol <sup>-1</sup> ) | Loading (equiv) | Mass (mg) | ChemBead loading | Mass (mg) |
|----------------------------------|--------------------------|-----------------|-----------|------------------|-----------|
| SPhos-Pd-G3                      | 780.33                   | 0.02            | 0.156     | 10.0%            | 1.56      |
| DTBPF-Pd-G3                      | 844.24                   | 0.02            | 0.169     | 10.0%            | 1.69      |
| cataCXium A-Pd-G3                | 728.35                   | 0.02            | 0.146     | 10.0%            | 1.46      |
| XPhos-Pd-G3                      | 846.54                   | 0.02            | 0.169     | 10.0%            | 1.69      |
| APhos-Pd-G3                      | 635.17                   | 0.02            | 0.127     | 5.0%             | 2.54      |
| RuPhos-Pd-G4                     | 850.4                    | 0.02            | 0.170     | 10.0%            | 1.70      |
| BrettPhos-Pd-G3                  | 906.6                    | 0.02            | 0.181     | 10.0%            | 1.81      |
| P(t-Bu) <sub>3</sub> -Pd-G4      | 568.08                   | 0.02            | 0.114     | 10.0%            | 1.14      |
| PCy <sub>3</sub> -Pd-G4          | 664.26                   | 0.02            | 0.133     | 10.0%            | 1.33      |
| DavePhos-Pd-G3                   | 763.35                   | 0.02            | 0.153     | 5.0%             | 3.05      |
| Pd(dppf)Cl <sub>2</sub>          | 731.73                   | 0.02            | 0.146     | 5.0%             | 2.93      |
| IPr(η <sup>3</sup> -indenyl)PdCl | 702.81                   | 0.02            | 0.141     | 10.0%            | 1.34      |
| K <sub>2</sub> CO <sub>3</sub>   | 138.21                   | 2.0             | 2.76      | n/a              | n/a       |
| K <sub>3</sub> PO <sub>4</sub>   | 212.27                   | 2.0             | 4.25      | n/a              | n/a       |
| CsF                              | 151.91                   | 2.0             | 3.04      | n/a              | n/a       |
| NaOH                             | 18.02                    | 2.0             | 0.80      | n/a              | n/a       |

Figure S16: The plate design and the target dose for each component for the Suzuki-Miyaura screening plate.

### Buchwald Primary amine screening kit

The plate design for the primary amine Buchwald screening plate can be seen below. An Analytical Sales 96 well Para-dox® Aluminium Reaction Block was dosed with all solid inorganic bases using the Chronect Quantos (Axel Semrau, Germany). The organic bases were added as neat solutions using the procedure listed below and the addition of the coupling partners follows the procedure listed below.

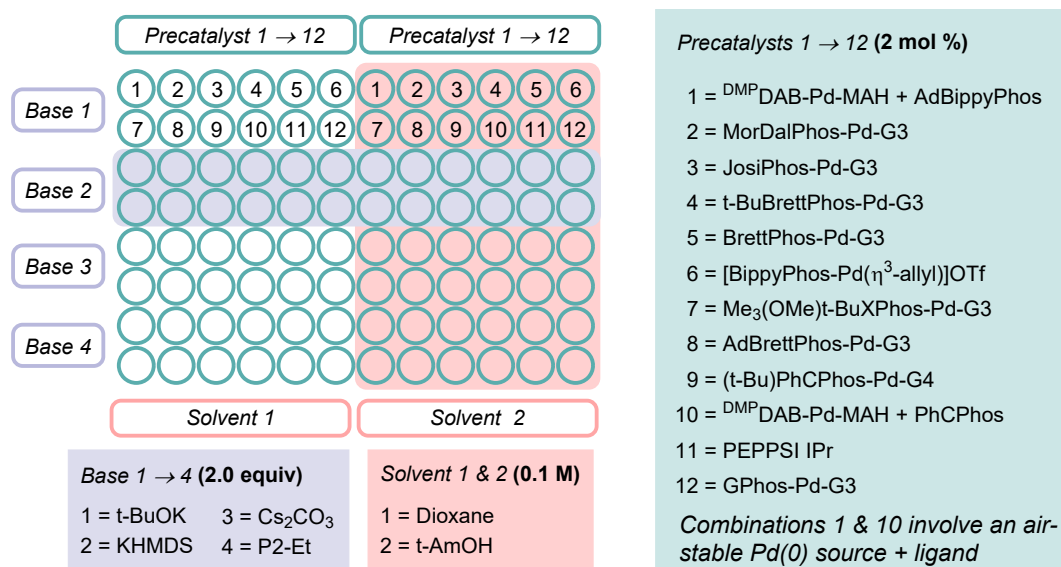

| Reagent                              | FW (gmol <sup>-1</sup> ) | Loading (equiv) | Mass (mg) | ChemBead loading | Mass (mg) |
|--------------------------------------|--------------------------|-----------------|-----------|------------------|-----------|
| <sup>DMP</sup> DAB Pd-MAH            | 468.84                   | 0.02            | 0.094     | 10.0%            | 0.94      |
| Ad-BippyPhos                         | 662.84                   | 0.02            | 0.133     | 10.0%            | 1.33      |
| MorDal-Phos-Pd-G4                    | 847.48                   | 0.02            | 0.169     | 10.0%            | 1.69      |
| JosiPhos-Pd-G3                       | 926.40                   | 0.02            | 0.185     | 10.0%            | 1.85      |
| t-BuBrettPhos-Pd-G3                  | 856.54                   | 0.02            | 0.171     | 10.0%            | 1.71      |
| BrettPhos-Pd-G4                      | 906.60                   | 0.02            | 0.181     | 10.0%            | 1.81      |
| [BippyPhos-Pd( $\eta^3$ -allyl)]OTf  | 803.19                   | 0.02            | 0.161     | 10.0%            | 1.61      |
| Me <sub>3</sub> (OMe)t-BuXPhos-Pd-G3 | 822.52                   | 0.02            | 0.165     | 10.0%            | 1.65      |
| AdBrettPhos-Pd-G3                    | 1010.76                  | 0.02            | 0.202     | 10.0%            | 2.02      |
| (t-Bu)PhCPhos-Pd-G4                  | 788.36                   | 0.02            | 0.158     | 10.0%            | 1.58      |
| PhCPhos                              | 424.56                   | 0.02            | 0.085     | 5.0%             | 1.70      |
| PEPPSI IPr                           | 681.54                   | 0.02            | 0.136     | 10.0%            | 1.36      |
| GPhos-Pd-G3                          | 906.50                   | 0.02            | 0.181     | 10.0%            | 1.81      |
| t-BuOK                               | 112.23                   | 2.0             | 2.24      | n/a              | n/a       |
| KHMDS                                | 199.53                   | 2.0             | 3.99      | n/a              | n/a       |
| Cs <sub>2</sub> CO <sub>3</sub>      | 325.83                   | 2.0             | 6.52      | n/a              | n/a       |
| P2-Et                                | 339.48                   | 2.0             | 6.79      | n/a              | n/a       |

Figure S17: The plate design and the target dose for each component for the Buchwald-Hartwig primary amine screening plate.

### Buchwald Secondary amine and aniline screening kit

The plate design for the secondary amine Buchwald screening plate can be seen below. An Analytical Sales 96 well Para-dox® Aluminium Reaction Block was dosed with all solid inorganic bases using the Chronect Quantos (Axel Semrau, Germany). The organic bases were added as neat solutions using the procedure listed below and the addition of the coupling partners follows the procedure listed below.

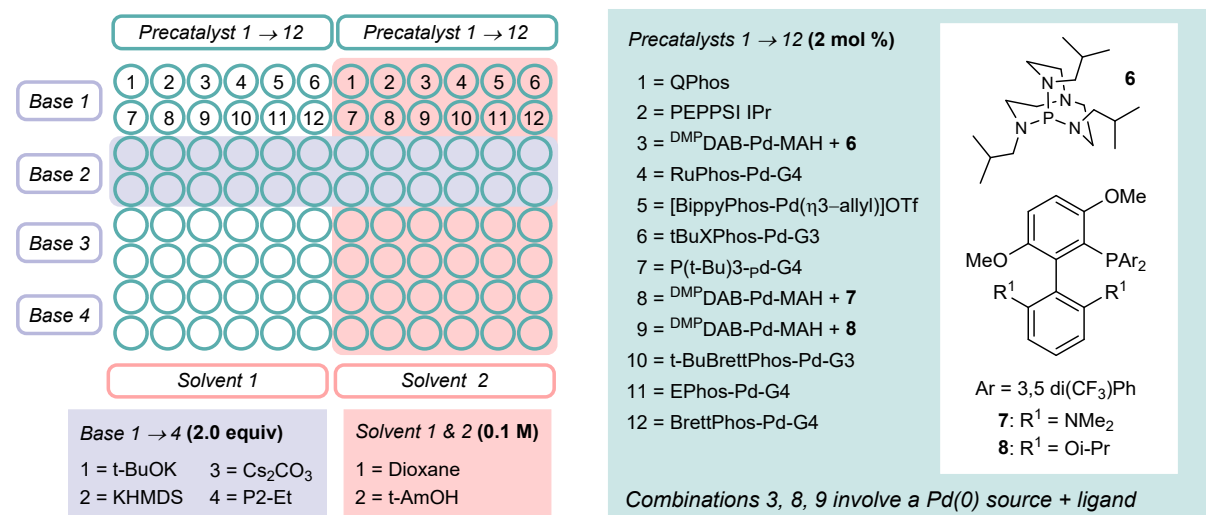

| Reagent                                | FW (gmol <sup>-1</sup> ) | Loading (equiv) | Mass (mg)          | ChemBead loading | Mass (mg) |
|----------------------------------------|--------------------------|-----------------|--------------------|------------------|-----------|
| <sup>DMP</sup> DAB-Pd-MAH              | 468.84                   | 0.02            | 0.094              | 10.0%            | 0.94      |
| QPhos-Pd-G3                            | 1080.44                  | 0.02            | 0.216              | 10.0%            | 2.16      |
| PEPPSI IPr                             | 681.54                   | 0.02            | 0.136              | 10.0%            | 1.36      |
| Triisobutylphosphatranene ( <b>6</b> ) | 342.58                   | 0.02            | 0.137 <sup>‡</sup> |                  |           |
| RuPhos-Pd-G4                           | 850.40                   | 0.02            | 0.170              | 10.0%            | 1.70      |
| [BippyPhos-Pd( $\eta^3$ -allyl)]OTf    | 803.19                   | 0.02            | 0.161              | 10.0%            | 1.61      |
| t-BuXPhos-Pd-G3                        | 794.46                   | 0.02            | 0.159              | 10.0%            | 1.59      |
| P(t-Bu) <sub>3</sub> -Pd-G4            | 568.08                   | 0.02            | 0.114              | 10.0%            | 1.14      |
| JackieiPhos/CPhos hybrid ( <b>7</b> )  | 786.64                   | 0.02            | 0.157              | 10.0%            | 1.57      |
| JackieiPhos/RuPhos hybrid ( <b>8</b> ) | 756.62                   | 0.02            | 0.151              | 10.0%            | 1.51      |
| t-BuBrettPhos-Pd-G3                    | 856.54                   | 0.02            | 0.171              | 10.0%            | 1.71      |
| EPhos-Pd-G4                            | 919.67                   | 0.02            | 0.184              | 10.0%            | 1.84      |
| BrettPhos-Pd-G4                        | 906.60                   | 0.02            | 0.181              | 10.0%            | 1.81      |
| t-BuOK                                 | 112.23                   | 2.0             | 2.24               | n/a              | n/a       |
| KHMDS                                  | 199.53                   | 2.0             | 3.99               | n/a              | n/a       |
| Cs <sub>2</sub> CO <sub>3</sub>        | 325.83                   | 2.0             | 6.52               | n/a              | n/a       |
| P2-Et                                  | 339.48                   | 2.0             | 6.79               | n/a              | n/a       |

Figure S18: The plate design and the target dose for each component for the Buchwald-Hartwig secondary amine and aniline screening plate. <sup>‡</sup>Dosed as stock solution in THF.

## Buchwald amide and oxygen screening kit

The plate design for the amide, oxygen and CN Buchwald screening plate can be seen below. An Analytical Sales 96 well Para-dox® Aluminium Reaction Block was dosed with all solid inorganic bases using the Chronect Quantos (Axel Semrau, Germany). The addition of the coupling partners follows the procedure listed below.

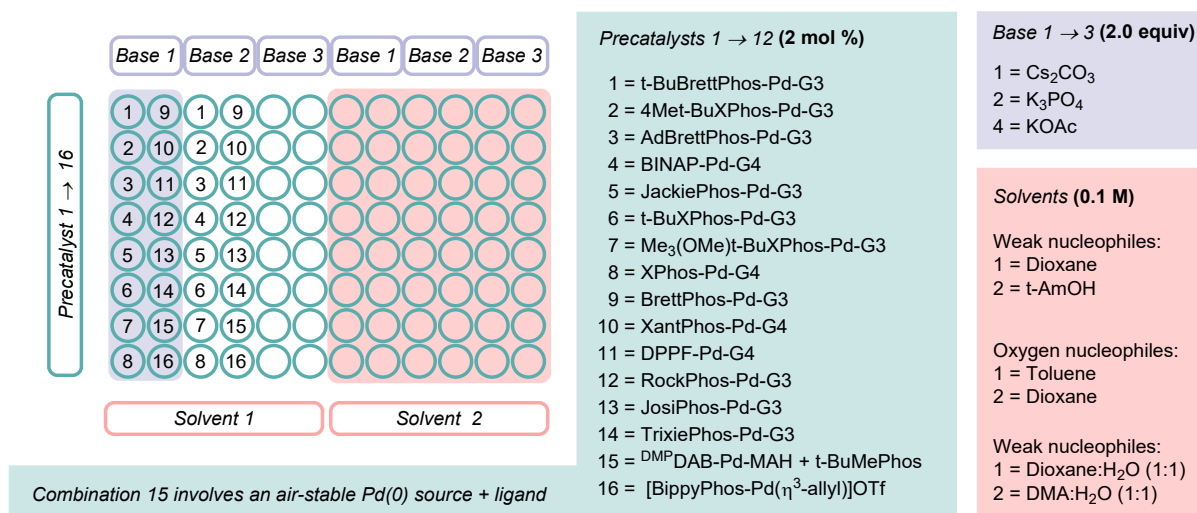

| Reagent                                  | FW (gmol <sup>-1</sup> ) | Loading (equiv) | Mass (mg) | ChemBead loading | Mass (mg) |
|------------------------------------------|--------------------------|-----------------|-----------|------------------|-----------|
| <sup>DMP</sup> DAB-Pd-MAH                | 468.84                   | 0.02            | 0.094     | 10.0%            | 0.94      |
| t-BuBrettPhos-Pd-G3                      | 856.54                   | 0.02            | 0.171     | 10.0%            | 1.71      |
| 4Met-BuXPhos-Pd-G3                       | 850.58                   | 0.02            | 0.170     | 10.0%            | 1.70      |
| AdBrettPhos-Pd-G3                        | 1010.76                  | 0.02            | 0.202     | 10.0%            | 2.02      |
| BINAP-Pd-G4                              | 1006.43                  | 0.02            | 0.201     | 10.0%            | 2.01      |
| JackiePhos-Pd-G3                         | 1166.48                  | 0.02            | 0.233     | 10.0%            | 2.33      |
| t-BuXPhos-Pd-G3                          | 794.46                   | 0.02            | 0.159     | 10.0%            | 1.59      |
| Me <sub>3</sub> (OMe)t-BuXPhos-Pd-G3     | 822.52                   | 0.02            | 0.165     | 10.0%            | 1.65      |
| XPhos-Pd-G4                              | 859.56                   | 0.02            | 0.172     | 10.0%            | 1.72      |
| BrettPhos-Pd-G3                          | 920.63                   | 0.02            | 0.184     | 10.0%            | 1.84      |
| XantPhos-Pd-G4                           | 962.43                   | 0.02            | 0.192     | 10.0%            | 1.92      |
| DPPF-Pd-G4                               | 925.17                   | 0.02            | 0.185     | 7.5%             | 2.47      |
| RockPhos-Pd-G3                           | 838.52                   | 0.02            | 0.168     | 10.0%            | 1.68      |
| JosiPhos-Pd-G3                           | 926.4                    | 0.02            | 0.185     | 10.0%            | 1.85      |
| TrixiePhos-Pd-G3                         | 768.31                   | 0.02            | 0.154     | 10.0%            | 1.54      |
| t-BuMePhos                               | 312.47                   | 0.02            | 0.062     | 5.0%             | 1.25      |
| [BippyPhos-Pd(η <sup>3</sup> -allyl)]OTf | 803.19                   | 0.02            | 0.161     | 10.0%            | 1.61      |
| Cs <sub>2</sub> CO <sub>3</sub>          | 325.83                   | 2.0             | 6.52      | n/a              | n/a       |
| K <sub>3</sub> PO <sub>4</sub>           | 212.27                   | 2.0             | 4.25      | n/a              | n/a       |
| KOAc                                     | 98.15                    | 2.0             | 1.96      | n/a              | n/a       |

Figure S19: The plate design and the target dose for each component for the Buchwald-Hartwig amide and oxygen screening plate.

### S<sub>N</sub>Ar screening kit

The plate design for the S<sub>N</sub>Ar screening plate can be seen below. An Analytical Sales 96 well Para-dox<sup>®</sup> Aluminium Reaction Block was dosed with all solid inorganic bases using the Chronect Quantos (Axel Semrau, Germany). The organic bases were added as neat solutions using the procedure listed below and the addition of the coupling partners follows the procedure listed below.

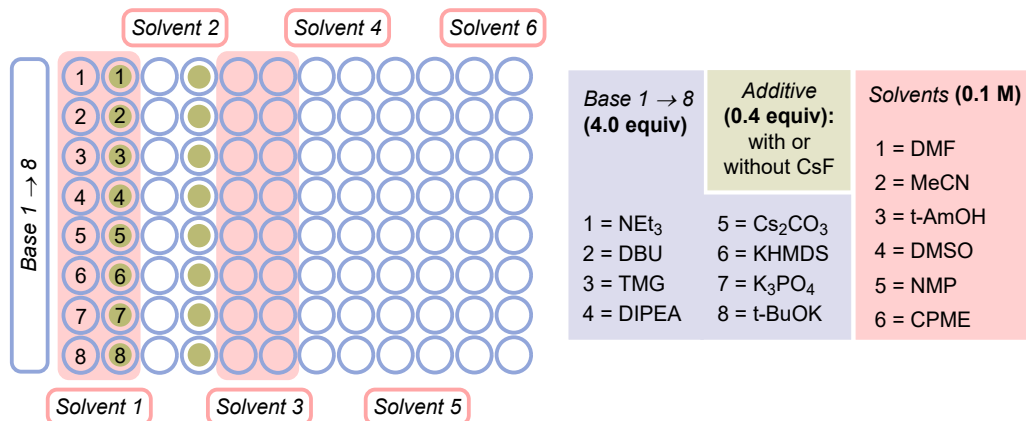

| Reagent                         | FW<br>(gmol <sup>-1</sup> ) | Loading<br>(equiv) | Mass<br>(mg) |
|---------------------------------|-----------------------------|--------------------|--------------|
| NEt <sub>3</sub>                | 101.22                      | 4                  | 4.05         |
| DBU                             | 152.27                      | 4                  | 6.09         |
| TMG                             | 115.21                      | 4                  | 4.61         |
| DIPEA                           | 129.28                      | 4                  | 5.17         |
| Cs <sub>2</sub> CO <sub>3</sub> | 325.83                      | 4                  | 13.03        |
| KHMDS                           | 199.53                      | 4                  | 7.98         |
| K <sub>3</sub> PO <sub>4</sub>  | 212.27                      | 4                  | 8.49         |
| t-BuOK                          | 112.23                      | 4                  | 4.49         |
| CsF                             | 151.91                      | 0.4                | 0.61         |

Figure S20: The plate design and the target dose for each component for the S<sub>N</sub>Ar screening plate.



### Setting up the screening kits

The total amount of solid reagent was aliquoted into the number of solvents required for the screening plate and weighed into an appropriate vial (7 mL screw cap for Suzuki and  $S_NAr$  and 10-20 mL vial Biotage, 354833 for Buchwald-Hartwig), both coupling partners were added to the same vial and the vial was degassed if necessary. The appropriate solvent was then added, and the mixture was sonicated until all solid had dissolved. Liquid handling of reagents and stock solutions was performed by Andrew+ liquid handler Andrew Alliance, Switzerland) equipped with Sartorius Picus® electronic pipettes or by hand using Sartorius Picus® electronic pipettes. If liquid reagents are required then these were added first, followed by the addition of the stock solutions. The plate was then sealed according to the manufacturers sealing guide and heated to an appropriate temperature overnight.

### Creation of the analytical plates for MISER

Analytical plates with a 1-400-fold dilution were created using the Integra Mini 96 and the Viaflo 96 / 384. *t*-AmOH (95  $\mu$ L) was added into all the coloured wells (figure S18) using the Integra Mini 96. Crude reaction mixture (5  $\mu$ L) was added into wells coloured in light blue (figure S18), mixed five times, then an aliquot (5  $\mu$ L) of the light blue well was transferred into the dark blue wells and mixed five times. The plate was sealed with a Thermo Scientific™ Easy Pierce Heat Sealing Foil (AB-1720).

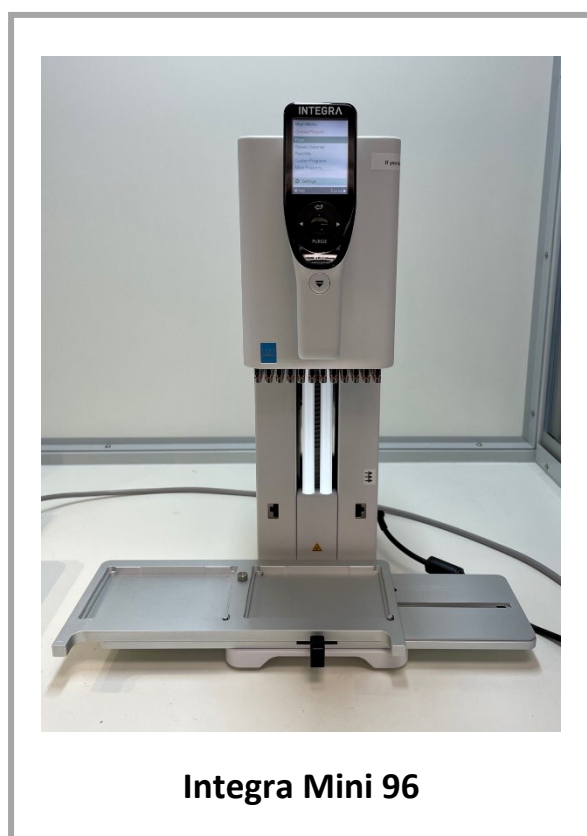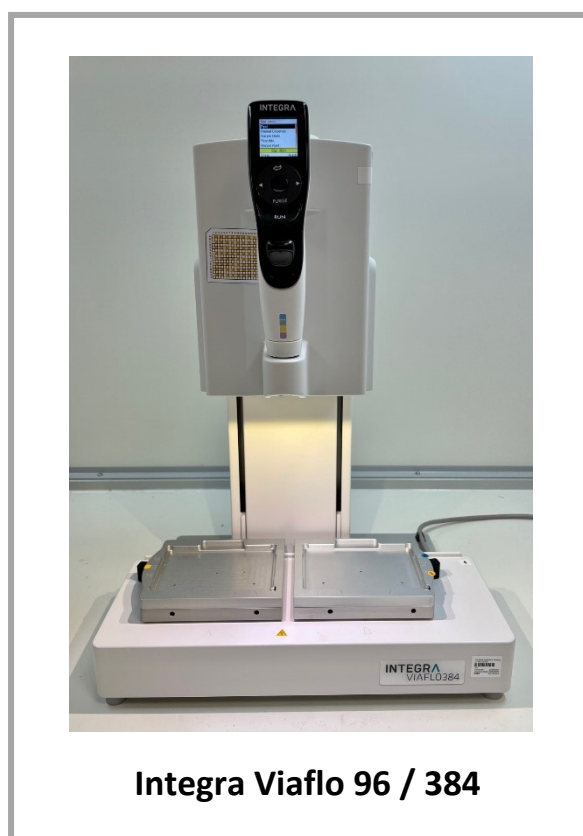

Figure S21: The Integra liquid handlers (Mini 96 and Viaflo 96 / 384) utilised in the production of the analytical plates.

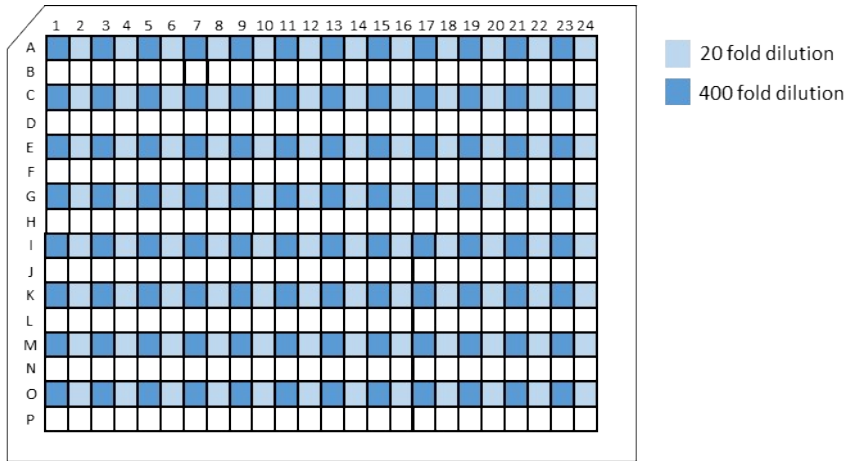

Figure S22: The plate layout for the 1-400-fold dilution required in the preparation of the screening plate.

## Screening kit analysis – MISER analysis

Suzuki-Miyaura Cross-coupling screening plate; 5-bromo-1H-pyrrolo[2,3-b]pyridine and (2-fluorophenyl)boronic acid

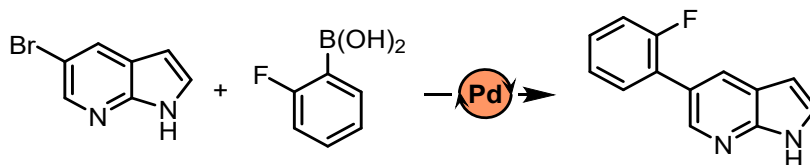

### MISER Analysis: 5-(2-fluorophenyl)-1H-pyrrolo[2,3-b]pyridine (Desired Product)

Max response: 464370.25

m/z: 213

|   | 1     | 2     | 3     | 4    | 5     | 6     | 7     | 8     | 9     | 10    | 11     | 12    |
|---|-------|-------|-------|------|-------|-------|-------|-------|-------|-------|--------|-------|
| A | 1.81  | 39.06 | 54.70 | 6.32 | 44.10 | 10.05 | 5.98  | 91.10 | 44.49 | 5.51  | 76.17  | 17.29 |
| B | 6.56  | 16.40 | 25.86 | 1.76 | 5.59  | 13.91 | 19.20 | 8.84  | 68.14 | 15.26 | 19.90  | 1.60  |
| C | 4.69  | 24.15 | 27.73 | 0.77 | 24.56 | 10.52 | 2.89  | 10.74 | 48.30 | 58.30 | 67.42  | 9.04  |
| D | 8.09  | 7.72  | 50.41 | 7.94 | 8.02  | 26.70 | 3.40  | 15.37 | 66.73 | 6.03  | 15.83  | 45.28 |
| E | 2.67  | 22.47 | 48.89 | 7.64 | 78.95 | 9.13  | 13.12 | 16.97 | 22.44 | 26.57 | 100.00 | 40.04 |
| F | 15.70 | 7.80  | 47.67 | 5.21 | 11.37 | 24.74 | 26.35 | 9.13  | 62.82 | 36.25 | 44.81  | 39.78 |
| G | 2.86  | 13.13 | 6.91  | 1.34 | 11.32 | 5.14  | 3.17  | 29.69 | 5.69  | 5.54  | 40.67  | 8.47  |
| H | 21.08 | 12.99 | 5.85  | 1.56 | 7.08  | 30.28 | 7.74  | 30.93 | 2.48  | 3.88  | 22.58  | 19.10 |

**Legend**

- 66.7% ≤ val < 100.0%
- 33.3% ≤ val < 66.7%
- 0.0% ≤ val < 33.3%

| Well | MISER result (%) | LCAP (%) | LCMS spectra |
|------|------------------|----------|--------------|
| E11  | 100.00           | 80.0     |              |
| A8   | 91.10            | 70.0     |              |
| E5   | 78.95            | 76.0     |              |

Buchwald primary amine screening plate (unhindered primary amine); 5-bromo-1H-pyrrolo[2,3-b]pyridine and 1-(pyridin-4-yl)methanamine

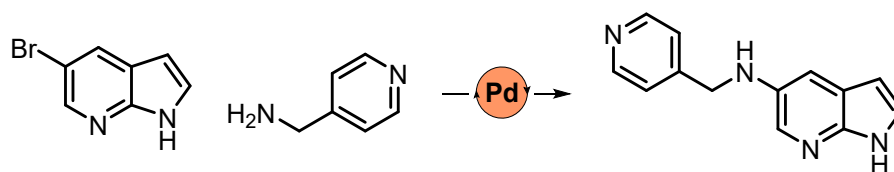

MISER Analysis: N-[(pyridin-4-yl)methyl]-1H-pyrrolo[2,3-b]pyridin-5-amine (Desired Product)

Max response: 393248.44

m/z: 225

|   | 1     | 2      | 3    | 4     | 5    | 6     | 7     | 8     | 9    | 10    | 11   | 12    |
|---|-------|--------|------|-------|------|-------|-------|-------|------|-------|------|-------|
| A | 0.00  | 0.00   | 0.50 | 3.63  | 0.57 | 10.53 | 5.35  | 0.00  | 0.00 | 68.87 | 2.54 | 14.94 |
| B | 47.00 | 100.00 | 0.00 | 2.40  | 0.59 | 56.23 | 42.03 | 22.66 | 6.38 | 0.37  | 0.00 | 16.56 |
| C | 8.69  | 1.30   | 0.36 | 58.03 | 0.46 | 1.04  | 77.94 | 0.00  | 0.00 | 63.90 | 2.51 | 34.14 |
| D | 0.48  | 64.31  | 0.47 | 0.37  | 0.00 | 1.04  | 0.00  | 0.42  | 1.02 | 0.00  | 0.00 | 22.40 |
| E | 0.00  | 0.00   | 0.00 | 0.29  | 0.00 | 0.00  | 9.26  | 0.00  | 0.00 | 6.89  | 0.00 | 0.55  |
| F | 1.58  | 10.08  | 0.00 | 0.00  | 0.00 | 0.56  | 5.13  | 1.42  | 0.00 | 0.00  | 0.00 | 0.00  |
| G | 2.46  | 0.00   | 0.00 | 0.72  | 0.00 | 0.00  | 0.35  | 0.00  | 0.00 | 3.70  | 0.00 | 0.00  |
| H | 2.10  | 4.08   | 0.00 | 0.00  | 0.00 | 1.27  | 0.34  | 11.18 | 0.00 | 0.00  | 0.00 | 0.00  |

Legend  
 66.7% ≤ val < 100.0%  
 33.3% ≤ val < 66.7%  
 0.0% ≤ val < 33.3%

| Well | MISER result (%) | LCAP (%) | LCMS spectra |
|------|------------------|----------|--------------|
| B2   | 100.00           | 68.7     |              |
| C7   | 77.94            | 40.4     |              |
| A10  | 68.87            | 41.3     |              |

Buchwald primary amine screening plate (hindered primary amine); 5-bromoisoquinoline and 2-phenylpropan-2-amine

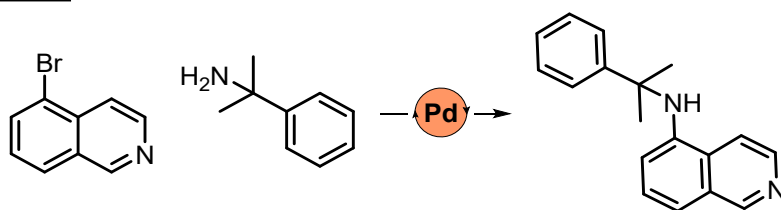

MISER Analysis: N-(2-phenylpropan-2-yl)quinolin-4-amine (Desired Product)

Max response: 988515.56

m/z: 263

|   | 1     | 2     | 3     | 4    | 5     | 6     | 7     | 8    | 9      | 10    | 11    | 12    |
|---|-------|-------|-------|------|-------|-------|-------|------|--------|-------|-------|-------|
| A | 2.80  | 2.13  | 0.00  | 0.00 | 0.00  | 0.00  | 0.00  | 0.00 | 2.58   | 0.00  | 0.00  | 7.38  |
| B | 1.27  | 0.00  | 14.54 | 2.16 | 2.27  | 3.59  | 0.00  | 0.00 | 100.00 | 51.09 | 0.00  | 2.56  |
| C | 0.00  | 0.00  | 2.93  | 0.00 | 4.29  | 43.62 | 0.00  | 0.00 | 0.00   | 0.00  | 0.00  | 9.07  |
| D | 45.35 | 31.57 | 0.00  | 0.00 | 38.58 | 41.40 | 0.00  | 0.00 | 8.40   | 0.00  | 13.59 | 0.00  |
| E | 3.69  | 1.22  | 0.00  | 0.00 | 0.00  | 6.42  | 13.36 | 0.00 | 3.07   | 0.00  | 0.00  | 21.42 |
| F | 0.00  | 0.00  | 0.00  | 0.00 | 0.00  | 0.00  | 0.00  | 0.00 | 14.12  | 3.30  | 0.00  | 1.47  |
| G | 1.12  | 0.00  | 0.00  | 0.00 | 0.00  | 0.00  | 1.47  | 0.00 | 0.00   | 0.00  | 0.00  | 1.79  |
| H | 0.00  | 0.00  | 1.62  | 0.00 | 0.00  | 0.00  | 0.00  | 0.00 | 1.36   | 0.00  | 0.00  | 3.66  |

**Legend**

66.7% ≤ val < 100.0%

33.3% ≤ val < 66.7%

0.0% ≤ val < 33.3%

| Well | MISER result desired product (%) | LCAP (%) | LCMS spectra |
|------|----------------------------------|----------|--------------|
| B9   | 100.00                           | 49.4     |              |
| B10  | 51.09                            | 34.6     |              |
| D1   | 45.35                            | 22.7     |              |

Buchwald secondary amine / aniline screening plate (secondary amine); 5-bromo-1H-pyrrolo[2,3-b]pyridine and tert-butyl piperazine-1-carboxylate

MISER Analysis: tert-butyl 4-{1H-pyrrolo[2,3-b]pyridin-5-yl}piperazine-1-carboxylate (Desired Product)

Max response: 375059.47

m/z: 303

|   | 1     | 2     | 3      | 4     | 5     | 6     | 7     | 8    | 9     | 10    | 11    | 12    |
|---|-------|-------|--------|-------|-------|-------|-------|------|-------|-------|-------|-------|
| A | 41.12 | 0.00  | 0.00   | 3.52  | 45.10 | 9.54  | 82.72 | 0.00 | 0.00  | 0.00  | 25.69 | 35.57 |
| B | 38.87 | 6.48  | 0.00   | 3.55  | 0.00  | 10.46 | 20.50 | 0.00 | 24.84 | 17.04 | 0.00  | 59.47 |
| C | 70.66 | 54.67 | 100.00 | 83.17 | 88.80 | 73.81 | 68.42 | 0.00 | 0.00  | 53.91 | 17.01 | 31.18 |
| D | 53.58 | 70.06 | 73.61  | 65.26 | 51.66 | 47.18 | 0.00  | 0.00 | 22.17 | 18.04 | 0.00  | 53.54 |
| E | 0.00  | 0.00  | 0.00   | 0.00  | 0.00  | 0.00  | 0.00  | 0.00 | 0.00  | 0.00  | 0.00  | 0.00  |
| F | 0.00  | 0.00  | 0.00   | 0.00  | 0.00  | 0.00  | 0.00  | 0.00 | 0.00  | 0.00  | 0.00  | 0.00  |
| G | 0.00  | 0.00  | 0.00   | 0.00  | 0.00  | 0.00  | 0.00  | 0.00 | 0.00  | 0.00  | 0.00  | 0.00  |
| H | 0.00  | 0.00  | 0.00   | 0.00  | 0.00  | 0.00  | 0.00  | 0.00 | 0.00  | 0.00  | 0.00  | 0.00  |

**Legend**  
 66.7% ≤ val <100.0%  
 33.3% ≤ val <66.7%  
 0.0% ≤ val <33.3%

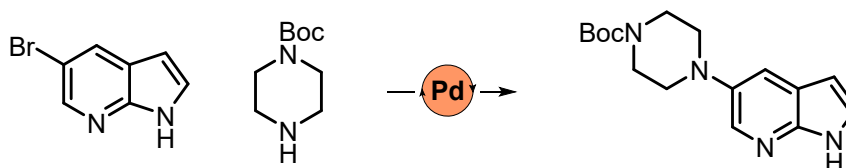

| Well | MISER result desired product (%) | LCAP (%) | LCMS spectra | 0.25 mmol scale up LCAP (%) |
|------|----------------------------------|----------|--------------|-----------------------------|
| C3   | 100.00                           | 24.0     |              | 26.0                        |
| C5   | 88.80                            | 28.0     |              | 60.0                        |

|    |       |      |  |      |
|----|-------|------|--|------|
| C4 | 83.17 | 28.0 |  | 33.0 |
|----|-------|------|--|------|

Buchwald secondary amine / aniline screening plate (aniline); 5-bromo-1H-pyrrolo[2,3-b]pyridine and 5-methoxypyridin-2-amine

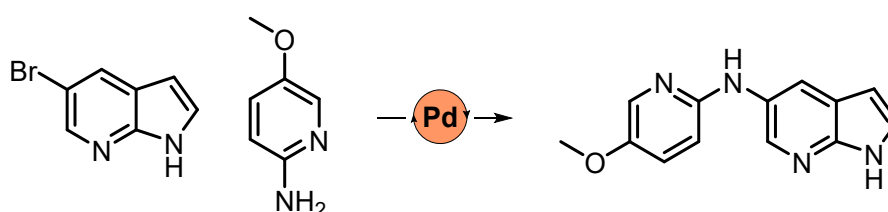

**MISER Analysis: 5-methoxy-N-{1H-pyrrolo[2,3-b]pyridin-5-yl}pyridin-2-amine (Desired Product)**

Max response: 328926.25

m/z: 241

|   | 1     | 2    | 3    | 4     | 5     | 6      | 7    | 8    | 9    | 10    | 11    | 12    |
|---|-------|------|------|-------|-------|--------|------|------|------|-------|-------|-------|
| A | 49.71 | 0.00 | 0.00 | 4.16  | 10.62 | 0.00   | 0.00 | 0.00 | 0.00 | 0.00  | 3.95  | 25.74 |
| B | 22.86 | 0.00 | 0.00 | 75.29 | 0.00  | 100.00 | 4.31 | 0.00 | 0.00 | 81.60 | 0.00  | 44.81 |
| C | 0.00  | 0.00 | 0.00 | 23.89 | 0.00  | 0.00   | 0.00 | 0.00 | 0.00 | 0.00  | 84.74 | 33.48 |
| D | 0.00  | 0.00 | 0.00 | 18.23 | 0.00  | 0.00   | 0.00 | 0.00 | 0.00 | 4.22  | 0.00  | 0.00  |
| E | 0.00  | 0.00 | 0.00 | 0.00  | 0.00  | 0.00   | 0.00 | 0.00 | 0.00 | 0.00  | 4.26  | 27.75 |
| F | 0.00  | 0.00 | 0.00 | 8.28  | 0.00  | 0.00   | 0.00 | 0.00 | 0.00 | 0.00  | 0.00  | 13.76 |
| G | 0.00  | 0.00 | 0.00 | 0.00  | 0.00  | 0.00   | 0.00 | 0.00 | 0.00 | 0.00  | 0.00  | 0.00  |
| H | 0.00  | 0.00 | 0.00 | 0.00  | 0.00  | 0.00   | 0.00 | 0.00 | 0.00 | 0.00  | 0.00  | 0.00  |

**Legend**

|                      |
|----------------------|
| 66.7% ≤ val < 100.0% |
| 33.3% ≤ val < 66.7%  |
| 0.0% ≤ val < 33.3%   |

| Well | MISER result desired product (%) | LCAP (%) | LCMS spectra |
|------|----------------------------------|----------|--------------|
| B6   | 100.00                           | 73.3     |              |
| C11  | 84.74                            | 72.2     |              |

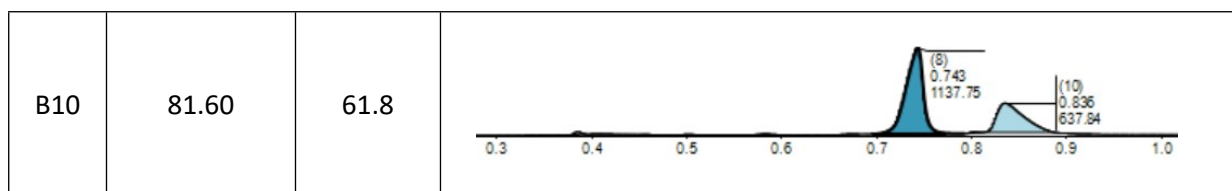

Buchwald amide and oxygen screening kit (amide); 1-bromo-4-methoxybenzene and pyridine-3-carboxamide

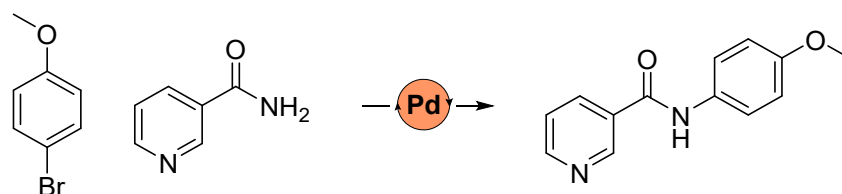

MISER Analysis: N-(4-methoxyphenyl)pyridine-3-carboxamide (Desired Product)

Max response: 1890096.00

m/z: 229

|   | 1     | 2     | 3    | 4     | 5     | 6    | 7      | 8     | 9     | 10    | 11    | 12   |
|---|-------|-------|------|-------|-------|------|--------|-------|-------|-------|-------|------|
| A | 48.33 | 27.09 | 2.26 | 11.11 | 12.91 | 0.00 | 6.35   | 60.16 | 13.41 | 3.99  | 18.08 | 0.00 |
| B | 0.80  | 1.54  | 0.00 | 0.00  | 0.00  | 0.00 | 21.42  | 29.27 | 2.24  | 0.00  | 0.00  | 0.00 |
| C | 6.20  | 22.39 | 1.66 | 0.00  | 0.00  | 0.00 | 100.00 | 76.43 | 8.12  | 0.00  | 0.00  | 0.00 |
| D | 0.00  | 0.00  | 0.00 | 23.96 | 53.43 | 1.27 | 0.00   | 0.00  | 0.00  | 76.86 | 61.11 | 6.00 |
| E | 0.00  | 0.00  | 0.00 | 2.74  | 1.32  | 0.00 | 0.00   | 0.56  | 0.00  | 0.00  | 0.00  | 0.00 |
| F | 1.29  | 1.58  | 1.08 | 1.17  | 1.48  | 0.00 | 30.31  | 16.39 | 0.00  | 14.54 | 7.38  | 1.64 |
| G | 4.64  | 1.77  | 0.00 | 0.65  | 0.00  | 0.00 | 1.53   | 48.00 | 3.28  | 5.18  | 2.05  | 0.00 |
| H | 0.00  | 0.00  | 0.00 | 1.61  | 2.04  | 0.00 | 0.00   | 0.62  | 0.00  | 0.00  | 2.72  | 0.97 |

Legend

66.7% ≤ val < 100.0%

33.3% ≤ val < 66.7%

0.0% ≤ val < 33.3%

| Well | MISER result desired product (%) | LCAP (%) | LCMS spectra |
|------|----------------------------------|----------|--------------|
| C7   | 100.00                           | 98.5     |              |
| D10  | 76.86                            | 98.1     |              |
| C8   | 81.60                            | 97.8     |              |



Buchwald amide and oxygen screening kit (oxygen); 6-chloroquinoline and tert-butyl 3-hydroxyazetidide-1-carboxylate

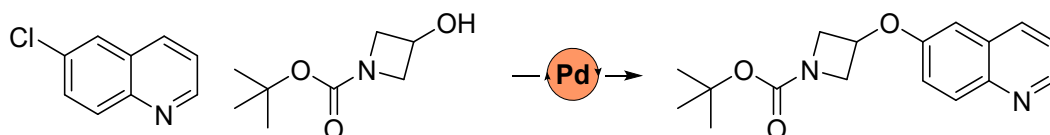

MISER Analysis: tert-butyl 3-(quinolin-6-yloxy)azetidide-1-carboxylate (Desired Product)

Max response: 730117.75

m/z: 301

|   | 1      | 2     | 3    | 4     | 5     | 6    | 7     | 8     | 9    | 10    | 11    | 12   |
|---|--------|-------|------|-------|-------|------|-------|-------|------|-------|-------|------|
| A | 74.79  | 62.43 | 2.12 | 34.18 | 6.38  | 2.02 | 14.09 | 2.64  | 0.00 | 0.00  | 0.00  | 0.00 |
| B | 91.17  | 1.90  | 0.00 | 0.00  | 0.00  | 0.00 | 13.95 | 1.92  | 0.00 | 0.00  | 0.00  | 0.00 |
| C | 19.63  | 31.07 | 0.00 | 0.00  | 0.00  | 0.00 | 2.68  | 2.90  | 0.00 | 0.00  | 0.00  | 0.00 |
| D | 1.45   | 0.00  | 0.00 | 1.85  | 65.13 | 0.00 | 0.00  | 0.00  | 0.00 | 0.00  | 13.16 | 1.98 |
| E | 29.38  | 8.17  | 0.00 | 0.00  | 6.93  | 0.00 | 0.00  | 0.00  | 0.00 | 11.82 | 0.00  | 0.00 |
| F | 31.84  | 3.96  | 0.00 | 8.81  | 0.00  | 0.00 | 3.10  | 0.00  | 0.00 | 44.99 | 0.00  | 0.00 |
| G | 100.00 | 2.77  | 0.00 | 1.95  | 0.00  | 0.00 | 0.00  | 14.02 | 0.00 | 1.44  | 1.92  | 0.00 |
| H | 5.27   | 0.00  | 0.00 | 3.40  | 49.59 | 0.00 | 0.00  | 0.00  | 0.00 | 0.00  | 18.69 | 0.00 |

Legend  
 66.7% ≤ val <100.0%  
 33.3% ≤ val <66.7%  
 0.0% ≤ val <33.3%

| Well | MISER result desired product (%) | LCAP (%) | LCMS spectra |
|------|----------------------------------|----------|--------------|
| C1   | 100.00                           | 56.7     |              |
| F1   | 79.74                            | 26.5     |              |
| A1   | 67.33                            | 31.7     |              |

SNAr screening plate:

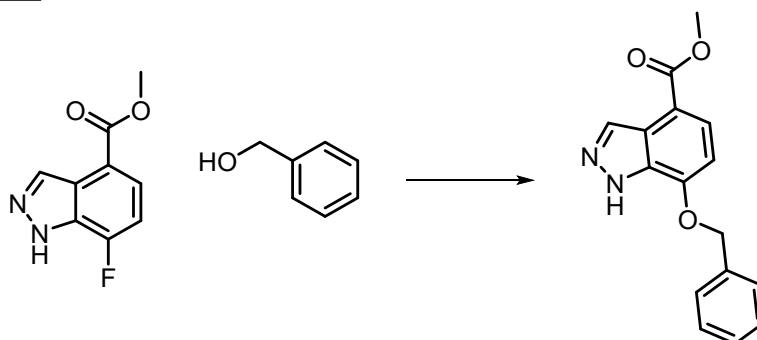

MISER Analysis: methyl 7-(benzyloxy)-1H-indazole-4-carboxylate (Desired Product)

Max response: 365728.12

m/z: 281

|   | 1     | 2    | 3    | 4    | 5    | 6    | 7    | 8    | 9    | 10     | 11   | 12   |
|---|-------|------|------|------|------|------|------|------|------|--------|------|------|
| A | 0.00  | 0.00 | 0.00 | 0.00 | 0.00 | 0.00 | 0.00 | 0.00 | 0.00 | 0.00   | 0.00 | 0.00 |
| B | 0.00  | 0.00 | 0.00 | 0.00 | 0.00 | 0.00 | 0.00 | 0.00 | 0.00 | 0.00   | 0.00 | 0.00 |
| C | 0.00  | 0.00 | 0.00 | 0.00 | 0.00 | 0.00 | 0.00 | 0.00 | 0.00 | 0.00   | 0.00 | 0.00 |
| D | 0.00  | 0.00 | 0.00 | 0.00 | 0.00 | 0.00 | 0.00 | 0.00 | 0.00 | 0.00   | 0.00 | 0.00 |
| E | 0.00  | 0.00 | 0.00 | 0.00 | 0.00 | 0.00 | 0.00 | 0.00 | 0.00 | 0.00   | 0.00 | 0.00 |
| F | 59.54 | 3.93 | 0.00 | 0.00 | 0.00 | 0.00 | 1.38 | 0.00 | 5.63 | 100.00 | 0.00 | 0.00 |
| G | 0.00  | 0.00 | 0.00 | 0.00 | 0.00 | 0.00 | 0.00 | 0.00 | 0.00 | 0.00   | 0.00 | 0.00 |
| H | 1.94  | 1.01 | 0.00 | 0.00 | 0.00 | 0.00 | 0.00 | 0.00 | 0.00 | 0.00   | 0.00 | 0.00 |

**Legend**  
 66.7% ≤ val <100.0%  
 33.3% ≤ val <66.7%  
 0.0% ≤ val <33.3%

MISER Analysis: 1H-INDAZOLE-4-CARBOXYLIC ACID, 7-FLUORO-, METHYL ESTER (BT301412,FRIDGE F) (Reactant)

Max response: 429213.84

m/z: 193

|   | 1      | 2     | 3     | 4    | 5     | 6     | 7     | 8     | 9     | 10    | 11    | 12    |
|---|--------|-------|-------|------|-------|-------|-------|-------|-------|-------|-------|-------|
| A | 100.00 | 15.56 | 11.85 | 7.28 | 73.52 | 46.35 | 48.12 | 26.24 | 74.50 | 27.72 | 90.52 | 48.05 |
| B | 8.13   | 11.65 | 7.10  | 5.73 | 34.54 | 25.16 | 5.27  | 5.72  | 24.94 | 7.01  | 35.35 | 41.44 |
| C | 7.21   | 1.80  | 5.44  | 6.64 | 51.14 | 49.78 | 6.08  | 4.58  | 10.91 | 3.72  | 32.31 | 6.17  |
| D | 50.69  | 21.84 | 25.80 | 6.78 | 34.01 | 29.41 | 23.00 | 38.42 | 47.48 | 26.08 | 34.54 | 34.17 |
| E | 33.77  | 42.28 | 3.02  | 4.09 | 6.22  | 7.57  | 47.25 | 25.87 | 42.39 | 67.12 | 0.00  | 6.04  |
| F | 0.00   | 4.65  | 0.00  | 0.00 | 0.00  | 0.00  | 0.00  | 0.00  | 0.00  | 1.31  | 1.28  | 0.00  |
| G | 50.40  | 54.16 | 1.40  | 5.03 | 5.56  | 0.00  | 70.33 | 41.70 | 66.47 | 42.58 | 4.56  | 2.03  |
| H | 0.00   | 2.09  | 0.00  | 0.00 | 0.00  | 0.00  | 0.00  | 0.00  | 0.00  | 0.00  | 0.00  | 0.00  |

**Legend**  
 0.0% ≤ val <33.3%  
 33.3% ≤ val <66.7%  
 66.7% ≤ val <100.0%

| Well | MISER result (%) | LCAP (%) | LCMS spectra |
|------|------------------|----------|--------------|
| F10  | 100.00           | 33.0     |              |
| F1   | 59.54            | 40.0     |              |

The peak with a retention time of 1.17 min represents the trans esterified product ( $m/z$  359.4), where the desired product has reacted with excess benzyl alcohol to give the benzylated ester.

### Batch scale-up reactions and characterization data

#### 5-(2-fluorophenyl)-1H-pyrrolo[2,3-b]pyridine (3)

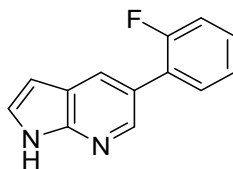

**Conditions identified on the plate:** 5-bromo-1H-pyrrolo[2,3-b]pyridine (49.3 mg, 0.25 mmol), (2-fluorophenyl)boronic acid (52.5 mg, 0.38 mmol), APhos-Pd-G3 (3.90 mg, 0.005 mmol, 2 mol%) and CsF (76.0 mg, 0.50 mmol) were weighed into a crimp top glass vial (2–5 mL vial Biotage, 354833) equipped with a magnetic stir bar. *t*-AmOH:water (4:1, 2.50 mL, 0.1 M) was added to the vial, which was then heated to 80 °C for 16 h. Crude reaction LCAP for desired product = 86%. The crude product was purified (10g Sfar cartridge, 0–100% EtOAc/Petrol v/v) to afford the title compound as a yellow solid (47.2 mg, 89% yield).

**Closest literature conditions<sup>1</sup>:** 5-bromo-1H-pyrrolo[2,3-b]pyridine (49.3 mg, 0.25 mmol), (2-fluorophenyl)boronic acid (52.5 mg, 0.38 mmol), Pd(dppf)Cl<sub>2</sub> (3.66 mg, 0.005 mmol, 2 mol%) and K<sub>2</sub>CO<sub>3</sub> (69.2 mg, 0.50 mmol) were weighed into a crimp top glass vial (2–5 mL vial Biotage, 354833) equipped with a magnetic stir bar. Dioxane–water (4:1, 2.50 mL, 0.1 M) was added to the vial, which was then heated to 120 °C for 12 h. Crude reaction LCAP for desired product = 10%. The crude product was purified (10g Sfar cartridge, 0–100% EtOAc/Petrol v/v) to afford the title compound as a cream solid (3.0 mg, 6% yield).

**<sup>1</sup>H NMR** (400 MHz, DMSO-*d*<sub>6</sub>) δ 11.77 (s, 1H), 8.37 (d, *J* = 2.1 Hz, 1H), 8.11 (dd, *J* = 2.2, 0.8 Hz, 1H), 7.59 (dd, *J* = 7.6, 1.9 Hz, 1H), 7.53 (dd, *J* = 3.5, 2.5 Hz, 1H), 7.42 (ddd, *J* = 8.6, 7.0, 1.8 Hz, 1H), 7.32 (ddd, *J* = 8.7, 7.3, 1.4 Hz, 2H), 6.52 (dd, *J* = 3.5, 1.8 Hz, 1H).

**<sup>13</sup>C NMR** (101 MHz, DMSO-*d*<sub>6</sub>) δ 159.2 (d, *J* = 245.0 Hz), 147.9, 142.7 (d, *J* = 3.3 Hz), 131.2 (d, *J* = 3.3 Hz), 129.2 (d, *J* = 8.2 Hz), 128.2 (d, *J* = 2.8 Hz), 127.0, 126.9 (d, *J* = 13.7 Hz), 125.0 (d, *J* = 3.4 Hz), 122.8, 119.9, 116.0 (d, *J* = 22.7 Hz), 100.2.

**<sup>19</sup>F NMR** (376 MHz, DMSO-*d*<sub>6</sub>) δ -118.66.

**HRMS** (ESI-QTOF):  $m/z$  [M+H]<sup>+</sup> Calcd for C<sub>13</sub>H<sub>9</sub>FN<sub>2</sub> 213.0822; Found 213.0827. Δ = 2.24 ppm

*N*-[(pyridin-4-yl)methyl]-1H-pyrrolo[2,3-*b*]pyridin-5-amine (**4**)

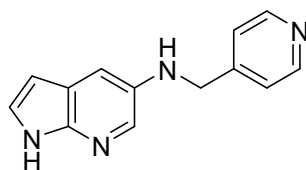

**Conditions identified on the plate:** 5-bromo-1H-pyrrolo[2,3-*b*]pyridine (49.3 mg, 0.25 mmol), 4-picolylamine (25.4  $\mu$ L, 0.38 mmol), AdBrettPhos-Pd-G3 (5.06 mg, 0.005 mmol, 2 mol%) and *t*-BuOK (56.2 mg, 0.50 mmol) were weighed into a crimp top glass vial (2–5 mL vial Biotage, 354833) equipped with a magnetic stir bar which was degassed by N<sub>2</sub> sparging (5–10 mins). Anhydrous dioxane (2.50 mL, 0.1 M) was added to the vial, which was then heated to 80 °C for 16 h. Crude reaction LCAP for desired product = 92%. The crude material was purified (11g KPNH Sfar cartridge, 0–100% EtOAc/Petrol v/v then 0–20% MeOH/EtOAc v/v) to afford the title compound as a pale-yellow oil (51.7 mg, 92% yield).

**Closest literature conditions**<sup>2</sup>: 5-bromo-1H-pyrrolo[2,3-*b*]pyridine (49.3 mg, 0.25 mmol), *tert*-butyl piperazine-1-carboxylate (69.9 mg, 0.38 mmol) and BrettPhos-Pd-G3 (2.27 mg, 0.005 mmol, 2 mol%) were weighed into a crimp top glass vial (2–5 mL vial Biotage, 354833) equipped with a magnetic stir bar which was degassed by N<sub>2</sub> sparging (5–10 mins). Anhydrous THF (2.0 mL, 0.1 M) and LiHMDS (1 M in THF, 0.5 mL, 0.50 mmol) were added to the vial, which was then heated to 80 °C for 16 h. LCMS indicated that no reaction had taken place, therefore no more was done with this sample.

**<sup>1</sup>H NMR** (400 MHz, DMSO-*d*<sub>6</sub>)  $\delta$  11.13 (s, 1H), 8.53 – 8.46 (m, 2H), 7.81 (d, *J* = 2.6 Hz, 1H), 7.42 – 7.36 (m, 2H), 7.24 (t, *J* = 2.9 Hz, 1H), 6.98 – 6.92 (m, 1H), 6.15 (dd, *J* = 3.3, 1.9 Hz, 1H), 6.06 (t, *J* = 6.3 Hz, 1H), 4.35 (d, *J* = 6.2 Hz, 2H).

**<sup>13</sup>C NMR** (101 MHz, DMSO-*d*<sub>6</sub>)  $\delta$  149.8, 149.5, 142.7, 138.9, 132.3, 125.6, 122.4, 119.6, 108.9, 98.5, 46.3.

**HRMS** (ESI-QTOF): *m/z* [M+H]<sup>+</sup> Calcd for C<sub>13</sub>H<sub>12</sub>N<sub>4</sub> 225.1135; Found 225.1143.  $\Delta$  = 3.65 ppm

*N*-(2-phenylpropan-2-yl)isoquinolin-5-amine (5)

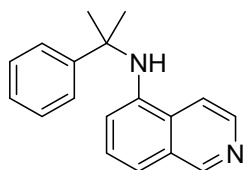

**Conditions identified on the plate:** 5-bromoisoquinoline (52.0 mg, 0.25 mmol), cumylamine (50.7 mg, 0.38 mmol), <sup>t</sup>BuPhCPhos-Pd-G4 (3.94 mg, 0.005 mmol, 2 mol%) and t-BuOK (56.2 mg, 0.50 mmol) were weighed into a crimp top glass vial (2–5 mL vial Biotage, 354833) equipped with a magnetic stir bar which was degassed by N<sub>2</sub> sparging (5–10 mins). Anhydrous t-AmOH (2.50 mL, 0.1 M) was added to the vial, which was then heated to 80 °C for 16 h. Crude reaction LCAP for desired product = 76%. The crude material was purified (10g Sfar cartridge, 0–100% EtOAc/Petrol v/v then 0–20% MeOH/EtOAc v/v) to afford the title compound as a pale-yellow oil (27.1 mg, 41.3% yield).

**Closest literature conditions<sup>3</sup>:** 5-bromoisoquinoline (52.0 mg, 0.25 mmol), cumylamine (50.7 mg, 0.38 mmol), <sup>t</sup>BuPhCPhos-Pd-G4 (3.94 mg, 0.005 mmol, 2 mol%) and t-BuOK (56.2 mg, 0.50 mmol) were weighed into a crimp top glass vial (2–5 mL vial Biotage, 354833) equipped with a magnetic stir bar which was degassed by N<sub>2</sub> sparging (5–10 mins). Anhydrous dioxane (2.0 mL, 0.1 M) were added to the vial, which was then heated to 80 °C for 16 h. Crude reaction LCAP for desired product = 7%. The crude product was purified (10g Sfar cartridge, 0–100% EtOAc/Petrol v/v then 0–20% MeOH/EtOAc v/v) but no material was successfully isolated.

**<sup>1</sup>H NMR** (400 MHz, DMSO-*d*<sub>6</sub>) δ 9.09 (d, *J* = 0.9 Hz, 1H), 8.43 (d, *J* = 6.0 Hz, 1H), 8.27 (d, *J* = 6.0 Hz, 1H), 7.49 – 7.44 (m, 2H), 7.31 (dd, *J* = 8.4, 7.0 Hz, 2H), 7.19 (ddt, *J* = 15.1, 8.6, 1.1 Hz, 2H), 7.11 (t, *J* = 7.9 Hz, 1H), 6.31 (s, 1H), 6.07 (dd, *J* = 7.7, 1.1 Hz, 1H), 1.72 (s, 6H).

**<sup>13</sup>C NMR** (101 MHz, DMSO-*d*<sub>6</sub>) δ 152.0, 147.1, 141.0, 140.4, 129.2, 128.5, 127.4, 126.4, 126.2, 125.2, 115.4, 114.3, 110.7, 55.7, 29.8.

**HRMS** (ESI-QTOF): *m/z* [M+H]<sup>+</sup> Calcd for C<sub>18</sub>H<sub>18</sub>N<sub>2</sub> 263.1543; Found 263.1549. Δ = 2.43 ppm

tert-Butyl 4-{1H-pyrrolo[2,3-b]pyridin-5-yl}piperazine-1-carboxylate (9)

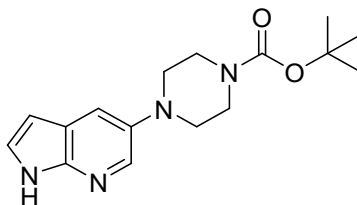

**Conditions identified on the plate:** 5-bromo-1H-pyrrolo[2,3-b]pyridine (49.3 mg, 0.25 mmol), tert-butyl piperazine-1-carboxylate (69.9 mg, 0.38 mmol), [BippyPhos Pd(allyl)]OTf (4.02 mg, 0.005 mmol, 2 mol%) and KHMDS (99.8 mg, 0.50 mmol) were weighed into a crimp top glass vial (2–5 mL vial Biotage, 354833) equipped with a magnetic stir bar which was degassed by N<sub>2</sub> sparging (5–10 mins). Anhydrous dioxane (2.50 mL, 0.1 M) was added to the vial, which was then heated to 80 °C for 16 h. Crude reaction LCAP for desired product = 60%. The crude product was purified (10g Sfar cartridge, 0–100% EtOAc/Petrol v/v) to afford the title compound as a colourless solid (46.3 mg, 61% yield).

**Closest literature conditions<sup>2</sup>:** 5-bromo-1H-pyrrolo[2,3-b]pyridine (49.3 mg, 0.25 mmol), tert-butyl piperazine-1-carboxylate (69.9 mg, 0.38 mmol) and RuPhos-Pd-G4 (4.54 mg, 0.005 mmol, 2 mol%) were weighed into a crimp top glass vial (2–5 mL vial Biotage, 354833) equipped with a magnetic stir bar which was degassed by N<sub>2</sub> sparging (5–10 mins). Anhydrous THF (2.0 mL, 0.1 M) and LiHMDS (1 M in THF, 0.5 mL, 0.50 mmol) were added to the vial, which was then heated to 80 °C for 16 h. Crude reaction LCAP for desired product = 37%. The crude product was purified (10g Sfar cartridge, 0–100% EtOAc/Petrol v/v) to afford the title compound as a colourless solid (31.0 mg, 41% yield).

**<sup>1</sup>H NMR** (400 MHz, DMSO-*d*<sub>6</sub>) δ 11.38 (s, 1H), 8.07 (d, *J* = 2.6 Hz, 1H), 7.52 (dd, *J* = 2.7, 0.7 Hz, 1H), 7.38 (dd, *J* = 3.4, 2.5 Hz, 1H), 6.33 (dd, *J* = 3.4, 1.9 Hz, 1H), 3.50 (t, *J* = 5.1 Hz, 4H), 3.06 – 2.99 (m, 4H), 1.44 (s, 9H).

**<sup>13</sup>C NMR** (101 MHz, DMSO-*d*<sub>6</sub>) δ 154.3, 144.8, 142.6, 137.0, 126.8, 119.9, 116.4, 99.8, 79.4, 51.6, 28.6.

**HRMS** (ESI-QTOF): *m/z* [M+H]<sup>+</sup> Calcd for C<sub>16</sub>H<sub>22</sub>N<sub>4</sub>O<sub>2</sub> 303.1812; Found 303.182. Δ = 2.65 ppm

5-methoxy-N-{1H-pyrrolo[2,3-b]pyridin-5-yl}pyridin-2-amine (10)

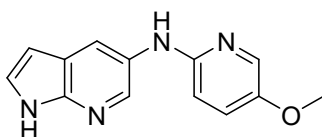

**Conditions identified on the plate:** 5-bromo-1H-pyrrolo[2,3-b]pyridine (49.3 mg, 0.25 mmol), 5-methoxypyridin-2-amine (46.6 mg, 0.38 mmol), BrettPhos-Pd-G4 (4.54 mg, 0.005 mmol, 2 mol%) and t-BuOK (56.2 mg, 0.50 mmol) were weighed into a crimp top glass vial (2–5 mL vial Biotage, 354833) equipped with a magnetic stir bar which was degassed by N<sub>2</sub> sparging (5–10 mins). Anhydrous dioxane (2.50 mL, 0.1 M) was added to the vial, which was then heated to 80 °C for 16 h. Crude reaction LCAP for desired product = 76%. The crude product was purified (10g Sfar cartridge, 0–100% EtOAc/Petrol v/v) to afford the title compound as a beige solid (52.0 mg, 86% yield).

**Closest literature conditions<sup>2</sup>:** 5-bromo-1H-pyrrolo[2,3-b]pyridine (49.3 mg, 0.25 mmol), 5-methoxypyridin-2-amine (46.6 mg, 0.38 mmol) and BrettPhos-Pd-G3 (4.54 mg, 0.005 mmol, 2 mol%) were weighed into a crimp top glass vial (2–5 mL vial Biotage, 354833) equipped with a magnetic stir bar which was degassed by N<sub>2</sub> sparging (5–10 mins). Anhydrous dioxane (2.50 mL, 0.1 M) and LiHMDS (1 M in THF, 0.5 mL, 0.50 mmol) were added to the vial, which was then heated to 80 °C for 16 h. Crude reaction LCAP for desired product = 46%. The crude product was purified (10g Sfar cartridge, 0–100% EtOAc/Petrol v/v) to afford the title compound as a beige solid (30.2 mg, 50% yield).

**<sup>1</sup>H NMR** (400 MHz, DMSO-*d*<sub>6</sub>) δ 11.35 (s, 1H), 8.62 (s, 1H), 8.32 (dd, *J* = 2.4, 0.7 Hz, 1H), 8.25 (d, *J* = 2.4 Hz, 1H), 7.87 (dd, *J* = 3.1, 0.7 Hz, 1H), 7.37 (dd, *J* = 3.4, 2.5 Hz, 1H), 7.28 (dd, *J* = 9.0, 3.1 Hz, 1H), 6.78 (dd, *J* = 9.0, 0.7 Hz, 1H), 6.36 (dd, *J* = 3.4, 1.9 Hz, 1H), 3.75 (s, 3H).

**<sup>13</sup>C NMR** (101 MHz, DMSO-*d*<sub>6</sub>) δ 151.4, 148.8, 144.2, 136.1, 132.3, 132.2, 126.2, 125.4, 119.3, 117.1, 110.6, 99.4, 56.0.

**HRMS** (ESI-QTOF): *m/z* [M+H]<sup>+</sup> Calcd for C<sub>13</sub>H<sub>12</sub>N<sub>4</sub>O 241.1085; Found 241.1086. Δ = 0.24 ppm.

N-(4-methoxyphenyl)pyridine-3-carboxamide (11)

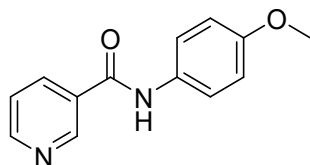

**Conditions identified on the plate:** 1-bromo-4-methoxybenzene (46.8 mg, 0.25 mmol), nicotinamide (45.8 mg, 0.38 mmol), AdBrettPhos-Pd-G3 (5.06 mg, 0.005 mmol, 2 mol%) and Cs<sub>2</sub>CO<sub>3</sub> (163.0 mg, 0.50 mmol) were weighed into a crimp top glass vial (2–5 mL vial Biotage, 354833) equipped with a magnetic stir bar which was degassed by N<sub>2</sub> sparging (5–10 mins). Anhydrous t-AmOH (2.50 mL, 0.1 M) was added to the vial, which was then heated to 80 °C for 16 h. Crude reaction LCAP for desired product = 92%. The crude material was dissolved in the minimum amount of EtOAc and a precipitate formed, which was collected under vacuum, washed with EtOAc, giving the title compound<sup>5</sup> as a cream solid (49.8 mg, 87% yield).

**Exact literature conditions**<sup>4</sup>: 1-bromo-4-methoxybenzene (46.8 mg, 0.25 mmol), nicotinamide (45.8 mg, 0.38 mmol), <sup>t</sup>BuBrettPhos-Pd-G3 (5.06 mg, 0.005 mmol, 2 mol%) and K<sub>3</sub>PO<sub>4</sub> (74.4 mg, 0.35 mmol) were weighed into a crimp top glass vial (2–5 mL vial Biotage, 354833) equipped with a magnetic stir bar which was degassed by N<sub>2</sub> sparging (5–10 mins). *t*-BuOH (0.5 mL, 0.5 M) was added to the vial, which was then heated to 110 °C for 6 h. Crude reaction LCAP for desired product = 86%. The crude material was dissolved in the minimum amount of EtOAc and a precipitate formed, which was collected under vacuum, washed with EtOAc, giving the title compound<sup>5</sup> as a cream solid (47.1 mg, 82% yield).

Characterization data matches the literature<sup>4</sup>

<sup>1</sup>H NMR (400 MHz, MeOD) δ 9.07 (dd, *J* = 2.3, 0.9 Hz, 1H), 8.71 (dd, *J* = 4.9, 1.6 Hz, 1H), 8.34 (ddd, *J* = 8.0, 2.3, 1.6 Hz, 1H), 7.63 – 7.54 (m, 3H), 6.98 – 6.90 (m, 2H), 3.81 (s, 3H).

<sup>13</sup>C NMR (101 MHz, MeOD) δ 166.2, 158.5, 152.7, 149.3, 137.2, 132.8, 132.4, 125.1, 124.0, 115.0, 55.9.

HRMS (ESI-QTOF): *m/z* [M+H]<sup>+</sup> Calcd for C<sub>13</sub>H<sub>12</sub>N<sub>2</sub>O<sub>2</sub> 229.0971; Found 229.0975. Δ = 1.66 ppm



tert-butyl 3-(quinolin-6-yloxy)azetidene-1-carboxylate (12)

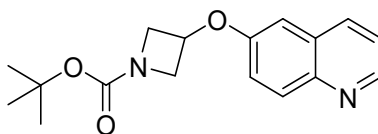

**Conditions identified on the plate:** 6-Chloroquinoline (40.9 mg, 0.25 mmol), 1-Boc-3-(hydroxy)azetidene (65.0 mg, 0.38 mmol),  $\text{Me}_3(\text{OMe})^t\text{BuXPhos Pd G3}$  (4.11 mg, 0.005 mmol, 2 mol%) and  $\text{Cs}_2\text{CO}_3$  (163.0 mg, 0.50 mmol) were weighed into a crimp top glass vial (2–5 mL vial Biotage, 354833) equipped with a magnetic stir bar which was degassed by  $\text{N}_2$  sparging (5–10 mins). Anhydrous toluene (2.50 mL, 0.1 M) was added to the vial, which was then heated to 80 °C for 16 h. Crude reaction LCAP for desired product = 89%. The crude product was purified by achiral SFC (20:80 MeOH: $\text{CO}_2$ ; 60mL/min) to afford the title compound as a sticky pale-yellow oil (63.0 mg, 84% yield).

**Exact literature conditions<sup>5</sup>:** The literature method uses AdCyBrettPhos-Pd-G3, which is not commercially available and thus would need to be synthesised, this is prohibitive, so this method cannot be repeated.

Characterization data matches the literature<sup>5</sup>

**<sup>1</sup>H NMR** (400 MHz, MeOD)  $\delta$  8.70 (dd,  $J = 4.4, 1.7$  Hz, 1H), 8.27 (ddd,  $J = 8.2, 1.7, 0.8$  Hz, 1H), 8.00 – 7.93 (m, 1H), 7.47 (ddd,  $J = 20.5, 8.8, 3.5$  Hz, 2H), 7.09 (d,  $J = 2.8$  Hz, 1H), 5.14 (tt,  $J = 6.4, 3.9$  Hz, 1H), 4.49 – 4.40 (m, 2H), 3.99 (dd,  $J = 10.4, 3.6$  Hz, 2H), 1.46 (s, 9H).

**<sup>13</sup>C NMR** (101 MHz, MeOD)  $\delta$  158.1, 156.4, 149.1, 145.1, 137.3, 131.0, 130.9, 123.9, 122.9, 107.9, 81.4, 67.5, 28.6.

**HRMS** (ESI-QTOF):  $m/z$   $[\text{M}+\text{H}]^+$  Calcd for  $\text{C}_{17}\text{H}_{20}\text{N}_2\text{O}_3$  301.1547; Found 301.1551.  $\Delta = 1.45$  ppm

methyl 7-(benzyloxy)-1H-indazole-4-carboxylate (15)

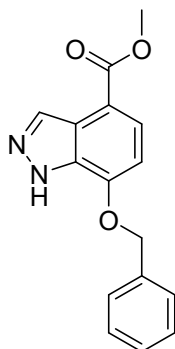

**Conditions identified on the plate:** Methyl 7-fluoro-1H-indazole-4-carboxylate (48.5 mg, 0.25 mmol), benzyl alcohol (40.5 mg, 0.38 mmol), KHMDS (199.0 mg, 0.5 mmol) and CsF (15.2 mg, 0.01 mmol) were weighed into a crimp top glass vial (2–5 mL vial Biotage, 354833) equipped with a magnetic stir bar. NMP (2.50 mL, 0.1 M) was added to the vial, which was then heated to 80 °C for 16 h. Again, in the LCMS of the crude reaction the trans esterified product was observed therefore MeOH (1 mL) was added, and the reaction was heated to 60 °C for 3 h. Crude reaction LCAP for desired product = 61%. The crude product was purified (10g Sfar cartridge, 0–100% EtOAc/Petrol v/v) to afford the title compound as a colourless oil (59.9 mg, 85% yield).

**Closest literature conditions:** There are no exact or similar reactions on SciFinder<sup>n</sup> for this heterocycle.

**<sup>1</sup>H NMR** (400 MHz, DMSO-*d*<sub>6</sub>) δ 13.74 – 13.69 (m, 1H), 8.37 – 8.33 (m, 1H), 7.80 (d, *J* = 8.0 Hz, 1H), 7.62 – 7.55 (m, 2H), 7.48 – 7.32 (m, 3H), 7.06 (d, *J* = 8.1 Hz, 1H), 5.41 (s, 2H), 3.89 (s, 3H).

**<sup>13</sup>C NMR** (101 MHz, DMSO-*d*<sub>6</sub>) δ 165.9, 148.4, 136.2, 134.1, 132.1, 128.5, 128.1, 127.8, 126.3, 122.9, 114.0, 105.6, 69.9, 51.7.

**HRMS** (ESI-QTOF): *m/z* [M+H]<sup>+</sup> Calcd for C<sub>16</sub>H<sub>14</sub>N<sub>2</sub>O<sub>3</sub> 283.1076; Found 283.1079. Δ = 0.93 ppm

### Experimental References

1. Kaneko, Takushi; et al. World Intellectual Property Organization, WO2021062316 A1 2021-04-01
2. Henderson, J. L. McDermott, S. M. Buchwald, S. L. *Org. Lett.*, **12**, 4438-4441 (2010).
3. Ruiz-Castillo, P. Blackmond, D. G. Buchwald, S. L. *J. Am. Chem. Soc.*, **137**, 3085-3092 (2015).
4. Fors, B. P. Dooleweerd, K. Zeng, Q. Buchwald, S. L. *Tetrahedron*, **65**, 6576–6583 (2009).
5. Zhang, H. Ruiz-Castillo, P. Schuppe, A. W., Buchwald, S. L. *Org. Lett.*, **22**, 14, 5369–5374 (2020).

# NMR spectra

## 5-(2-fluorophenyl)-1H-pyrrolo[2,3-b]pyridine (3)

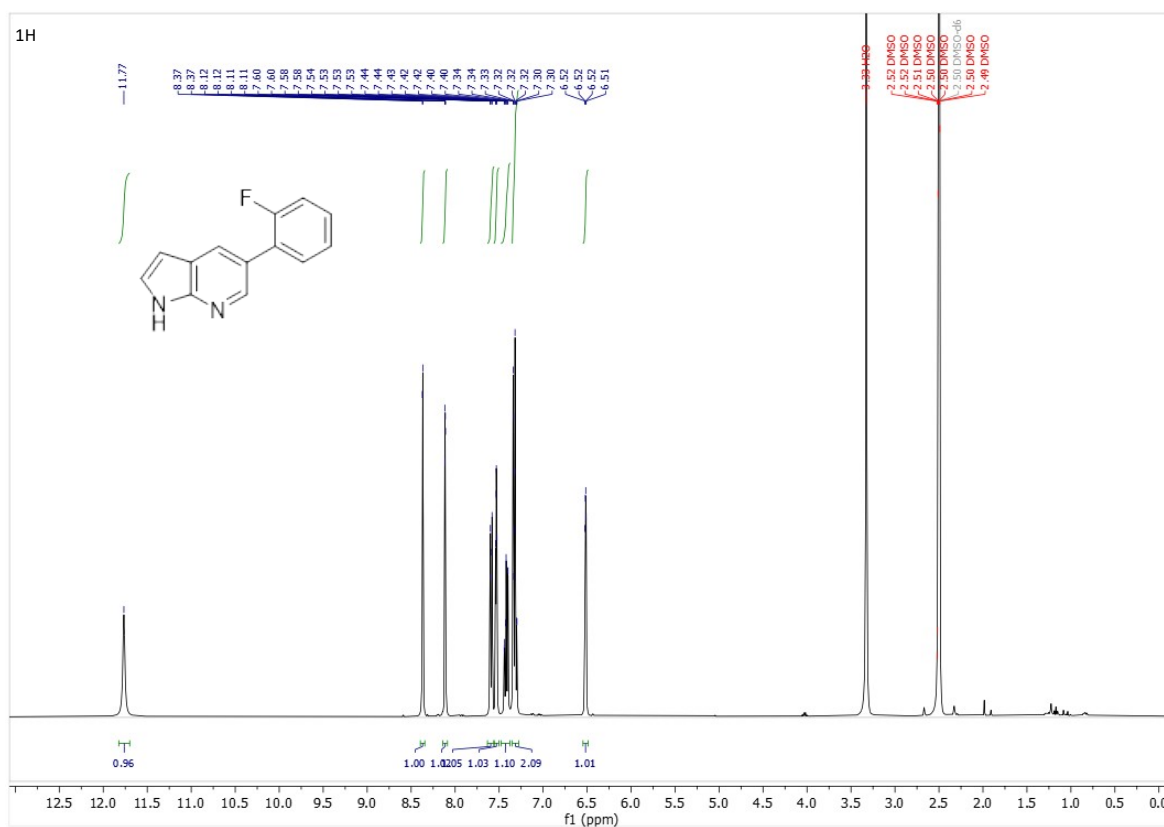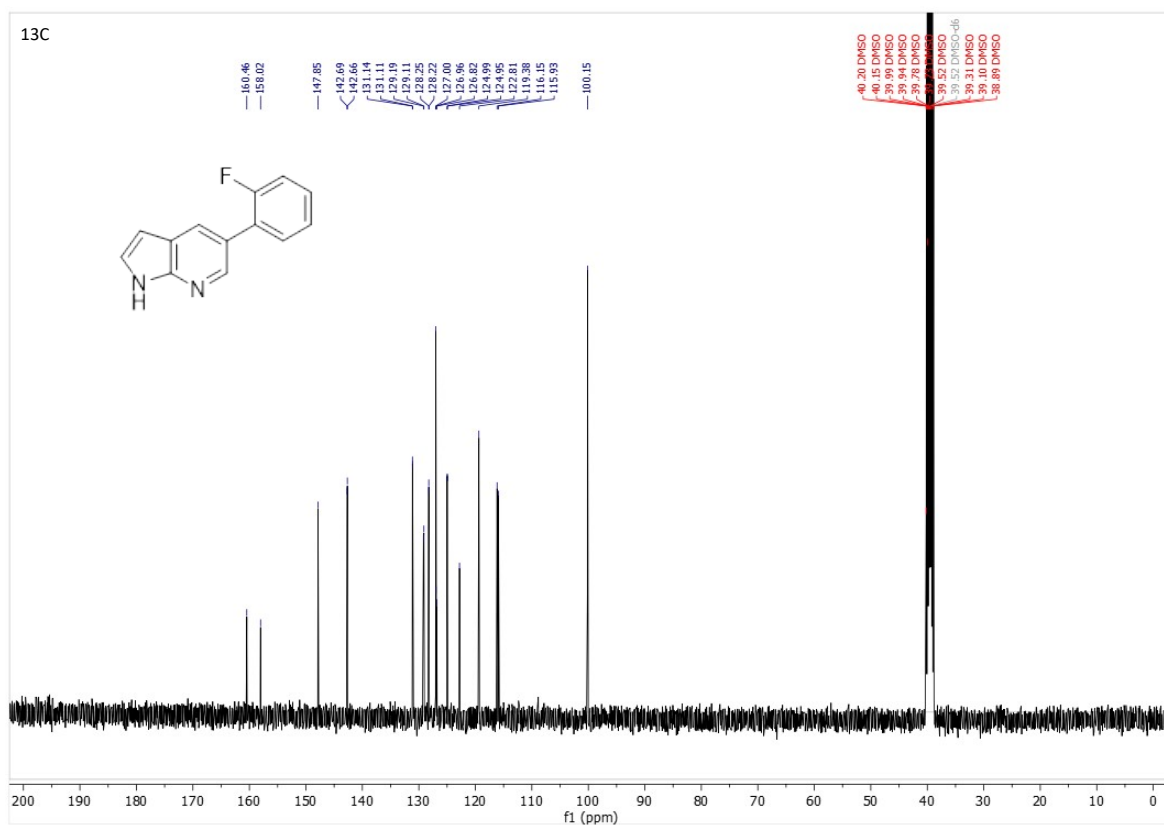

19F

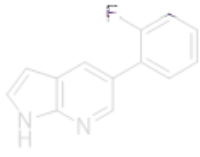

-118.66

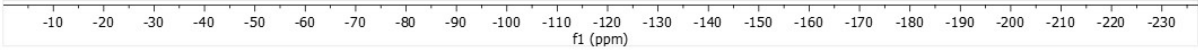

**N-[(pyridin-4-yl)methyl]-1H-pyrrolo[2,3-b]pyridin-5-amine (4)**

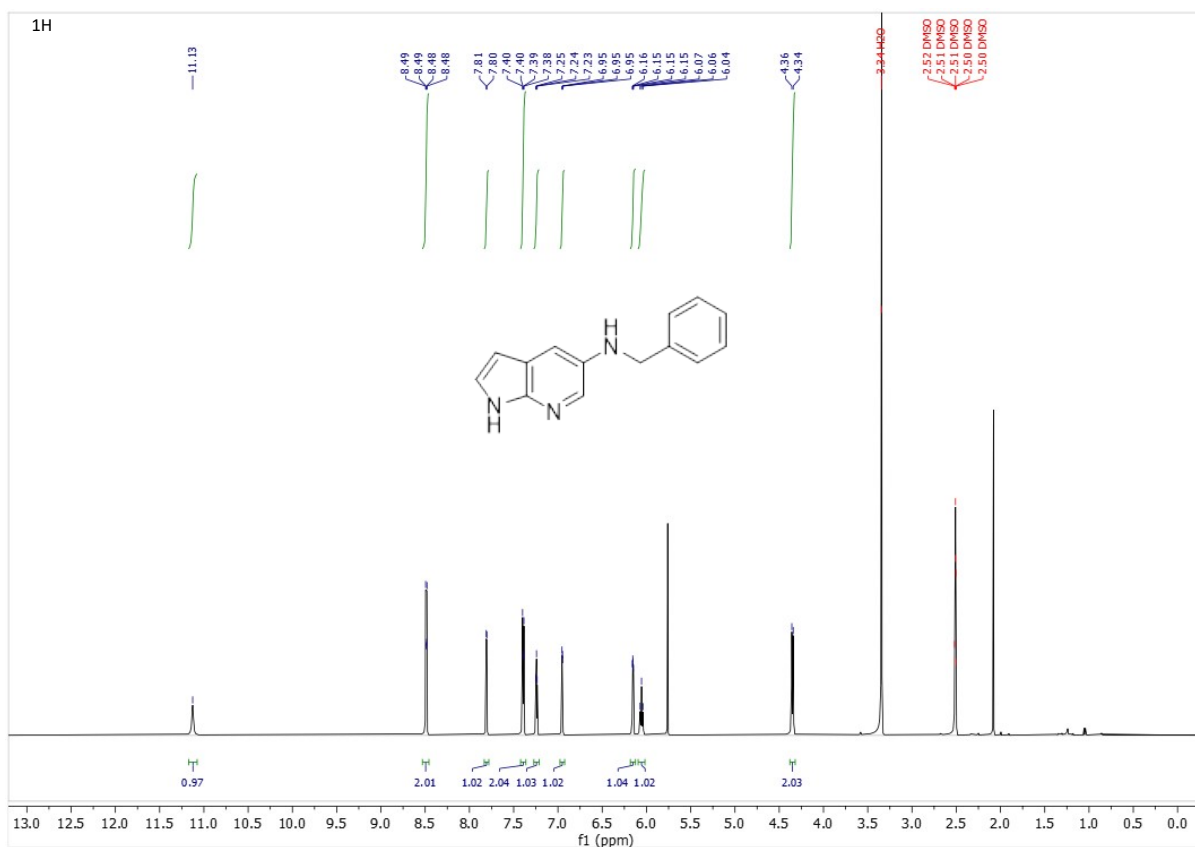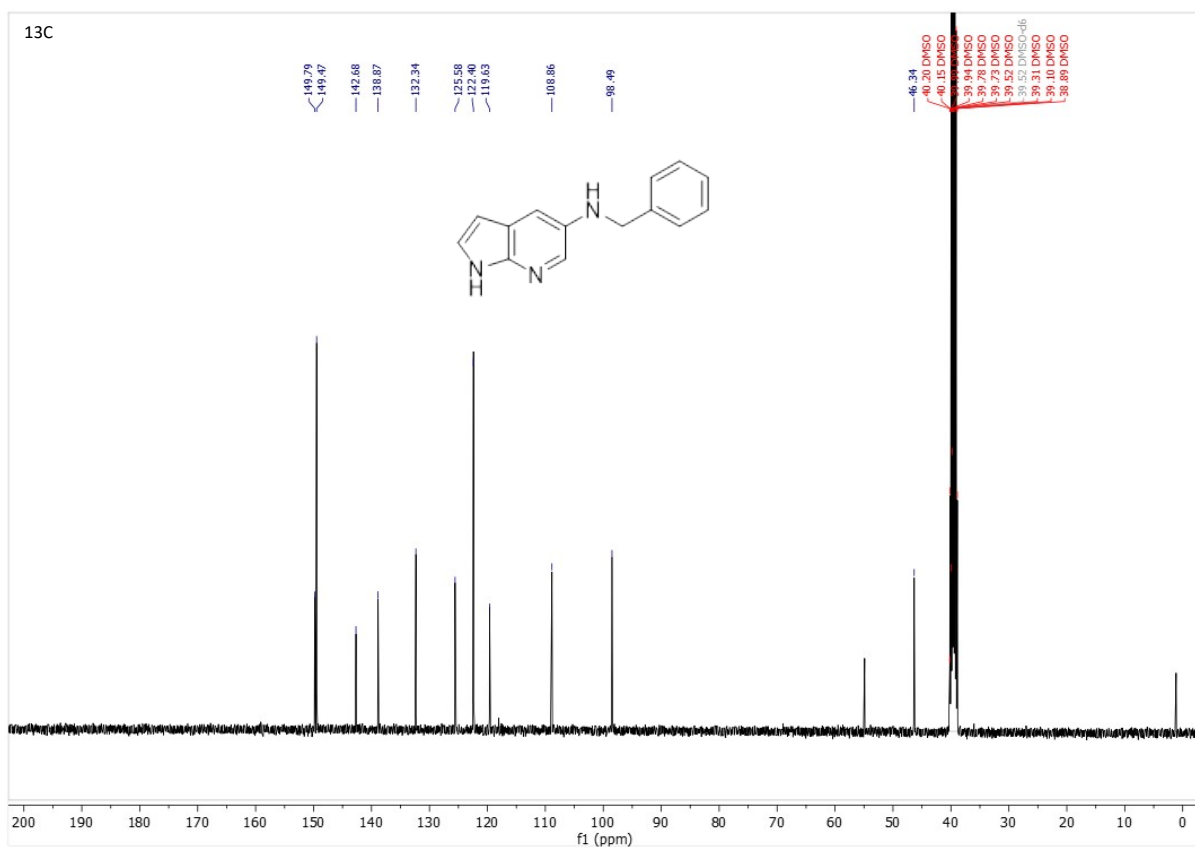

# N-(2-phenylpropan-2-yl)isoquinolin-5-amine (5)

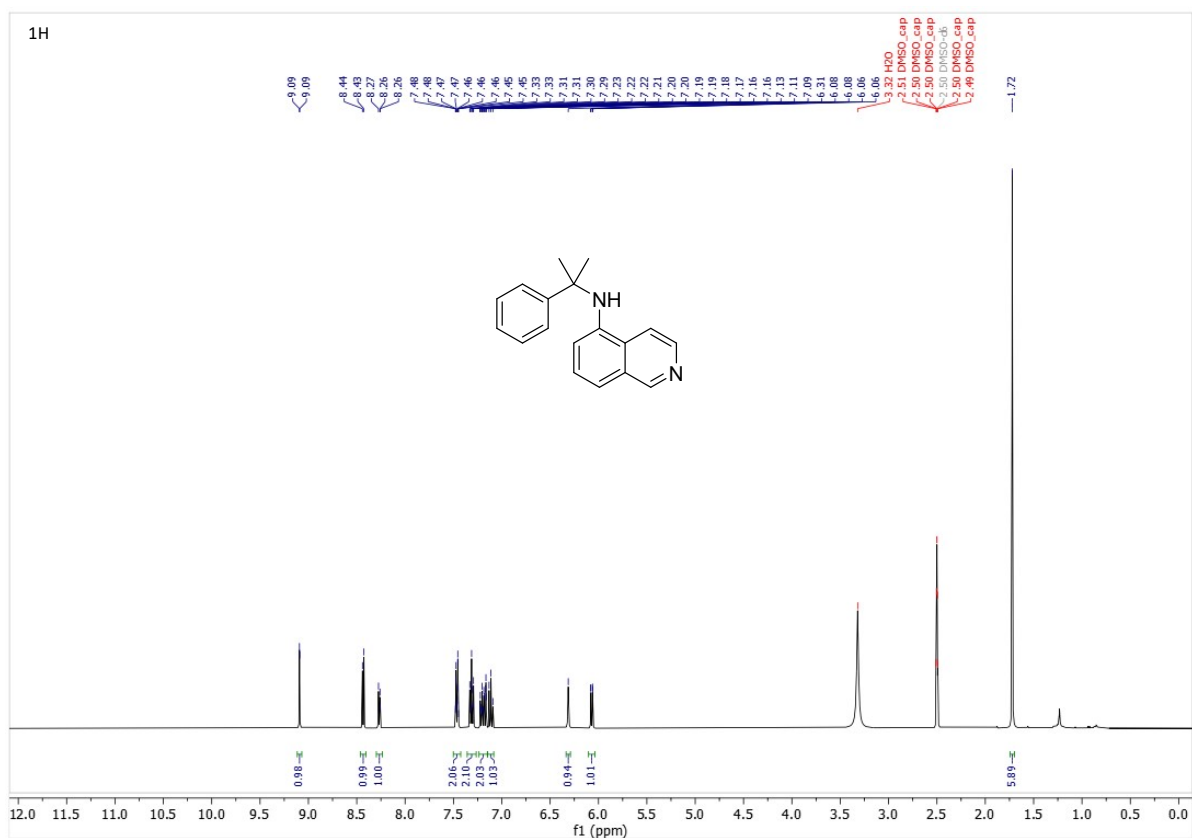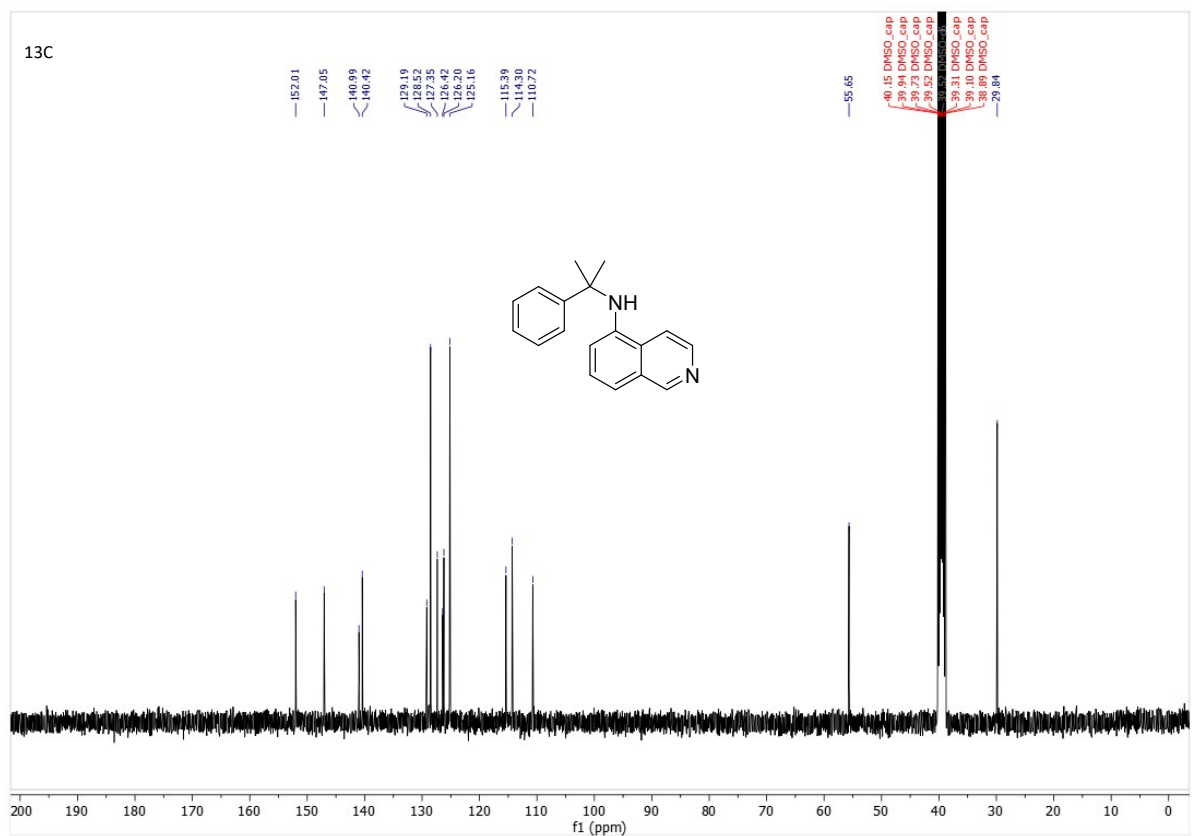

**tert-Butyl 4-{1H-pyrrolo[2,3-b]pyridin-5-yl}piperazine-1-carboxylate (9)**

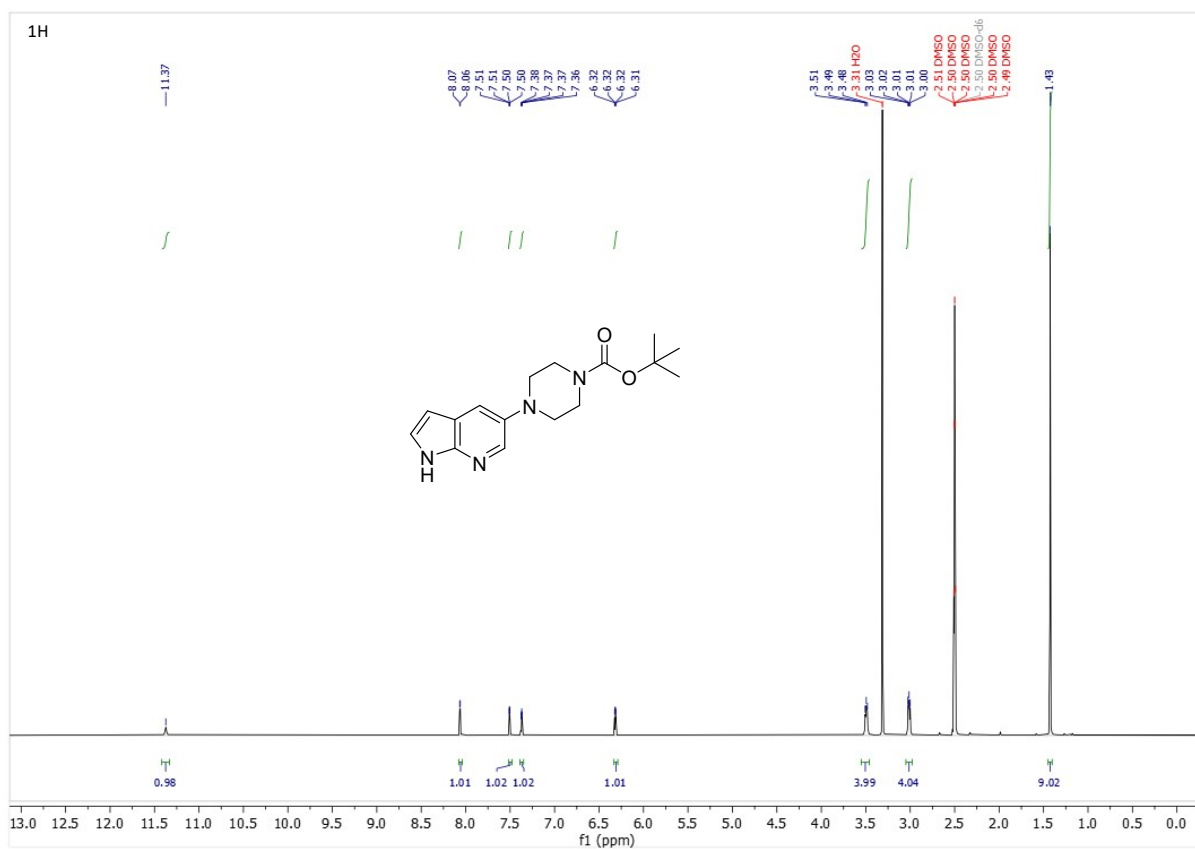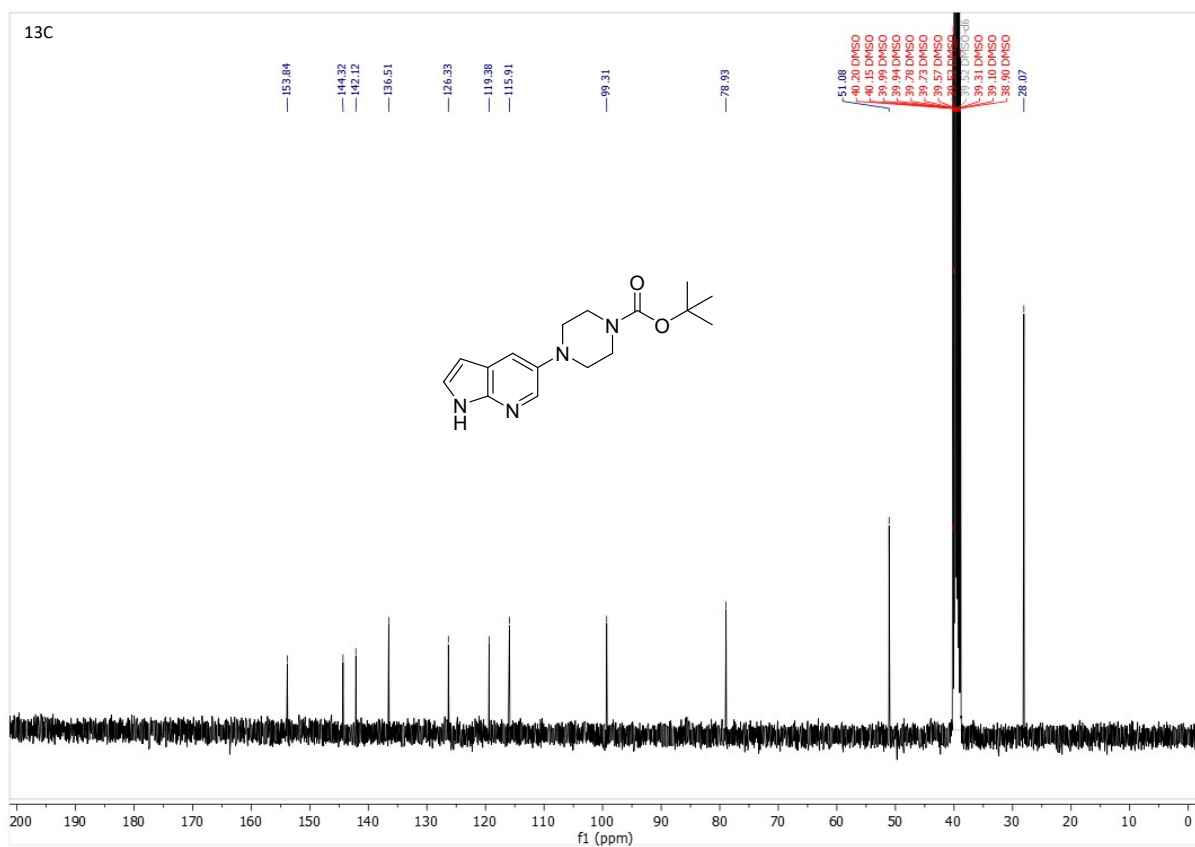

### 5-methoxy-N-{1H-pyrrolo[2,3-b]pyridin-5-yl}pyridin-2-amine (10)

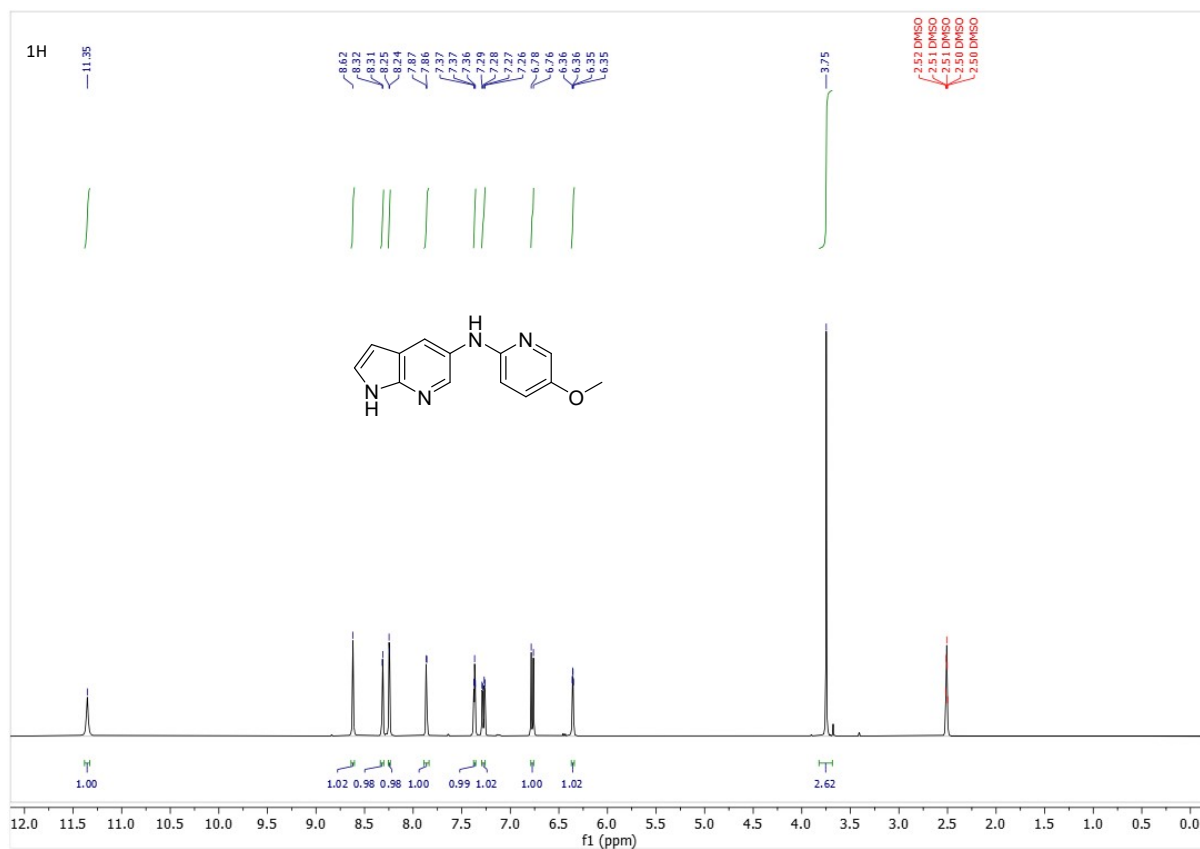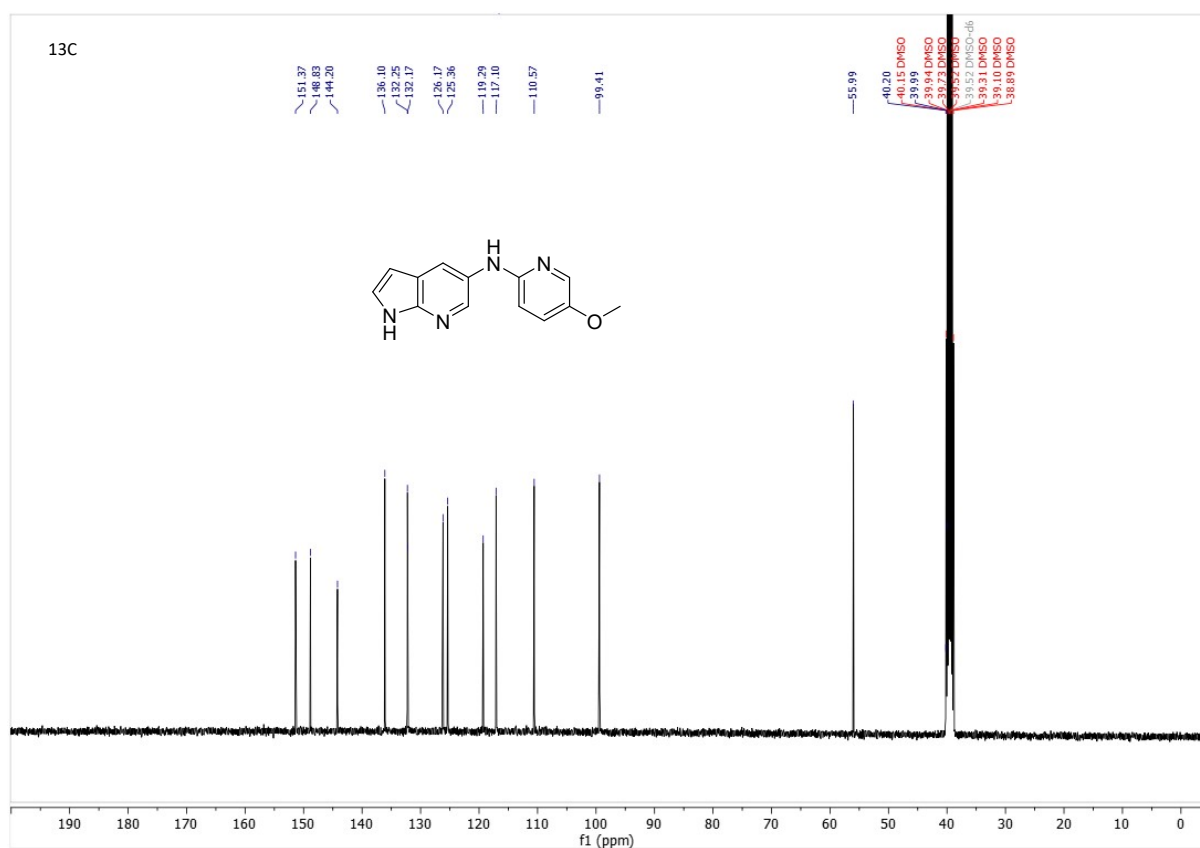



# N-(4-methoxyphenyl)pyridine-3-carboxamide (11)<sup>4</sup>

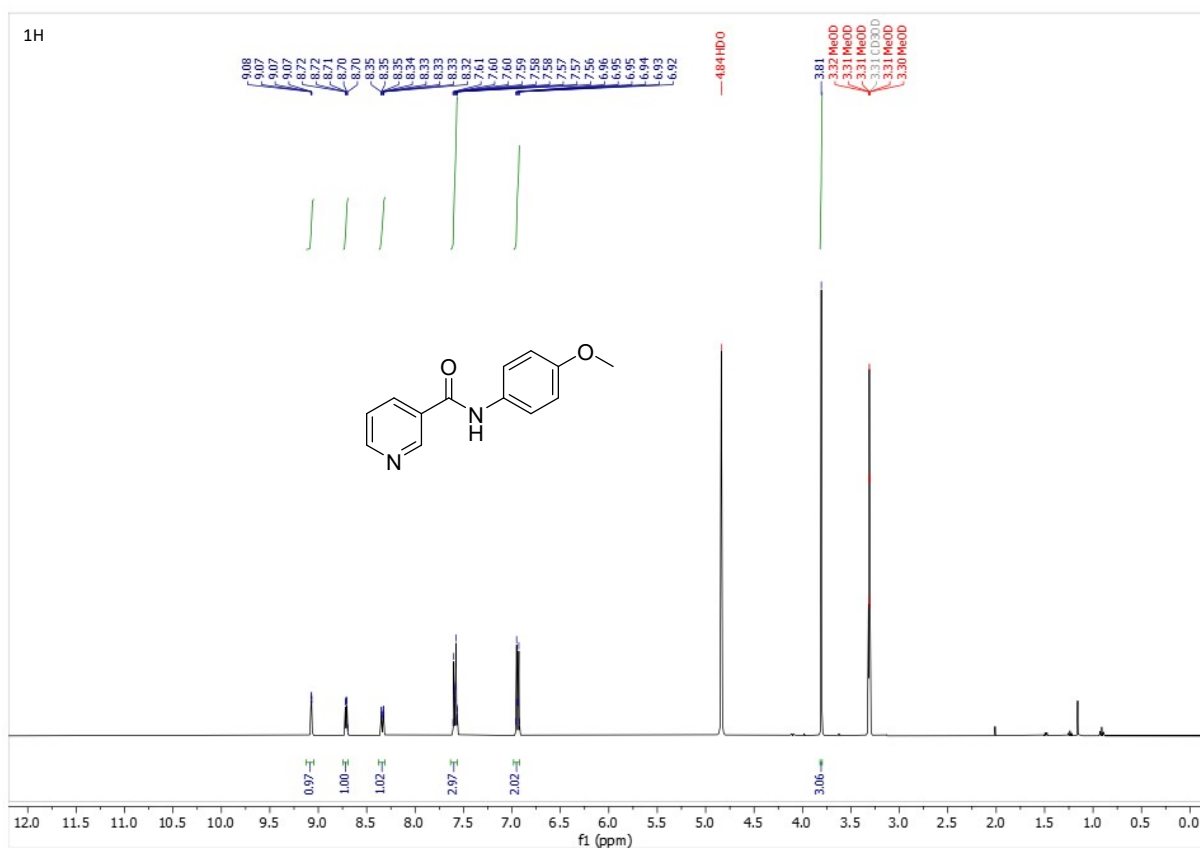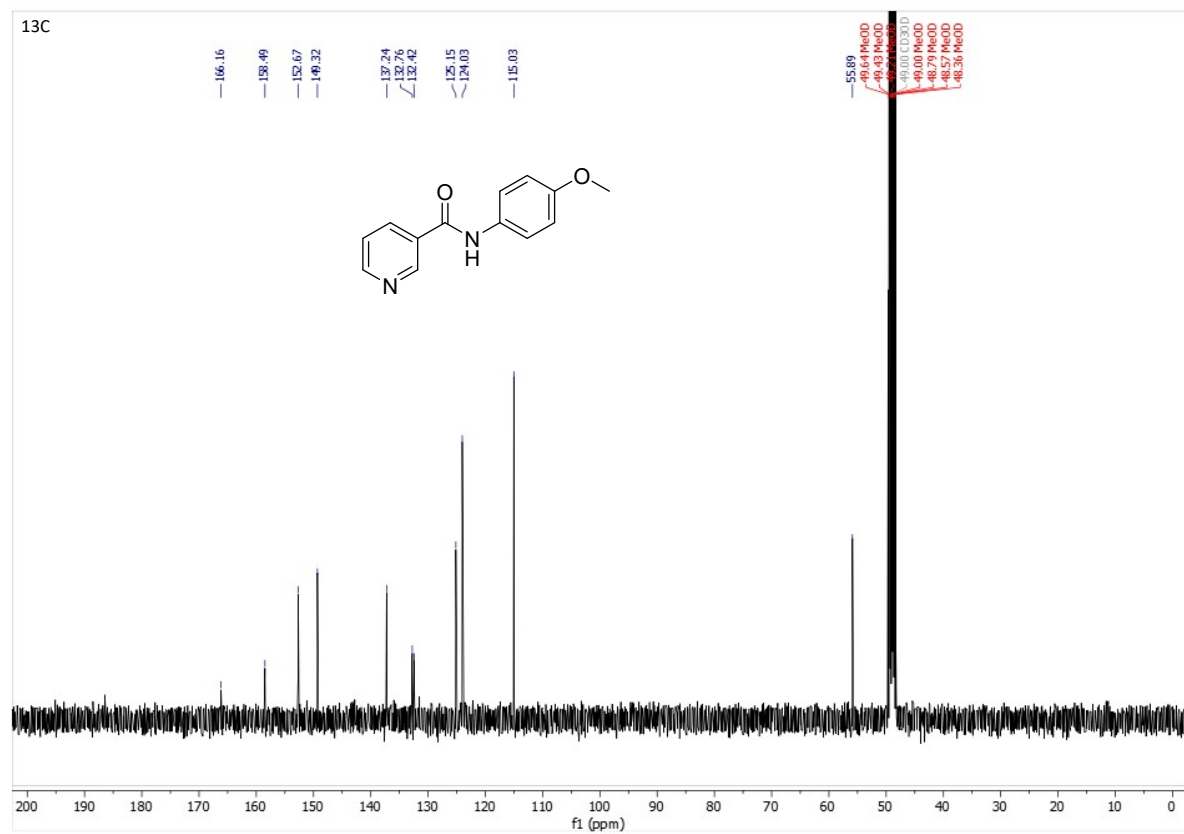

**tert-butyl 3-(quinolin-6-yloxy)azetidine-1-carboxylate (12)<sup>5</sup>**

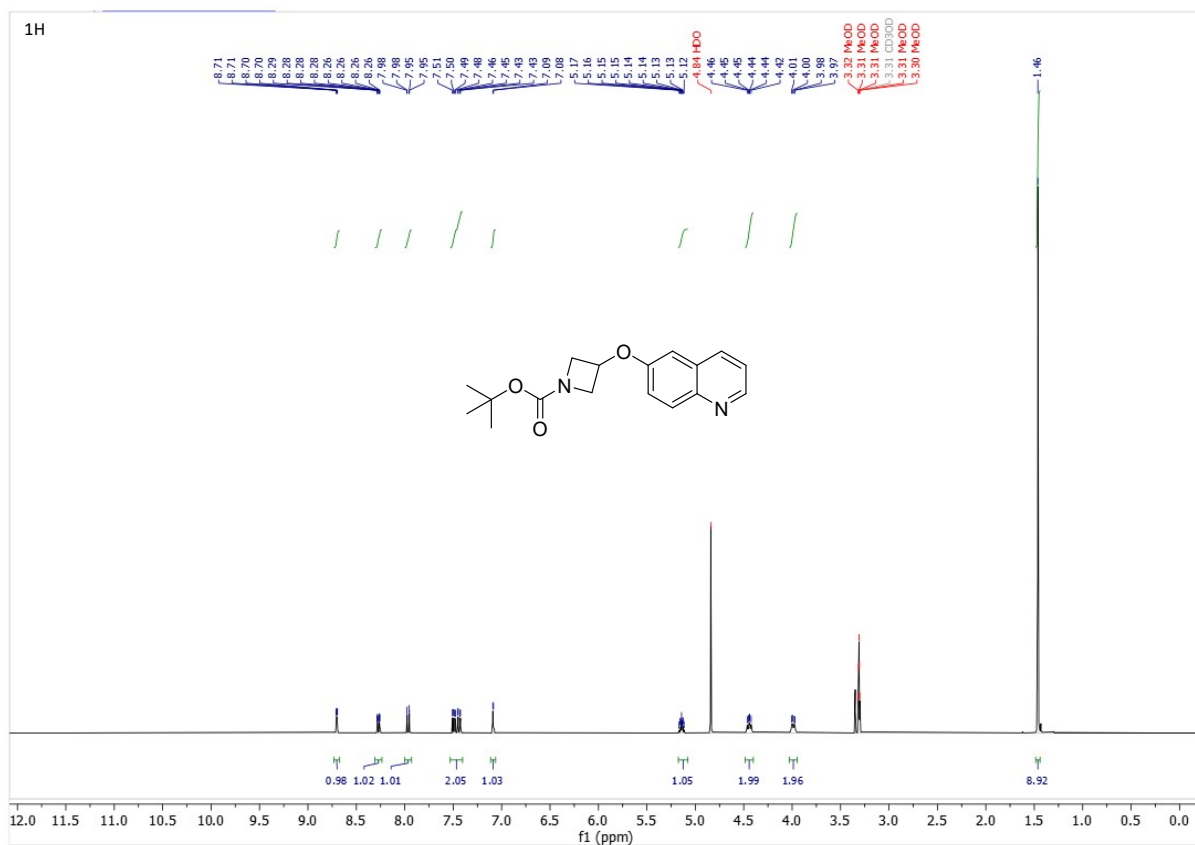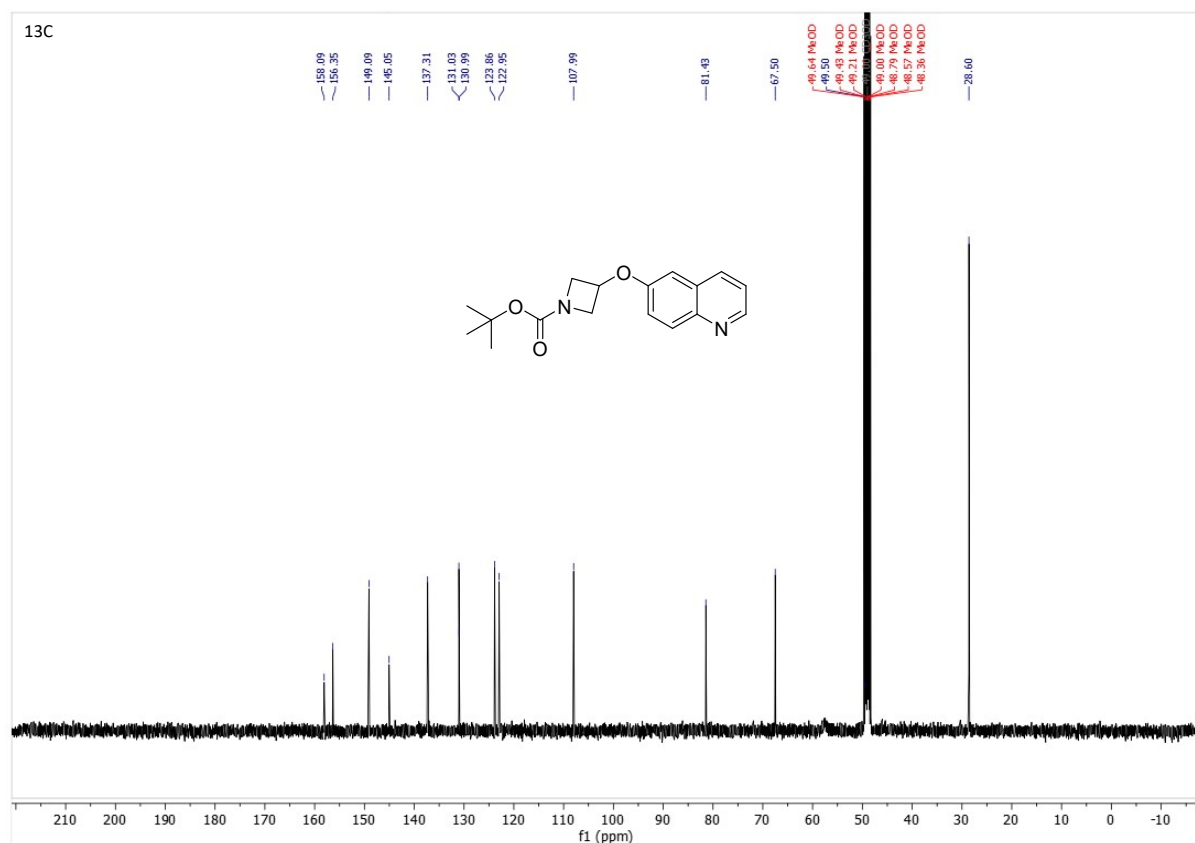

methyl 7-(benzyloxy)-1H-indazole-4-carboxylate

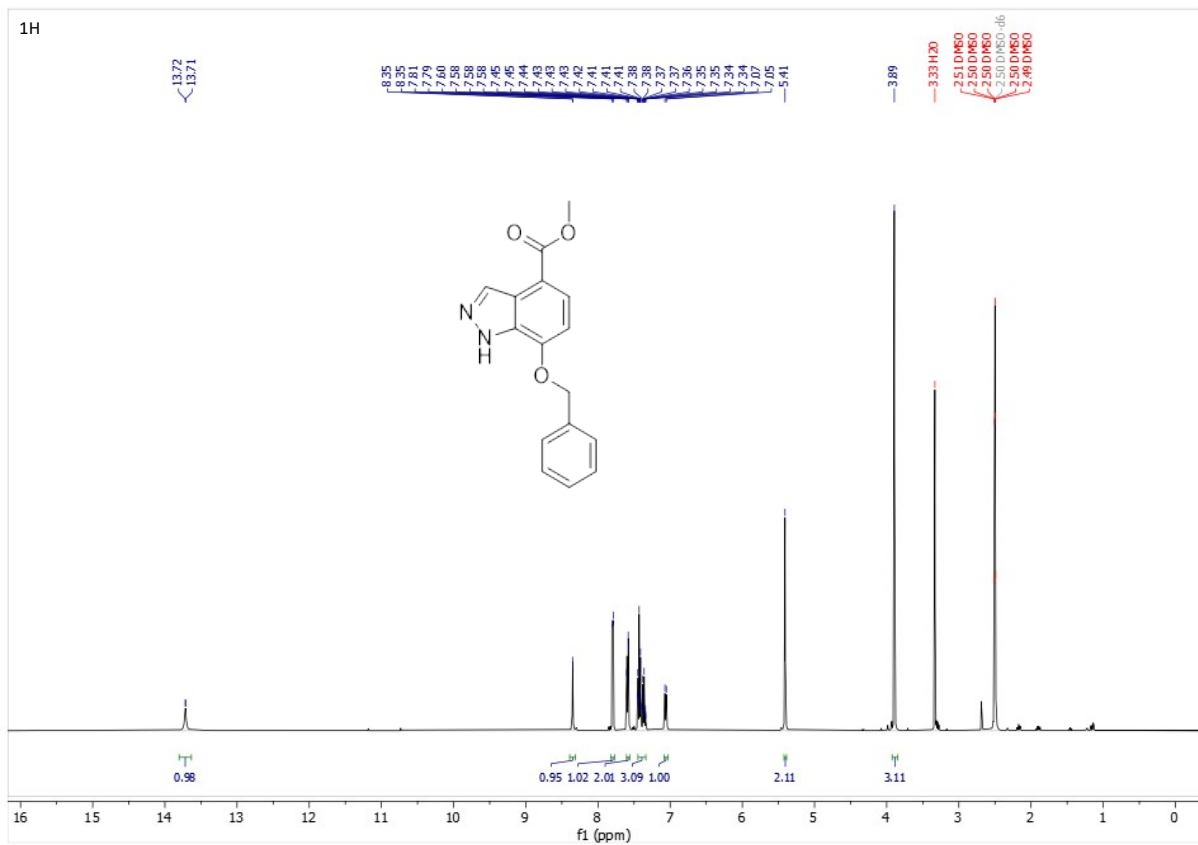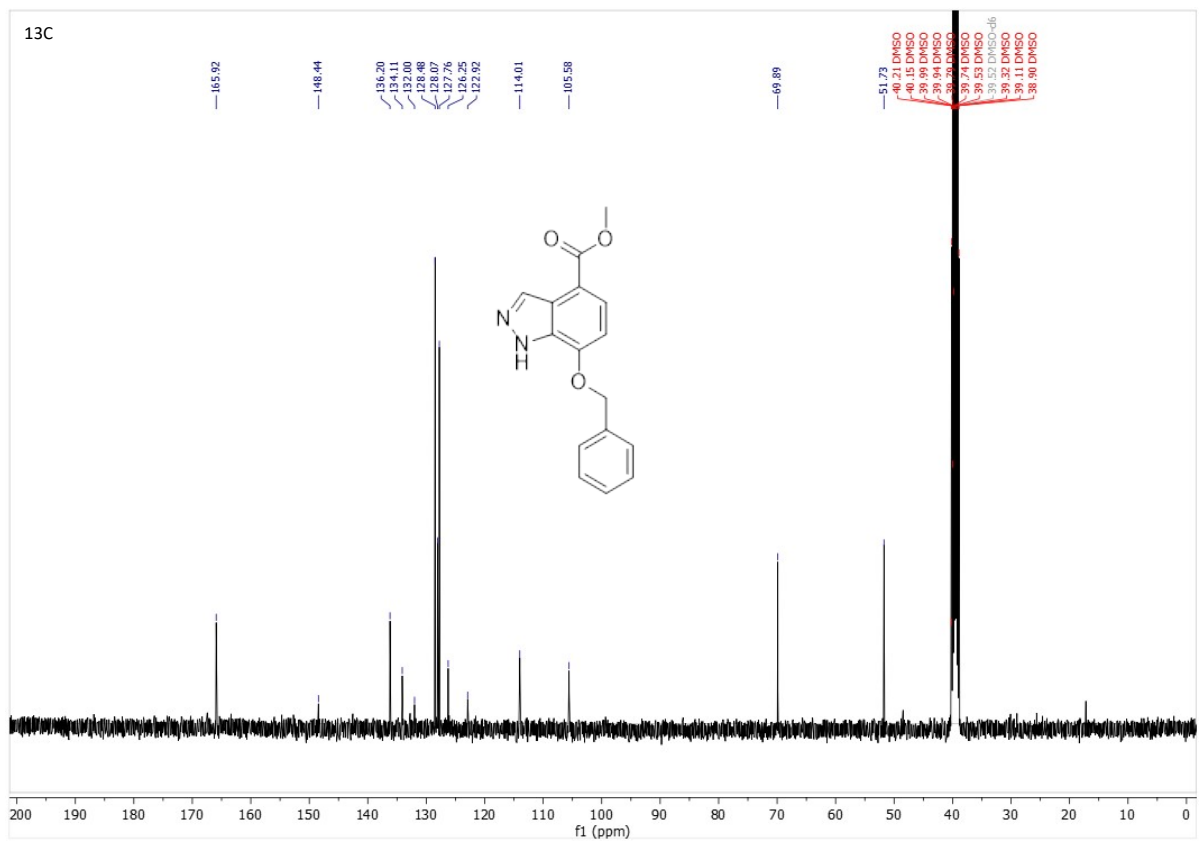

**Tabulated MISER data:**

Suzuki-Miyaura screening kit

| Cell ID | Desired Product (%)                         |        | Reactant (%)                                                               | Components |
|---------|---------------------------------------------|--------|----------------------------------------------------------------------------|------------|
|         | 5-(2-fluorophenyl-1H-pyrrolo[2,3-b]pyridine |        | 5-bromo-1H-pyrrolo[2,3-b]pyridine                                          |            |
|         | Max Resp:464370.2                           |        | Max Resp:67047.5                                                           |            |
|         | m/z:213                                     |        | m/z:197                                                                    |            |
| E11     | 100.00                                      | 9.84   | APhos-Pd-G3: 0.13 mg CsF: 3.04 mg t-AmOH: 80.00 uL H2O: 20.00 uL           |            |
| A8      | 91.10                                       | 23.10  | DTBPF-Pd-G3: 0.17 mg K2CO3: 2.76 mg t-AmOH: 80.00 uL H2O: 20.00 uL         |            |
| E5      | 78.95                                       | 9.23   | APhos-Pd-G3: 0.13 mg CsF: 3.04 mg dioxane: 80.00 uL H2O: 20.00 uL          |            |
| A11     | 76.17                                       | 5.08   | APhos-Pd-G3: 0.13 mg K2CO3: 2.76 mg t-AmOH: 80.00 uL H2O: 20.00 uL         |            |
| B9      | 68.14                                       | 11.65  | PCy3-Pd-G4: 0.13 mg K2CO3: 2.76 mg t-AmOH: 80.00 uL H2O: 20.00 uL          |            |
| C11     | 67.42                                       | 17.60  | APhos-Pd-G3: 0.13 mg K3PO4: 4.25 mg t-AmOH: 80.00 uL H2O: 20.00 uL         |            |
| D9      | 66.73                                       | 20.29  | PCy3-Pd-G4: 0.13 mg K3PO4: 4.25 mg t-AmOH: 80.00 uL H2O: 20.00 uL          |            |
| F9      | 62.82                                       | 15.12  | PCy3-Pd-G4: 0.13 mg CsF: 3.04 mg t-AmOH: 80.00 uL H2O: 20.00 uL            |            |
| C10     | 58.30                                       | 100.00 | XPhos-Pd-G3: 0.17 mg K3PO4: 4.25 mg t-AmOH: 80.00 uL H2O: 20.00 uL         |            |
| A3      | 54.70                                       | 8.36   | cataCXium A-Pd-G3: 0.15 mg K2CO3: 2.76 mg dioxane: 80.00 uL H2O: 20.00 uL  |            |
| D3      | 50.41                                       | 18.28  | PCy3-Pd-G4: 0.13 mg K3PO4: 4.25 mg dioxane: 80.00 uL H2O: 20.00 uL         |            |
| E3      | 48.89                                       | 50.28  | cataCXium A-Pd-G3: 0.15 mg CsF: 3.04 mg dioxane: 80.00 uL H2O: 20.00 uL    |            |
| C9      | 48.30                                       | 28.66  | cataCXium A-Pd-G3: 0.15 mg K3PO4: 4.25 mg t-AmOH: 80.00 uL H2O: 20.00 uL   |            |
| F3      | 47.67                                       | 12.69  | PCy3-Pd-G4: 0.13 mg CsF: 3.04 mg dioxane: 80.00 uL H2O: 20.00 uL           |            |
| D12     | 45.28                                       | 31.62  | IPr(h3-indenyl)PdCl: 0.14 mg K3PO4: 4.25 mg t-AmOH: 80.00 uL H2O: 20.00 uL |            |

|     |       |       |                                                                                                                                    |
|-----|-------|-------|------------------------------------------------------------------------------------------------------------------------------------|
| F11 | 44.81 | 28.59 | Pd(dppf)Cl <sub>2</sub> : 0.13 mg CsF: 3.04 mg t-AmOH:<br>80.00 uL H <sub>2</sub> O: 20.00 uL                                      |
| A9  | 44.49 | 0.00  | cataCXium A-Pd-G3: 0.15 mg K <sub>2</sub> CO <sub>3</sub> : 2.76<br>mg t-AmOH: 80.00 uL H <sub>2</sub> O: 20.00 uL                 |
| A5  | 44.10 | 27.51 | APhos-Pd-G3: 0.13 mg K <sub>2</sub> CO <sub>3</sub> : 2.76<br>mg dioxane: 80.00 uL H <sub>2</sub> O: 20.00 uL                      |
| G11 | 40.67 | 17.83 | APhos-Pd-G3: 0.13 mg NaOH: 0.80 mg t-<br>AmOH: 80.00 uL H <sub>2</sub> O: 20.00 uL                                                 |
| E12 | 40.04 | 26.33 | RuPhos-Pd-G4: 0.17 mg CsF: 3.04 mg t-<br>AmOH: 80.00 uL H <sub>2</sub> O: 20.00 uL                                                 |
| F12 | 39.78 | 30.50 | IPr(h <sup>3</sup> -indenyl)PdCl: 0.14 mg CsF: 3.04 mg t-<br>AmOH: 80.00 uL H <sub>2</sub> O: 20.00 uL                             |
| A2  | 39.06 | 7.54  | DTBPF-Pd-G3: 0.17 mg K <sub>2</sub> CO <sub>3</sub> : 2.76<br>mg dioxane: 80.00 uL H <sub>2</sub> O: 20.00 uL                      |
| F10 | 36.25 | 18.51 | DavePhos-Pd-G3: 0.15 mg CsF: 3.04 mg t-<br>AmOH: 80.00 uL H <sub>2</sub> O: 20.00 uL                                               |
| H8  | 30.93 | 35.02 | P(t-Bu) <sub>3</sub> -Pd-G4: 0.11 mg NaOH: 0.80 mg t-<br>AmOH: 80.00 uL H <sub>2</sub> O: 20.00 uL                                 |
| H6  | 30.28 | 27.37 | IPr(h <sup>3</sup> -indenyl)PdCl: 0.14 mg NaOH: 0.80<br>mg dioxane: 80.00 uL H <sub>2</sub> O: 20.00 uL                            |
| G8  | 29.69 | 38.02 | DTBPF-Pd-G3: 0.17 mg NaOH: 0.80 mg t-<br>AmOH: 80.00 uL H <sub>2</sub> O: 20.00 uL                                                 |
| C3  | 27.73 | 61.67 | cataCXium A-Pd-G3: 0.15 mg K <sub>3</sub> PO <sub>4</sub> : 4.25<br>mg dioxane: 80.00 uL H <sub>2</sub> O: 20.00 uL                |
| D6  | 26.70 | 0.00  | IPr(h <sup>3</sup> -indenyl)PdCl: 0.14 mg K <sub>3</sub> PO <sub>4</sub> : 4.25<br>mg dioxane: 80.00 uL H <sub>2</sub> O: 20.00 uL |
| E10 | 26.57 | 31.48 | XPhos-Pd-G3: 0.17 mg CsF: 3.04 mg t-AmOH:<br>80.00 uL H <sub>2</sub> O: 20.00 uL                                                   |
| F7  | 26.35 | 32.54 | BrettPhos-Pd-G3: 0.18 mg CsF: 3.04 mg t-<br>AmOH: 80.00 uL H <sub>2</sub> O: 20.00 uL                                              |
| B3  | 25.86 | 9.86  | PCy <sub>3</sub> -Pd-G4: 0.13 mg K <sub>2</sub> CO <sub>3</sub> : 2.76<br>mg dioxane: 80.00 uL H <sub>2</sub> O: 20.00 uL          |
| F6  | 24.74 | 9.48  | IPr(h <sup>3</sup> -indenyl)PdCl: 0.14 mg CsF: 3.04<br>mg dioxane: 80.00 uL H <sub>2</sub> O: 20.00 uL                             |
| C5  | 24.56 | 8.35  | APhos-Pd-G3: 0.13 mg K <sub>3</sub> PO <sub>4</sub> : 4.25<br>mg dioxane: 80.00 uL H <sub>2</sub> O: 20.00 uL                      |
| C2  | 24.15 | 58.05 | DTBPF-Pd-G3: 0.17 mg K <sub>3</sub> PO <sub>4</sub> : 4.25<br>mg dioxane: 80.00 uL H <sub>2</sub> O: 20.00 uL                      |
| H11 | 22.58 | 53.75 | Pd(dppf)Cl <sub>2</sub> : 0.13 mg NaOH: 0.80 mg t-<br>AmOH: 80.00 uL H <sub>2</sub> O: 20.00 uL                                    |
| E2  | 22.47 | 0.00  | DTBPF-Pd-G3: 0.17 mg CsF: 3.04 mg dioxane:                                                                                         |

|     |       |       |                                                                             |
|-----|-------|-------|-----------------------------------------------------------------------------|
|     |       |       | 80.00 uL H2O: 20.00 uL                                                      |
| E9  | 22.44 | 0.00  | cataCXium A-Pd-G3: 0.15 mg CsF: 3.04 mg t-AmOH: 80.00 uL H2O: 20.00 uL      |
| H1  | 21.08 | 50.65 | BrettPhos-Pd-G3: 0.18 mg NaOH: 0.80 mg dioxane: 80.00 uL H2O: 20.00 uL      |
| B11 | 19.90 | 44.60 | Pd(dppf)Cl2: 0.13 mg K2CO3: 2.76 mg t-AmOH: 80.00 uL H2O: 20.00 uL          |
| B7  | 19.20 | 53.62 | BrettPhos-Pd-G3: 0.18 mg K2CO3: 2.76 mg t-AmOH: 80.00 uL H2O: 20.00 uL      |
| H12 | 19.10 | 48.89 | IPr(h3-indenyl)PdCl: 0.14 mg NaOH: 0.80 mg t-AmOH: 80.00 uL H2O: 20.00 uL   |
| A12 | 17.29 | 52.22 | RuPhos-Pd-G4: 0.17 mg K2CO3: 2.76 mg t-AmOH: 80.00 uL H2O: 20.00 uL         |
| E8  | 16.97 | 0.00  | DTBPF-Pd-G3: 0.17 mg CsF: 3.04 mg t-AmOH: 80.00 uL H2O: 20.00 uL            |
| B2  | 16.40 | 38.03 | P(t-Bu)3-Pd-G4: 0.11 mg K2CO3: 2.76 mg dioxane: 80.00 uL H2O: 20.00 uL      |
| D11 | 15.83 | 33.94 | Pd(dppf)Cl2: 0.13 mg K3PO4: 4.25 mg t-AmOH: 80.00 uL H2O: 20.00 uL          |
| F1  | 15.70 | 55.43 | BrettPhos-Pd-G3: 0.18 mg CsF: 3.04 mg dioxane: 80.00 uL H2O: 20.00 uL       |
| D8  | 15.37 | 7.19  | P(t-Bu)3-Pd-G4: 0.11 mg K3PO4: 4.25 mg t-AmOH: 80.00 uL H2O: 20.00 uL       |
| B10 | 15.26 | 56.55 | DavePhos-Pd-G3: 0.15 mg K2CO3: 2.76 mg t-AmOH: 80.00 uL H2O: 20.00 uL       |
| B6  | 13.91 | 49.46 | IPr(h3-indenyl)PdCl: 0.14 mg K2CO3: 2.76 mg dioxane: 80.00 uL H2O: 20.00 uL |
| G2  | 13.13 | 14.96 | DTBPF-Pd-G3: 0.17 mg NaOH: 0.80 mg dioxane: 80.00 uL H2O: 20.00 uL          |
| E7  | 13.12 | 12.13 | SPhos-Pd-G3: 0.16 mg CsF: 3.04 mg t-AmOH: 80.00 uL H2O: 20.00 uL            |
| H2  | 12.99 | 33.61 | P(t-Bu)3-Pd-G4: 0.11 mg NaOH: 0.80 mg dioxane: 80.00 uL H2O: 20.00 uL       |
| F5  | 11.37 | 46.61 | Pd(dppf)Cl2: 0.13 mg CsF: 3.04 mg dioxane: 80.00 uL H2O: 20.00 uL           |
| G5  | 11.32 | 11.57 | APhos-Pd-G3: 0.13 mg NaOH: 0.80 mg dioxane: 80.00 uL H2O: 20.00 uL          |
| C8  | 10.74 | 0.00  | DTBPF-Pd-G3: 0.17 mg K3PO4: 4.25 mg t-AmOH: 80.00 uL H2O: 20.00 uL          |
| C6  | 10.52 | 33.38 | RuPhos-Pd-G4: 0.17 mg K3PO4: 4.25 mg dioxane: 80.00 uL H2O: 20.00 uL        |

|     |       |       |                                                                                                                            |
|-----|-------|-------|----------------------------------------------------------------------------------------------------------------------------|
| A6  | 10.05 | 58.15 | RuPhos-Pd-G4: 0.17 mg K <sub>2</sub> CO <sub>3</sub> : 2.76 mg dioxane: 80.00 uL H <sub>2</sub> O: 20.00 uL                |
| F8  | 9.13  | 5.27  | P(t-Bu) <sub>3</sub> -Pd-G4: 0.11 mg CsF: 3.04 mg t-AmOH: 80.00 uL H <sub>2</sub> O: 20.00 uL                              |
| E6  | 9.13  | 0.00  | RuPhos-Pd-G4: 0.17 mg CsF: 3.04 mg dioxane: 80.00 uL H <sub>2</sub> O: 20.00 uL                                            |
| C12 | 9.04  | 32.99 | RuPhos-Pd-G4: 0.17 mg K <sub>3</sub> PO <sub>4</sub> : 4.25 mg t-AmOH: 80.00 uL H <sub>2</sub> O: 20.00 uL                 |
| B8  | 8.84  | 5.77  | P(t-Bu) <sub>3</sub> -Pd-G4: 0.11 mg K <sub>2</sub> CO <sub>3</sub> : 2.76 mg t-AmOH: 80.00 uL H <sub>2</sub> O: 20.00 uL  |
| G12 | 8.47  | 35.19 | RuPhos-Pd-G4: 0.17 mg NaOH: 0.80 mg t-AmOH: 80.00 uL H <sub>2</sub> O: 20.00 uL                                            |
| D1  | 8.09  | 54.89 | BrettPhos-Pd-G3: 0.18 mg K <sub>3</sub> PO <sub>4</sub> : 4.25 mg dioxane: 80.00 uL H <sub>2</sub> O: 20.00 uL             |
| D5  | 8.02  | 33.17 | Pd(dppf)Cl <sub>2</sub> : 0.13 mg K <sub>3</sub> PO <sub>4</sub> : 4.25 mg dioxane: 80.00 uL H <sub>2</sub> O: 20.00 uL    |
| D4  | 7.94  | 38.07 | DavePhos-Pd-G3: 0.15 mg K <sub>3</sub> PO <sub>4</sub> : 4.25 mg dioxane: 80.00 uL H <sub>2</sub> O: 20.00 uL              |
| F2  | 7.80  | 31.24 | P(t-Bu) <sub>3</sub> -Pd-G4: 0.11 mg CsF: 3.04 mg dioxane: 80.00 uL H <sub>2</sub> O: 20.00 uL                             |
| H7  | 7.74  | 36.12 | BrettPhos-Pd-G3: 0.18 mg NaOH: 0.80 mg t-AmOH: 80.00 uL H <sub>2</sub> O: 20.00 uL                                         |
| D2  | 7.72  | 22.20 | P(t-Bu) <sub>3</sub> -Pd-G4: 0.11 mg K <sub>3</sub> PO <sub>4</sub> : 4.25 mg dioxane: 80.00 uL H <sub>2</sub> O: 20.00 uL |
| E4  | 7.64  | 0.00  | XPhos-Pd-G3: 0.17 mg CsF: 3.04 mg dioxane: 80.00 uL H <sub>2</sub> O: 20.00 uL                                             |
| H5  | 7.08  | 52.56 | Pd(dppf)Cl <sub>2</sub> : 0.13 mg NaOH: 0.80 mg dioxane: 80.00 uL H <sub>2</sub> O: 20.00 uL                               |
| G3  | 6.91  | 44.73 | cataCXium A-Pd-G3: 0.15 mg NaOH: 0.80 mg dioxane: 80.00 uL H <sub>2</sub> O: 20.00 uL                                      |
| B1  | 6.56  | 37.84 | BrettPhos-Pd-G3: 0.18 mg K <sub>2</sub> CO <sub>3</sub> : 2.76 mg dioxane: 80.00 uL H <sub>2</sub> O: 20.00 uL             |
| A4  | 6.32  | 54.62 | XPhos-Pd-G3: 0.17 mg K <sub>2</sub> CO <sub>3</sub> : 2.76 mg dioxane: 80.00 uL H <sub>2</sub> O: 20.00 uL                 |
| D10 | 6.03  | 19.06 | DavePhos-Pd-G3: 0.15 mg K <sub>3</sub> PO <sub>4</sub> : 4.25 mg t-AmOH: 80.00 uL H <sub>2</sub> O: 20.00 uL               |
| A7  | 5.98  | 54.77 | SPhos-Pd-G3: 0.16 mg K <sub>2</sub> CO <sub>3</sub> : 2.76 mg t-AmOH: 80.00 uL H <sub>2</sub> O: 20.00 uL                  |
| H3  | 5.85  | 8.93  | PCy <sub>3</sub> -Pd-G4: 0.13 mg NaOH: 0.80 mg dioxane: 80.00 uL H <sub>2</sub> O: 20.00 uL                                |
| G9  | 5.69  | 13.52 | cataCXium A-Pd-G3: 0.15 mg NaOH: 0.80                                                                                      |

|     |      |       |                                                                            |
|-----|------|-------|----------------------------------------------------------------------------|
|     |      |       | mg t-AmOH: 80.00 uL H2O: 20.00 uL                                          |
| B5  | 5.59 | 13.34 | Pd(dppf)Cl2: 0.13 mg K2CO3: 2.76 mg dioxane: 80.00 uL H2O: 20.00 uL        |
| G10 | 5.54 | 40.36 | XPhos-Pd-G3: 0.17 mg NaOH: 0.80 mg t-AmOH: 80.00 uL H2O: 20.00 uL          |
| A10 | 5.51 | 5.89  | XPhos-Pd-G3: 0.17 mg K2CO3: 2.76 mg t-AmOH: 80.00 uL H2O: 20.00 uL         |
| F4  | 5.21 | 10.19 | DavePhos-Pd-G3: 0.15 mg CsF: 3.04 mg dioxane: 80.00 uL H2O: 20.00 uL       |
| G6  | 5.14 | 35.56 | RuPhos-Pd-G4: 0.17 mg NaOH: 0.80 mg dioxane: 80.00 uL H2O: 20.00 uL        |
| C1  | 4.69 | 62.39 | SPhos-Pd-G3: 0.16 mg K3PO4: 4.25 mg dioxane: 80.00 uL H2O: 20.00 uL        |
| H10 | 3.88 | 10.10 | DavePhos-Pd-G3: 0.15 mg NaOH: 0.80 mg t-AmOH: 80.00 uL H2O: 20.00 uL       |
| D7  | 3.40 | 5.18  | BrettPhos-Pd-G3: 0.18 mg K3PO4: 4.25 mg t-AmOH: 80.00 uL H2O: 20.00 uL     |
| G7  | 3.17 | 32.14 | SPhos-Pd-G3: 0.16 mg NaOH: 0.80 mg t-AmOH: 80.00 uL H2O: 20.00 uL          |
| C7  | 2.89 | 7.80  | SPhos-Pd-G3: 0.16 mg K3PO4: 4.25 mg t-AmOH: 80.00 uL H2O: 20.00 uL         |
| G1  | 2.86 | 57.22 | SPhos-Pd-G3: 0.16 mg NaOH: 0.80 mg dioxane: 80.00 uL H2O: 20.00 uL         |
| E1  | 2.67 | 0.00  | SPhos-Pd-G3: 0.16 mg CsF: 3.04 mg dioxane: 80.00 uL H2O: 20.00 uL          |
| H9  | 2.48 | 14.51 | PCy3-Pd-G4: 0.13 mg NaOH: 0.80 mg t-AmOH: 80.00 uL H2O: 20.00 uL           |
| A1  | 1.81 | 65.55 | SPhos-Pd-G3: 0.16 mg K2CO3: 2.76 mg dioxane: 80.00 uL H2O: 20.00 uL        |
| B4  | 1.76 | 6.03  | DavePhos-Pd-G3: 0.15 mg K2CO3: 2.76 mg dioxane: 80.00 uL H2O: 20.00 uL     |
| B12 | 1.60 | 54.84 | IPr(h3-indenyl)PdCl: 0.14 mg K2CO3: 2.76 mg t-AmOH: 80.00 uL H2O: 20.00 uL |
| H4  | 1.56 | 9.77  | DavePhos-Pd-G3: 0.15 mg NaOH: 0.80 mg dioxane: 80.00 uL H2O: 20.00 uL      |
| G4  | 1.34 | 8.34  | XPhos-Pd-G3: 0.17 mg NaOH: 0.80 mg dioxane: 80.00 uL H2O: 20.00 uL         |
| C4  | 0.77 | 6.03  | XPhos-Pd-G3: 0.17 mg K3PO4: 4.25 mg dioxane: 80.00 uL H2O: 20.00 uL        |



Buchwald-Hartwig primary amine screening kit (primary amine)

| Cell ID | Desired Product (%)                                       | Reactant (%)                      | Components                                                                    |
|---------|-----------------------------------------------------------|-----------------------------------|-------------------------------------------------------------------------------|
|         | N-[(pyridin-4-yl)methyl]-1H-pyrrolo[2,3-b]pyridin-5-amine | 5-bromo-1H-pyrrolo[2,3-b]pyridine |                                                                               |
|         | Max Resp:393248.4                                         | Max Resp:46931.4                  |                                                                               |
|         | m/z:225                                                   | m/z:197                           |                                                                               |
| B2      | 100.00                                                    | 20.87                             | AdBrettPhos Pd G3: 0.20 mg t-BuOK: 2.24 mg dioxane: 100.00 uL                 |
| C7      | 77.94                                                     | 0.00                              | DMPDAB Pd MAH: 0.09 mg Ad-BippyPhos: 0.13 mg KHMDS: 3.99 mg t-AmOH: 100.00 uL |
| A10     | 68.87                                                     | 0.00                              | tBuBrettPhos Pd G3: 0.17 mg t-BuOK: 2.24 mg t-AmOH: 100.00 uL                 |
| D2      | 64.31                                                     | 26.04                             | AdBrettPhos Pd G3: 0.20 mg KHMDS: 3.99 mg dioxane: 100.00 uL                  |
| C10     | 63.90                                                     | 0.00                              | tBuBrettPhos Pd G3: 0.17 mg KHMDS: 3.99 mg t-AmOH: 100.00 uL                  |
| C4      | 58.03                                                     | 26.51                             | tBuBrettPhos Pd G3: 0.17 mg KHMDS: 3.99 mg dioxane: 100.00 uL                 |
| B6      | 56.23                                                     | 27.63                             | Gphos Pd G3: 0.18 mg t-BuOK: 2.24 mg dioxane: 100.00 uL                       |
| B1      | 47.00                                                     | 52.02                             | Me3(OMe)tBuXPhos Pd G3: 0.16 mg t-BuOK: 2.24 mg dioxane: 100.00 uL            |
| B7      | 42.03                                                     | 16.42                             | Me3(OMe)tBuXPhos Pd G3: 0.16 mg t-BuOK: 2.24 mg t-AmOH: 100.00 uL             |
| C12     | 34.14                                                     | 16.89                             | [Pd(bippyPhos)(allyl)]OTf: 0.16 mg KHMDS: 3.99 mg t-AmOH: 100.00 uL           |
| B8      | 22.66                                                     | 0.00                              | AdBrettPhos Pd G3: 0.20 mg t-BuOK: 2.24 mg t-AmOH: 100.00 uL                  |
| D12     | 22.40                                                     | 19.13                             | Gphos Pd G3: 0.18 mg KHMDS: 3.99 mg t-AmOH: 100.00 uL                         |
| B12     | 16.56                                                     | 11.76                             | Gphos Pd G3: 0.18 mg t-BuOK: 2.24 mg t-AmOH: 100.00 uL                        |
| A12     | 14.94                                                     | 15.05                             | [Pd(bippyPhos)(allyl)]OTf: 0.16 mg t-BuOK: 2.24 mg t-AmOH: 100.00 uL          |
| H8      | 11.18                                                     | 12.15                             | P2-Et: 6.66 uL AdBrettPhos Pd G3: 0.20 mg t-AmOH: 100.00 uL                   |

|     |       |       |                                                                                                           |
|-----|-------|-------|-----------------------------------------------------------------------------------------------------------|
| A6  | 10.53 | 34.24 | [Pd(bippyPhos)(allyl)]OTf: 0.16 mg t-BuOK: 2.24 mg dioxane: 100.00 uL                                     |
| F2  | 10.08 | 35.30 | Cs <sub>2</sub> CO <sub>3</sub> : 6.52 mg AdBrettPhos Pd G3: 0.20 mg dioxane: 100.00 uL                   |
| E7  | 9.26  | 29.65 | DMPDAB Pd MAH: 0.09 mg Ad-BippyPhos: 0.13 mg Cs <sub>2</sub> CO <sub>3</sub> : 6.52 mg t-AmOH: 100.00 uL  |
| C1  | 8.69  | 46.96 | DMPDAB Pd MAH: 0.09 mg Ad-BippyPhos: 0.13 mg KHMDS: 3.99 mg dioxane: 100.00 uL                            |
| E10 | 6.89  | 21.10 | Cs <sub>2</sub> CO <sub>3</sub> : 6.52 mg tBuBrettPhos Pd G3: 0.17 mg t-AmOH: 100.00 uL                   |
| B9  | 6.38  | 39.56 | (tBu)PhCPhos Pd G4: 0.16 mg t-BuOK: 2.24 mg t-AmOH: 100.00 uL                                             |
| A7  | 5.35  | 0.00  | DMPDAB Pd MAH: 0.09 mg Ad-BippyPhos: 0.13 mg T-BuOK: 2.24 mg t-AmOH: 100.00 uL                            |
| F7  | 5.13  | 18.45 | Cs <sub>2</sub> CO <sub>3</sub> : 6.52 mg Me <sub>3</sub> (OMe)tBuXPhos Pd G3: 0.16 mg t-AmOH: 100.00 uL  |
| H2  | 4.08  | 0.00  | P2-Et: 6.66 uL AdBrettPhos Pd G3: 0.20 mg dioxane: 100.00 uL                                              |
| G10 | 3.70  | 4.34  | P2-Et: 6.66 uL tBuBrettPhos Pd G3: 0.17 mg t-AmOH: 100.00 uL                                              |
| A4  | 3.63  | 39.34 | tBuBrettPhos Pd G3: 0.17 mg t-BuOK: 2.24 mg dioxane: 100.00 uL                                            |
| A11 | 2.54  | 49.06 | BrettPhos Pd G3: 0.18 mg t-BuOK: 2.24 mg t-AmOH: 100.00 uL                                                |
| C11 | 2.51  | 32.09 | BrettPhos Pd G3: 0.18 mg KHMDS: 3.99 mg t-AmOH: 100.00 uL                                                 |
| G1  | 2.46  | 34.70 | P2-Et: 6.66 uL DMPDAB Pd MAH: 0.09 mg Ad-BippyPhos: 0.13 mg dioxane: 100.00 uL                            |
| B4  | 2.40  | 54.00 | DMPDAB Pd MAH: 0.09 mg PhCPhos: 0.08 mg T-BuOK: 2.24 mg dioxane: 100.00 uL                                |
| H1  | 2.10  | 11.09 | P2-Et: 6.66 uL Me <sub>3</sub> (OMe)tBuXPhos Pd G3: 0.16 mg dioxane: 100.00 uL                            |
| F1  | 1.58  | 36.01 | Cs <sub>2</sub> CO <sub>3</sub> : 6.52 mg Me <sub>3</sub> (OMe)tBuXPhos Pd G3: 0.16 mg dioxane: 100.00 uL |
| F8  | 1.42  | 41.61 | Cs <sub>2</sub> CO <sub>3</sub> : 6.52 mg AdBrettPhos Pd G3: 0.20 mg t-AmOH: 100.00 uL                    |
| C2  | 1.30  | 50.36 | MorDalPhos Pd G4: 0.17 mg KHMDS: 3.99                                                                     |

|     |      |       |                                                                               |
|-----|------|-------|-------------------------------------------------------------------------------|
|     |      |       | mg dioxane: 100.00 uL                                                         |
| H6  | 1.27 | 11.67 | P2-Et: 6.66 uL Gphos Pd G3: 0.18 mg dioxane: 100.00 uL                        |
| D6  | 1.04 | 55.97 | Gphos Pd G3: 0.18 mg KHMDS: 3.99 mg dioxane: 100.00 uL                        |
| C6  | 1.04 | 46.33 | [Pd(bippyPhos)(allyl)]OTf: 0.16 mg KHMDS: 3.99 mg dioxane: 100.00 uL          |
| D9  | 1.02 | 36.14 | (tBu)PhCPhos Pd G4: 0.16 mg KHMDS: 3.99 mg t-AmOH: 100.00 uL                  |
| G4  | 0.72 | 6.91  | P2-Et: 6.66 uL tBuBrettPhos Pd G3: 0.17 mg dioxane: 100.00 uL                 |
| B5  | 0.59 | 45.62 | Pd PEPPSI lpr: 0.14 mg t-BuOK: 2.24 mg dioxane: 100.00 uL                     |
| A5  | 0.57 | 26.80 | BrettPhos Pd G3: 0.18 mg t-BuOK: 2.24 mg dioxane: 100.00 uL                   |
| F6  | 0.56 | 40.12 | Cs2CO3: 6.52 mg Gphos Pd G3: 0.18 mg dioxane: 100.00 uL                       |
| E12 | 0.55 | 24.71 | Cs2CO3: 6.52 mg [Pd(bippyPhos)(allyl)]OTf: 0.16 mg t-AmOH: 100.00 uL          |
| A3  | 0.50 | 41.66 | JosiPhos Pd G3: 0.19 mg t-BuOK: 2.24 mg dioxane: 100.00 uL                    |
| D1  | 0.48 | 5.38  | Me3(OMe)tBuXPhos Pd G3: 0.16 mg KHMDS: 3.99 mg dioxane: 100.00 uL             |
| D3  | 0.47 | 50.44 | (tBu)PhCPhos Pd G4: 0.16 mg KHMDS: 3.99 mg dioxane: 100.00 uL                 |
| C5  | 0.46 | 37.28 | BrettPhos Pd G3: 0.18 mg KHMDS: 3.99 mg dioxane: 100.00 uL                    |
| D8  | 0.42 | 49.32 | AdBrettPhos Pd G3: 0.20 mg KHMDS: 3.99 mg t-AmOH: 100.00 uL                   |
| B10 | 0.37 | 29.76 | DMPDAB Pd MAH: 0.09 mg PhCPhos: 0.08 mg t-BuOK: 2.24 mg t-AmOH: 100.00 uL     |
| D4  | 0.37 | 35.01 | DMPDAB Pd MAH: 0.09 mg PhCPhos: 0.08 mg KHMDS: 3.99 mg dioxane: 100.00 uL     |
| C3  | 0.36 | 14.20 | JosiPhos Pd G3: 0.19 mg KHMDS: 3.99 mg dioxane: 100.00 uL                     |
| G7  | 0.35 | 7.40  | P2-Et: 6.66 uL DMPDAB Pd MAH: 0.09 mg Ad-BippyPhos: 0.13 mg t-AmOH: 100.00 uL |

|     |      |        |                                                                                 |
|-----|------|--------|---------------------------------------------------------------------------------|
| H7  | 0.34 | 3.63   | P2-Et: 6.66 uL Me3(OMe)tBuXPhos Pd G3: 0.16 mg t-AmOH: 100.00 uL                |
| E4  | 0.29 | 50.90  | tBuBrettPhos Pd G3: 0.17 mg Cs2CO3: 6.52 mg dioxane: 100.00 uL                  |
| A1  | 0.00 | 100.00 | DMPDAB Pd MAH: 0.09 mg Ad-BippyPhos: 0.13 mg t-BuOK: 2.24 mg dioxane: 100.00 uL |
| A2  | 0.00 | 14.78  | MorDalPhos Pd G4: 0.17 mg t-BuOK: 2.24 mg dioxane: 100.00 uL                    |
| A8  | 0.00 | 39.43  | MorDalPhos Pd G4: 0.17 mg t-BuOK: 2.24 mg t-AmOH: 100.00 uL                     |
| A9  | 0.00 | 34.07  | JosiPhos Pd G3: 0.19 mg t-BuOK: 2.24 mg t-AmOH: 100.00 uL                       |
| B3  | 0.00 | 0.00   | (tBu)PhCPhos Pd G4: 0.16 mg t-BuOK: 2.24 mg dioxane: 100.00 uL                  |
| B11 | 0.00 | 36.60  | Pd PEPPSI Ipr: 0.14 mg t-BuOK: 2.24 mg t-AmOH: 100.00 uL                        |
| C8  | 0.00 | 54.40  | MorDalPhos Pd G4: 0.17 mg KHMDS: 3.99 mg t-AmOH: 100.00 uL                      |
| C9  | 0.00 | 20.27  | JosiPhos Pd G3: 0.19 mg KHMDS: 3.99 mg t-AmOH: 100.00 uL                        |
| D5  | 0.00 | 41.27  | Pd PEPPSI Ipr: 0.14 mg KHMDS: 3.99 mg dioxane: 100.00 uL                        |
| D7  | 0.00 | 41.11  | Me3(OMe)tBuXPhos Pd G3: 0.16 mg KHMDS: 3.99 mg t-AmOH: 100.00 uL                |
| D10 | 0.00 | 34.10  | DMPDAB Pd MAH: 0.09 mg PhCPhos: 0.08 mg KHMDS: 3.99 mg t-AmOH: 100.00 uL        |
| D11 | 0.00 | 32.60  | Pd PEPPSI Ipr: 0.14 mg KHMDS: 3.99 mg t-AmOH: 100.00 uL                         |
| E1  | 0.00 | 44.98  | DMPDAB Pd MAH: 0.09 mg Ad-BippyPhos: 0.13 mg Cs2CO3: 6.52 mg dioxane: 100.00 uL |
| E2  | 0.00 | 38.32  | MorDalPhos Pd G4: 0.17 mg Cs2CO3: 6.52 mg dioxane: 100.00 uL                    |
| E3  | 0.00 | 46.12  | JosiPhos Pd G3: 0.19 mg Cs2CO3: 6.52 mg dioxane: 100.00 uL                      |
| E5  | 0.00 | 48.24  | BrettPhos Pd G3: 0.18 mg Cs2CO3: 6.52 mg dioxane: 100.00 uL                     |
| E6  | 0.00 | 35.60  | [Pd(bippyPhos)(allyl)]OTf: 0.16 mg Cs2CO3: 6.52 mg dioxane: 100.00 uL           |

|     |      |       |                                                                                                         |
|-----|------|-------|---------------------------------------------------------------------------------------------------------|
| E8  | 0.00 | 41.10 | Cs <sub>2</sub> CO <sub>3</sub> : 6.52 mg MorDalPhos Pd G4:<br>0.17 mg t-AmOH: 100.00 uL                |
| E9  | 0.00 | 48.02 | Cs <sub>2</sub> CO <sub>3</sub> : 6.52 mg JosiPhos Pd G3: 0.19<br>mg t-AmOH: 100.00 uL                  |
| E11 | 0.00 | 22.26 | Cs <sub>2</sub> CO <sub>3</sub> : 6.52 mg BrettPhos Pd G3: 0.18<br>mg t-AmOH: 100.00 uL                 |
| F3  | 0.00 | 32.93 | Cs <sub>2</sub> CO <sub>3</sub> : 6.52 mg (tBu)PhCPhos Pd G4:<br>0.16 mg dioxane: 100.00 uL             |
| F4  | 0.00 | 49.77 | Cs <sub>2</sub> CO <sub>3</sub> : 6.52 mg DMPDAB Pd MAH: 0.09<br>mg PhCPhos: 0.08 mg dioxane: 100.00 uL |
| F5  | 0.00 | 39.18 | Cs <sub>2</sub> CO <sub>3</sub> : 6.52 mg Pd PEPPSI lpr: 0.14<br>mg dioxane: 100.00 uL                  |
| F9  | 0.00 | 37.26 | Cs <sub>2</sub> CO <sub>3</sub> : 6.52 mg (tBu)PhCPhos Pd G4:<br>0.16 mg t-AmOH: 100.00 uL              |
| F10 | 0.00 | 36.96 | Cs <sub>2</sub> CO <sub>3</sub> : 6.52 mg DMPDAB Pd MAH: 0.09<br>mg PhCPhos: 0.08 mg t-AmOH: 100.00 uL  |
| F11 | 0.00 | 17.61 | Cs <sub>2</sub> CO <sub>3</sub> : 6.52 mg Pd PEPPSI lpr: 0.14<br>mg t-AmOH: 100.00 uL                   |
| F12 | 0.00 | 21.22 | Cs <sub>2</sub> CO <sub>3</sub> : 6.52 mg Gphos Pd G3: 0.18 mg t-<br>AmOH: 100.00 uL                    |
| G2  | 0.00 | 7.43  | P2-Et: 6.66 uL MorDalPhos Pd G4: 0.17<br>mg dioxane: 100.00 uL                                          |
| G3  | 0.00 | 8.45  | P2-Et: 6.66 uL JosiPhos Pd G3: 0.19<br>mg dioxane: 100.00 uL                                            |
| G5  | 0.00 | 7.49  | P2-Et: 6.66 uL BrettPhos Pd G3: 0.18<br>mg dioxane: 100.00 uL                                           |
| G6  | 0.00 | 8.10  | P2-Et: 6.66 uL [Pd(bippyPhos)(allyl)]OTf:<br>0.16 mg dioxane: 100.00 uL                                 |
| G8  | 0.00 | 15.96 | P2-Et: 6.66 uL MorDalPhos Pd G4: 0.17<br>mg t-AmOH: 100.00 uL                                           |
| G9  | 0.00 | 12.35 | P2-Et: 6.66 uL JosiPhos Pd G3: 0.19 mg t-<br>AmOH: 100.00 uL                                            |
| G11 | 0.00 | 0.00  | P2-Et: 6.66 uL BrettPhos Pd G3: 0.18<br>mg t-AmOH: 100.00 uL                                            |
| G12 | 0.00 | 5.50  | P2-Et: 6.66 uL [Pd(bippyPhos)(allyl)]OTf:<br>0.16 mg t-AmOH: 100.00 uL                                  |
| H3  | 0.00 | 7.36  | P2-Et: 6.66 uL (tBu)PhCPhos Pd G4: 0.16<br>mg dioxane: 100.00 uL                                        |
| H4  | 0.00 | 10.81 | P2-Et: 6.66 uL DMPDAB Pd MAH: 0.09<br>mg PhCPhos: 0.08 mg dioxane: 100.00 uL                            |
| H5  | 0.00 | 3.46  | P2-Et: 6.66 uL Pd PEPPSI lpr: 0.14                                                                      |

|     |      |      |                                                                          |
|-----|------|------|--------------------------------------------------------------------------|
|     |      |      | mg dioxane: 100.00 uL                                                    |
| H9  | 0.00 | 4.67 | P2-Et: 6.66 uL (tBu)PhCPhos Pd G4: 0.16 mg t-AmOH: 100.00 uL             |
| H10 | 0.00 | 9.61 | P2-Et: 6.66 uL DMPDAB Pd MAH: 0.09 mg PhCPhos: 0.08 mg t-AmOH: 100.00 uL |
| H11 | 0.00 | 6.63 | P2-Et: 6.66 uL Pd PEPPSI Ipr: 0.14 mg t-AmOH: 100.00 uL                  |
| H12 | 0.00 | 3.04 | P2-Et: 6.66 uL Gphos Pd G3: 0.18 mg t-AmOH: 100.00 uL                    |

Buchwald-Hartwig primary amine screening plate (sterically hindered primary amine)

| Cell ID | Desired Product (%)                     | Reactant (%)                   | Reactant (%)                   | Components                                                                 |
|---------|-----------------------------------------|--------------------------------|--------------------------------|----------------------------------------------------------------------------|
|         | N-(2-phenylpropan-2-yl)quinolin-4-amine | CUMYLAMINE (BT107694, TOXIC C) | 4-BROMOQUINOLINE (BT117687, B) |                                                                            |
|         | Max Resp:988515.6                       | Max Resp:0.0                   | Max Resp:605374.8              |                                                                            |
|         | m/z:263                                 | m/z:136                        | m/z:208                        |                                                                            |
|         |                                         |                                |                                |                                                                            |
| D2      | 31.57                                   | 0.00                           | 0.00                           | AdBrettPhos Pd G3: 0.20 mg KHMDS: 3.99 mg dioxane: 100.00 uL               |
| B9      | 100.00                                  | 0.00                           | 0.17                           | (tBu)PhCPhos Pd G4: 0.16 mg t-BuOK: 2.24 mg t-AmOH: 100.00 uL              |
| D5      | 38.58                                   | 0.00                           | 0.17                           | Pd PEPPSI Ipr: 0.14 mg KHMDS: 3.99 mg dioxane: 100.00 uL                   |
| B4      | 2.16                                    | 0.00                           | 0.17                           | PhCPhos: 0.08 mg t-BuOK: 2.24 mg DMPDAB Pd MAH: 0.09 mg dioxane: 100.00 uL |
| H3      | 1.62                                    | 0.00                           | 0.17                           | (tBu)PhCPhos Pd G4: 0.16 mg P2-Et: 6.66 uL dioxane: 100.00 uL              |
| E3      | 0.00                                    | 0.00                           | 0.17                           | JosiPhos Pd G3: 0.19 mg Cs2CO3: 6.52 mg dioxane: 100.00 uL                 |
| B6      | 3.59                                    | 0.00                           | 0.18                           | Gphos Pd G3: 0.18 mg t-BuOK: 2.24 mg dioxane:                              |

|     |      |      |      |                                                                                |
|-----|------|------|------|--------------------------------------------------------------------------------|
|     |      |      |      | 100.00 uL                                                                      |
| H9  | 1.36 | 0.00 | 0.18 | (tBu)PhCPhos Pd G4: 0.16 mg P2-Et: 6.66 uL t-AmOH: 100.00 uL                   |
| H7  | 0.00 | 0.00 | 0.18 | Me3(OMe)tBuXPhos Pd G3: 0.16 mg P2-Et: 6.66 uL t-AmOH: 100.00 uL               |
| E9  | 3.07 | 0.00 | 0.19 | JosiPhos Pd G3: 0.19 mg Cs2CO3: 6.52 mg t-AmOH: 100.00 uL                      |
| H6  | 0.00 | 0.00 | 0.19 | Gphos Pd G3: 0.18 mg P2-Et: 6.66 uL dioxane: 100.00 uL                         |
| G5  | 0.00 | 0.00 | 0.19 | BrettPhos Pd G3: 0.18 mg P2-Et: 6.66 uL dioxane: 100.00 uL                     |
| E2  | 1.22 | 0.00 | 0.21 | Cs2CO3: 6.52 mg MorDalPhos Pd G4: 0.17 mg dioxane: 100.00 uL                   |
| B7  | 0.00 | 0.00 | 0.21 | Me3(OMe)tBuXPhos Pd G3: 0.16 mg t-BuOK: 2.24 mg t-AmOH: 100.00 uL              |
| A7  | 0.00 | 0.00 | 0.21 | t-BuOK: 2.24 mg Ad-BippyPhos: 0.13 mg DMPDAB Pd MAH: 0.09 mg t-AmOH: 100.00 uL |
| F11 | 0.00 | 0.00 | 0.22 | Pd PEPPSI Ipr: 0.14 mg Cs2CO3: 6.52 mg t-AmOH: 100.00 uL                       |
| H4  | 0.00 | 0.00 | 0.23 | PhCPhos: 0.08 mg P2-Et: 6.66 uL DMPDAB Pd MAH: 0.09 mg dioxane: 100.00 uL      |
| F5  | 0.00 | 0.00 | 0.23 | Pd PEPPSI Ipr: 0.14 mg Cs2CO3: 6.52 mg dioxane: 100.00 uL                      |
| C5  | 4.29 | 0.00 | 0.26 | BrettPhos Pd G3: 0.18 mg KHMDS: 3.99 mg dioxane: 100.00 uL                     |
| H2  | 0.00 | 0.00 | 0.27 | AdBrettPhos Pd G3: 0.20 mg P2-Et: 6.66 uL dioxane: 100.00 uL                   |
| F4  | 0.00 | 0.00 | 0.27 | PhCPhos: 0.08 mg Cs2CO3: 6.52 mg DMPDAB Pd MAH: 0.09 mg dioxane: 100.00 uL     |

|     |       |      |       |                                                                               |
|-----|-------|------|-------|-------------------------------------------------------------------------------|
| B3  | 14.54 | 0.00 | 0.28  | (tBu)PhCPhos Pd G4: 0.16 mg t-BuOK: 2.24 mg dioxane: 100.00 uL                |
| C6  | 43.62 | 0.00 | 0.31  | [Pd(bippyPhos)(allyl)]OTf: 0.16 mg KHMDS: 3.99 mg dioxane: 100.00 uL          |
| G12 | 1.79  | 0.00 | 0.31  | [Pd(bippyPhos)(allyl)]OTf: 0.16 mg P2-Et: 6.66 uL t-AmOH: 100.00 uL           |
| F2  | 0.00  | 0.00 | 0.34  | AdBrettPhos Pd G3: 0.20 mg Cs2CO3: 6.52 mg dioxane: 100.00 uL                 |
| F9  | 14.12 | 0.00 | 0.37  | (tBu)PhCPhos Pd G4: 0.16 mg Cs2CO3: 6.52 mg t-AmOH: 100.00 uL                 |
| G3  | 0.00  | 0.00 | 0.60  | JosiPhos Pd G3: 0.19 mg P2-Et: 6.66 uL dioxane: 100.00 uL                     |
| G4  | 0.00  | 0.00 | 0.82  | tBuBrettPhos Pd G3: 0.17 mg P2-Et: 6.66 uL dioxane: 100.00 uL                 |
| C10 | 0.00  | 0.00 | 8.76  | tBuBrettPhos Pd G3: 0.17 mg KHMDS: 3.99 mg t-AmOH: 100.00 uL                  |
| F10 | 3.30  | 0.00 | 9.36  | PhCPhos: 0.08 mg Cs2CO3: 6.52 mg DMPDAB Pd MAH: 0.09 mg t-AmOH: 100.00 uL     |
| C8  | 0.00  | 0.00 | 9.76  | KHMDS: 3.99 mg MorDalPhos Pd G4: 0.17 mg t-AmOH: 100.00 uL                    |
| D6  | 41.40 | 0.00 | 15.78 | Gphos Pd G3: 0.18 mg KHMDS: 3.99 mg dioxane: 100.00 uL                        |
| H5  | 0.00  | 0.00 | 17.00 | Pd PEPSI lpr: 0.14 mg P2-Et: 6.66 uL dioxane: 100.00 uL                       |
| G11 | 0.00  | 0.00 | 18.60 | BrettPhos Pd G3: 0.18 mg P2-Et: 6.66 uL t-AmOH: 100.00 uL                     |
| C7  | 0.00  | 0.00 | 22.40 | Ad-BippyPhos: 0.13 mg KHMDS: 3.99 mg DMPDAB Pd MAH: 0.09 mg t-AmOH: 100.00 uL |
| F12 | 1.47  | 0.00 | 22.48 | Gphos Pd G3: 0.18                                                             |



|     |       |      |       |                                                                                                          |
|-----|-------|------|-------|----------------------------------------------------------------------------------------------------------|
|     |       |      |       | mg Cs <sub>2</sub> CO <sub>3</sub> : 6.52 mg t-AmOH: 100.00 uL                                           |
| H10 | 0.00  | 0.00 | 22.70 | PhCPhos: 0.08 mg P2-Et: 6.66 uL DMPDAB Pd MAH: 0.09 mg t-AmOH: 100.00 uL                                 |
| E10 | 0.00  | 0.00 | 23.06 | tBuBrettPhos Pd G3: 0.17 mg Cs <sub>2</sub> CO <sub>3</sub> : 6.52 mg t-AmOH: 100.00 uL                  |
| G9  | 0.00  | 0.00 | 23.60 | JosiPhos Pd G3: 0.19 mg P2-Et: 6.66 uL t-AmOH: 100.00 uL                                                 |
| D1  | 45.35 | 0.00 | 23.64 | Me <sub>3</sub> (OMe)tBuXPhos Pd G3: 0.16 mg KHMDs: 3.99 mg dioxane: 100.00 uL                           |
| D11 | 13.59 | 0.00 | 26.47 | Pd PEPPSI Ipr: 0.14 mg KHMDs: 3.99 mg t-AmOH: 100.00 uL                                                  |
| B10 | 51.09 | 0.00 | 27.32 | PhCPhos: 0.08 mg t-BuOK: 2.24 mg DMPDAB Pd MAH: 0.09 mg t-AmOH: 100.00 uL                                |
| A9  | 2.58  | 0.00 | 28.92 | JosiPhos Pd G3: 0.19 mg t-BuOK: 2.24 mg t-AmOH: 100.00 uL                                                |
| A1  | 2.80  | 0.00 | 29.30 | Ad-BippyPhos: 0.13 mg t-BuOK: 2.24 mg DMPDAB Pd MAH: 0.09 mg dioxane: 100.00 uL                          |
| C11 | 0.00  | 0.00 | 30.17 | BrettPhos Pd G3: 0.18 mg KHMDs: 3.99 mg t-AmOH: 100.00 uL                                                |
| E7  | 13.36 | 0.00 | 31.45 | Ad-BippyPhos: 0.13 mg Cs <sub>2</sub> CO <sub>3</sub> : 6.52 mg DMPDAB Pd MAH: 0.09 mg t-AmOH: 100.00 uL |
| G7  | 1.47  | 0.00 | 31.67 | Ad-BippyPhos: 0.13 mg P2-Et: 6.66 uL DMPDAB Pd MAH: 0.09 mg t-AmOH: 100.00 uL                            |
| A6  | 0.00  | 0.00 | 32.67 | [Pd(bippyPhos)(allyl)]OTf: 0.16 mg t-BuOK: 2.24 mg dioxane: 100.00 uL                                    |
| B11 | 0.00  | 0.00 | 35.03 | Pd PEPPSI Ipr: 0.14 mg t-BuOK: 2.24 mg t-AmOH: 100.00 uL                                                 |

|     |       |      |       |                                                                             |
|-----|-------|------|-------|-----------------------------------------------------------------------------|
| G8  | 0.00  | 0.00 | 35.83 | P2-Et: 6.66 uL MorDalPhos<br>Pd G4: 0.17 mg t-AmOH:<br>100.00 uL            |
| F7  | 0.00  | 0.00 | 36.48 | Me3(OMe)tBuXPhos Pd G3:<br>0.16 mg Cs2CO3: 6.52 mg t-<br>AmOH: 100.00 uL    |
| H8  | 0.00  | 0.00 | 37.87 | AdBrettPhos Pd G3: 0.20<br>mg P2-Et: 6.66 uL t-AmOH:<br>100.00 uL           |
| A3  | 0.00  | 0.00 | 37.98 | JosiPhos Pd G3: 0.19 mg t-<br>BuOK: 2.24 mg dioxane:<br>100.00 uL           |
| D8  | 0.00  | 0.00 | 38.22 | AdBrettPhos Pd G3: 0.20<br>mg KHMDs: 3.99 mg t-<br>AmOH: 100.00 uL          |
| E12 | 21.42 | 0.00 | 38.44 | [Pd(bippyPhos)(allyl)]OTf:<br>0.16 mg Cs2CO3: 6.52 mg t-<br>AmOH: 100.00 uL |
| D7  | 0.00  | 0.00 | 39.34 | Me3(OMe)tBuXPhos Pd G3:<br>0.16 mg KHMDs: 3.99 mg t-<br>AmOH: 100.00 uL     |
| A10 | 0.00  | 0.00 | 39.79 | tBuBrettPhos Pd G3: 0.17<br>mg t-BuOK: 2.24 mg t-<br>AmOH: 100.00 uL        |
| G10 | 0.00  | 0.00 | 40.15 | tBuBrettPhos Pd G3: 0.17<br>mg P2-Et: 6.66 uL t-AmOH:<br>100.00 uL          |
| D9  | 8.40  | 0.00 | 40.26 | (tBu)PhCPhos Pd G4: 0.16<br>mg KHMDs: 3.99 mg t-<br>AmOH: 100.00 uL         |
| A8  | 0.00  | 0.00 | 40.51 | t-BuOK: 2.24<br>mg MorDalPhos Pd G4: 0.17<br>mg t-AmOH: 100.00 uL           |
| C12 | 9.07  | 0.00 | 41.23 | [Pd(bippyPhos)(allyl)]OTf:<br>0.16 mg KHMDs: 3.99 mg t-<br>AmOH: 100.00 uL  |
| B12 | 2.56  | 0.00 | 41.45 | Gphos Pd G3: 0.18 mg T-<br>BuOK: 2.24 mg t-AmOH:<br>100.00 uL               |
| E6  | 6.42  | 0.00 | 41.67 | [Pd(bippyPhos)(allyl)]OTf:<br>0.16 mg Cs2CO3: 6.52<br>mg dioxane: 100.00 uL |
| D12 | 0.00  | 0.00 | 41.75 | Gphos Pd G3: 0.18<br>mg KHMDs: 3.99 mg t-                                   |

|     |      |      |       |                                                                                         |
|-----|------|------|-------|-----------------------------------------------------------------------------------------|
|     |      |      |       | AmOH: 100.00 uL                                                                         |
| G6  | 0.00 | 0.00 | 41.98 | [Pd(bippyPhos)(allyl)]OTf:<br>0.16 mg P2-Et: 6.66<br>uL dioxane: 100.00 uL              |
| H1  | 0.00 | 0.00 | 42.23 | Me3(OMe)tBuXPhos Pd G3:<br>0.16 mg P2-Et: 6.66<br>uL dioxane: 100.00 uL                 |
| E11 | 0.00 | 0.00 | 42.40 | BrettPhos Pd G3: 0.18<br>mg Cs2CO3: 6.52 mg t-<br>AmOH: 100.00 uL                       |
| B5  | 2.27 | 0.00 | 42.59 | Pd PEPPSI lpr: 0.14 mg t-<br>BuOK: 2.24 mg dioxane:<br>100.00 uL                        |
| H11 | 0.00 | 0.00 | 42.71 | Pd PEPPSI lpr: 0.14 mg P2-<br>Et: 6.66 uL t-AmOH: 100.00<br>uL                          |
| C9  | 0.00 | 0.00 | 44.16 | JosiPhos Pd G3: 0.19<br>mg KHMDS: 3.99 mg t-<br>AmOH: 100.00 uL                         |
| A12 | 7.38 | 0.00 | 44.62 | [Pd(bippyPhos)(allyl)]OTf:<br>0.16 mg t-BuOK: 2.24 mg t-<br>AmOH: 100.00 uL             |
| E8  | 0.00 | 0.00 | 45.86 | Cs2CO3: 6.52<br>mg MorDalPhos Pd G4: 0.17<br>mg t-AmOH: 100.00 uL                       |
| H12 | 3.66 | 0.00 | 47.14 | Gphos Pd G3: 0.18 mg P2-Et:<br>6.66 uL t-AmOH: 100.00 uL                                |
| C1  | 0.00 | 0.00 | 47.69 | Ad-BippyPhos: 0.13<br>mg KHMDS: 3.99<br>mg DMPDAB Pd MAH: 0.09<br>mg dioxane: 100.00 uL |
| B8  | 0.00 | 0.00 | 49.38 | AdBrettPhos Pd G3: 0.20<br>mg t-BuOK: 2.24 mg t-<br>AmOH: 100.00 uL                     |
| E5  | 0.00 | 0.00 | 50.29 | BrettPhos Pd G3: 0.18<br>mg Cs2CO3: 6.52<br>mg dioxane: 100.00 uL                       |
| F3  | 0.00 | 0.00 | 51.15 | (tBu)PhCPhos Pd G4: 0.16<br>mg Cs2CO3: 6.52<br>mg dioxane: 100.00 uL                    |
| F6  | 0.00 | 0.00 | 51.51 | Gphos Pd G3: 0.18<br>mg Cs2CO3: 6.52<br>mg dioxane: 100.00 uL                           |

|     |      |      |       |                                                                                          |
|-----|------|------|-------|------------------------------------------------------------------------------------------|
| D4  | 0.00 | 0.00 | 51.79 | PhCPhos: 0.08 mg KHMDS:<br>3.99 mg DMPDAB Pd MAH:<br>0.09 mg dioxane: 100.00 uL          |
| A11 | 0.00 | 0.00 | 54.00 | BrettPhos Pd G3: 0.18 mg t-<br>BuOK: 2.24 mg t-AmOH:<br>100.00 uL                        |
| E4  | 0.00 | 0.00 | 54.97 | tBuBrettPhos Pd G3: 0.17<br>mg Cs2CO3: 6.52<br>mg dioxane: 100.00 uL                     |
| B1  | 1.27 | 0.00 | 56.81 | Me3(OMe)tBuXPhos Pd G3:<br>0.16 mg t-BuOK: 2.24<br>mg dioxane: 100.00 uL                 |
| C3  | 2.93 | 0.00 | 57.81 | JosiPhos Pd G3: 0.19<br>mg KHMDS: 3.99<br>mg dioxane: 100.00 uL                          |
| D3  | 0.00 | 0.00 | 58.08 | (tBu)PhCPhos Pd G4: 0.16<br>mg KHMDS: 3.99<br>mg dioxane: 100.00 uL                      |
| F8  | 0.00 | 0.00 | 58.26 | AdBrettPhos Pd G3: 0.20<br>mg Cs2CO3: 6.52 mg t-<br>AmOH: 100.00 uL                      |
| G2  | 0.00 | 0.00 | 58.85 | P2-Et: 6.66 uL MorDalPhos<br>Pd G4: 0.17 mg dioxane:<br>100.00 uL                        |
| C4  | 0.00 | 0.00 | 59.15 | tBuBrettPhos Pd G3: 0.17<br>mg KHMDS: 3.99<br>mg dioxane: 100.00 uL                      |
| C2  | 0.00 | 0.00 | 61.07 | KHMDS: 3.99<br>mg MorDalPhos Pd G4: 0.17<br>mg dioxane: 100.00 uL                        |
| G1  | 1.12 | 0.00 | 63.25 | Ad-BippyPhos: 0.13 mg P2-<br>Et: 6.66 uL DMPDAB Pd<br>MAH: 0.09 mg dioxane:<br>100.00 uL |
| D10 | 0.00 | 0.00 | 63.63 | PhCPhos: 0.08 mg KHMDS:<br>3.99 mg DMPDAB Pd MAH:<br>0.09 mg t-AmOH: 100.00 uL           |
| A4  | 0.00 | 0.00 | 64.65 | tBuBrettPhos Pd G3: 0.17<br>mg t-BuOK: 2.24<br>mg dioxane: 100.00 uL                     |
| E1  | 3.69 | 0.00 | 64.68 | Ad-BippyPhos: 0.13<br>mg Cs2CO3: 6.52<br>mg DMPDAB Pd MAH: 0.09<br>mg dioxane: 100.00 uL |

|    |      |      |        |                                                                    |
|----|------|------|--------|--------------------------------------------------------------------|
| A5 | 0.00 | 0.00 | 65.13  | BrettPhos Pd G3: 0.18 mg t-BuOK: 2.24 mg dioxane: 100.00 uL        |
| B2 | 0.00 | 0.00 | 67.34  | AdBrettPhos Pd G3: 0.20 mg t-BuOK: 2.24 mg dioxane: 100.00 uL      |
| F1 | 0.00 | 0.00 | 71.04  | Me3(OMe)tBuXPhos Pd G3: 0.16 mg Cs2CO3: 6.52 mg dioxane: 100.00 uL |
| A2 | 2.13 | 0.00 | 100.00 | t-BuOK: 2.24 mg MorDalPhos Pd G4: 0.17 mg dioxane: 100.00 uL       |

Buchwald-Hartwig secondary amine and aniline screening kit (secondary amine)

| Cell ID | Desired Product (%)                                                  | Reactant (%)                      | Components                                                                               |
|---------|----------------------------------------------------------------------|-----------------------------------|------------------------------------------------------------------------------------------|
|         | tert-butyl 4-{1H-pyrrolo[2,3-b]pyridin-5-yl}piperazine-1-carboxylate | 5-bromo-1H-pyrrolo[2,3-b]pyridine |                                                                                          |
|         | Max Resp:375059.5                                                    | Max Resp:194346.0                 |                                                                                          |
|         | m/z:303                                                              | m/z:197                           |                                                                                          |
| C3      | 100.00                                                               | 41.97                             | DMPDAB Pd MAH: 0.09 mg Triisobutylphosphatane: 0.07 uL KHMDS: 3.99 mg dioxane: 100.00 uL |
| C5      | 88.80                                                                | 49.35                             | [Pd(bippyPhos)(allyl)]OTf: 0.16 mg KHMDS: 3.99 mg dioxane: 100.00 uL                     |
| C4      | 83.17                                                                | 27.68                             | RuPhos Pd G4: 0.17 mg KHMDS: 3.99 mg dioxane: 100.00 uL                                  |
| A7      | 82.72                                                                | 27.60                             | Qphos Pd G3: 0.22 mg t-BuOK: 2.24 mg t-AmOH: 100.00 uL                                   |
| C6      | 73.81                                                                | 43.75                             | tBuXPhos Pd G3: 0.16 mg KHMDS: 3.99 mg dioxane: 100.00 uL                                |
| D3      | 73.61                                                                | 37.70                             | DMPDAB Pd MAH: 0.09 mg Brett/C/JackiePhos: 0.15 mg KHMDS: 3.99 mg dioxane: 100.00 uL     |
| C1      | 70.66                                                                | 34.88                             | Qphos Pd G3: 0.22 mg KHMDS: 3.99 mg dioxane: 100.00 uL                                   |
| D2      | 70.06                                                                | 33.19                             | DMPDAB Pd MAH: 0.09 mg Brett/Ru/JackiePhos: 0.16 mg KHMDS: 3.99 mg dioxane: 100.00 uL    |

|     |       |       |                                                                                      |
|-----|-------|-------|--------------------------------------------------------------------------------------|
| C7  | 68.42 | 34.29 | Qphos Pd G3: 0.22 mg KHMDS: 3.99 mg t-AmOH: 100.00 uL                                |
| D4  | 65.26 | 47.87 | tBuBrettPhos Pd G3: 0.17 mg KHMDS: 3.99 mg dioxane: 100.00 uL                        |
| B12 | 59.47 | 30.62 | BrettPhos Pd G3: 0.18 mg t-BuOK: 2.24 mg t-AmOH: 100.00 uL                           |
| C2  | 54.67 | 55.07 | Pd PEPSI lpr: 0.14 mg KHMDS: 3.99 mg dioxane: 100.00 uL                              |
| C10 | 53.91 | 48.63 | RuPhos Pd G4: 0.17 mg KHMDS: 3.99 mg t-AmOH: 100.00 uL                               |
| D1  | 53.58 | 42.85 | P(tBu) <sub>3</sub> Pd G4: 0.11 mg KHMDS: 3.99 mg dioxane: 100.00 uL                 |
| D12 | 53.54 | 29.49 | BrettPhos Pd G3: 0.18 mg KHMDS: 3.99 mg t-AmOH: 100.00 uL                            |
| D5  | 51.66 | 54.34 | Ephos Pd G4: 0.18 mg KHMDS: 3.99 mg dioxane: 100.00 uL                               |
| D6  | 47.18 | 46.61 | BrettPhos Pd G3: 0.18 mg KHMDS: 3.99 mg dioxane: 100.00 uL                           |
| A5  | 45.10 | 60.25 | [Pd(bippyPhos)(allyl)]OTf: 0.16 mg t-BuOK: 2.24 mg dioxane: 100.00 uL                |
| A1  | 41.12 | 40.94 | Qphos Pd G3: 0.22 mg t-BuOK: 2.24 mg dioxane: 100.00 uL                              |
| B1  | 38.87 | 73.90 | P(tBu) <sub>3</sub> Pd G4: 0.11 mg t-BuOK: 2.24 mg dioxane: 100.00 uL                |
| A12 | 35.57 | 31.99 | tBuXPhos Pd G3: 0.16 mg t-BuOK: 2.24 mg t-AmOH: 100.00 uL                            |
| C12 | 31.18 | 32.08 | tBuXPhos Pd G3: 0.16 mg KHMDS: 3.99 mg t-AmOH: 100.00 uL                             |
| A11 | 25.69 | 41.10 | [Pd(bippyPhos)(allyl)]OTf: 0.16 mg t-BuOK: 2.24 mg t-AmOH: 100.00 uL                 |
| B9  | 24.84 | 35.14 | DMPDAB Pd MAH: 0.09 mg Brett/C/JackiePhos: 0.15 mg t-BuOK: 2.24 mg t-AmOH: 100.00 uL |
| D9  | 22.17 | 43.02 | DMPDAB Pd MAH: 0.09 mg Brett/C/JackiePhos: 0.15 mg KHMDS: 3.99 mg t-AmOH: 100.00 uL  |
| B7  | 20.50 | 43.65 | P(tBu) <sub>3</sub> Pd G4: 0.11 mg t-BuOK: 2.24 mg t-AmOH: 100.00 uL                 |
| D10 | 18.04 | 0.00  | tBuBrettPhos Pd G3: 0.17 mg KHMDS: 3.99 mg t-AmOH: 100.00 uL                         |
| B10 | 17.04 | 37.68 | tBuBrettPhos Pd G3: 0.17 mg t-BuOK: 2.24                                             |

|     |       |        |                                                                                         |
|-----|-------|--------|-----------------------------------------------------------------------------------------|
|     |       |        | mg t-AmOH: 100.00 uL                                                                    |
| C11 | 17.01 | 43.32  | [Pd(bippyPhos)(allyl)]OTf: 0.16 mg KHMDS: 3.99 mg t-AmOH: 100.00 uL                     |
| B6  | 10.46 | 38.77  | BrettPhos Pd G3: 0.18 mg t-BuOK: 2.24 mg dioxane: 100.00 uL                             |
| A6  | 9.54  | 24.93  | tBuXPhos Pd G3: 0.16 mg t-BuOK: 2.24 mg dioxane: 100.00 uL                              |
| B2  | 6.48  | 100.00 | DMPDAB Pd MAH: 0.09 mg Brett/Ru/JackiePhos: 0.16 mg t-BuOK: 2.24 mg dioxane: 100.00 uL  |
| B4  | 3.55  | 74.22  | tBuBrettPhos Pd G3: 0.17 mg t-BuOK: 2.24 mg dioxane: 100.00 uL                          |
| A4  | 3.52  | 7.55   | RuPhos Pd G4: 0.17 mg t-BuOK: 2.24 mg dioxane: 100.00 uL                                |
| G4  | 0.00  | 38.35  | RuPhos Pd G4: 0.17 mg P2-Et: 6.66 uL dioxane: 100.00 uL                                 |
| G5  | 0.00  | 51.15  | [Pd(bippyPhos)(allyl)]OTf: 0.16 mg P2-Et: 6.66 uL dioxane: 100.00 uL                    |
| G6  | 0.00  | 54.40  | tBuXPhos Pd G3: 0.16 mg P2-Et: 6.66 uL dioxane: 100.00 uL                               |
| G7  | 0.00  | 29.67  | Qphos Pd G3: 0.22 mg P2-Et: 6.66 uL t-AmOH: 100.00 uL                                   |
| G8  | 0.00  | 35.26  | Pd PEPPSI Ipr: 0.14 mg P2-Et: 6.66 uL t-AmOH: 100.00 uL                                 |
| G9  | 0.00  | 24.55  | DMPDAB Pd MAH: 0.09 mg Triisobutylphosphatane: 0.07 uL P2-Et: 6.66 uL t-AmOH: 100.00 uL |
| G10 | 0.00  | 35.56  | RuPhos Pd G4: 0.17 mg P2-Et: 6.66 uL t-AmOH: 100.00 uL                                  |
| G11 | 0.00  | 30.41  | [Pd(bippyPhos)(allyl)]OTf: 0.16 mg P2-Et: 6.66 uL t-AmOH: 100.00 uL                     |
| G12 | 0.00  | 34.17  | tBuXPhos Pd G3: 0.16 mg P2-Et: 6.66 uL t-AmOH: 100.00 uL                                |
| H1  | 0.00  | 31.56  | P(tBu) <sub>3</sub> Pd G4: 0.11 mg P2-Et: 6.66 uL dioxane: 100.00 uL                    |
| H2  | 0.00  | 60.56  | DMPDAB Pd MAH: 0.09 mg Brett/Ru/JackiePhos: 0.16 mg P2-Et: 6.66 uL dioxane: 100.00 uL   |
| H3  | 0.00  | 29.83  | DMPDAB Pd MAH: 0.09 mg Brett/C/JackiePhos: 0.15 mg P2-Et: 6.66 uL dioxane: 100.00 uL    |

|     |      |       |                                                                                           |
|-----|------|-------|-------------------------------------------------------------------------------------------|
| H4  | 0.00 | 36.62 | tBuBrettPhos Pd G3: 0.17 mg P2-Et: 6.66 uL dioxane: 100.00 uL                             |
| H5  | 0.00 | 34.23 | Ephos Pd G4: 0.18 mg P2-Et: 6.66 uL dioxane: 100.00 uL                                    |
| H6  | 0.00 | 42.34 | BrettPhos Pd G3: 0.18 mg P2-Et: 6.66 uL dioxane: 100.00 uL                                |
| H7  | 0.00 | 37.07 | P(tBu) <sub>3</sub> Pd G4: 0.11 mg P2-Et: 6.66 uL t-AmOH: 100.00 uL                       |
| H8  | 0.00 | 30.38 | DMPDAB Pd MAH: 0.09 mg Brett/Ru/JackiePhos: 0.16 mg P2-Et: 6.66 uL t-AmOH: 100.00 uL      |
| H9  | 0.00 | 22.05 | DMPDAB Pd MAH: 0.09 mg Brett/C/JackiePhos: 0.15 mg P2-Et: 6.66 uL t-AmOH: 100.00 uL       |
| H10 | 0.00 | 42.85 | tBuBrettPhos Pd G3: 0.17 mg P2-Et: 6.66 uL t-AmOH: 100.00 uL                              |
| H11 | 0.00 | 39.78 | Ephos Pd G4: 0.18 mg P2-Et: 6.66 uL t-AmOH: 100.00 uL                                     |
| H12 | 0.00 | 25.73 | BrettPhos Pd G3: 0.18 mg P2-Et: 6.66 uL t-AmOH: 100.00 uL                                 |
| A2  | 0.00 | 31.07 | Pd PEPPSI Ipr: 0.14 mg t-BuOK: 2.24 mg dioxane: 100.00 uL                                 |
| A3  | 0.00 | 22.80 | DMPDAB Pd MAH: 0.09 mg Triisobutylphosphatane: 0.07 uL t-BuOK: 2.24 mg dioxane: 100.00 uL |
| A8  | 0.00 | 11.62 | Pd PEPPSI Ipr: 0.14 mg t-BuOK: 2.24 mg t-AmOH: 100.00 uL                                  |
| A9  | 0.00 | 8.05  | DMPDAB Pd MAH: 0.09 mg Triisobutylphosphatane: 0.07 uL t-BuOK: 2.24 mg t-AmOH: 100.00 uL  |
| A10 | 0.00 | 5.63  | RuPhos Pd G4: 0.17 mg T-BuOK: 2.24 mg t-AmOH: 100.00 uL                                   |
| B3  | 0.00 | 65.03 | DMPDAB Pd MAH: 0.09 mg Brett/C/JackiePhos: 0.15 mg t-BuOK: 2.24 mg dioxane: 100.00 uL     |
| B5  | 0.00 | 62.86 | Ephos Pd G4: 0.18 mg t-BuOK: 2.24 mg dioxane: 100.00 uL                                   |
| B8  | 0.00 | 40.15 | DMPDAB Pd MAH: 0.09 mg Brett/Ru/JackiePhos: 0.16 mg t-BuOK: 2.24 mg t-AmOH: 100.00 uL     |
| B11 | 0.00 | 50.07 | Ephos Pd G4: 0.18 mg t-BuOK: 2.24 mg t-AmOH: 100.00 uL                                    |



|     |      |       |                                                                                                                      |
|-----|------|-------|----------------------------------------------------------------------------------------------------------------------|
| C8  | 0.00 | 61.45 | Pd PEPPSI Ipr: 0.14 mg KHMDS: 3.99 mg t-AmOH: 100.00 uL                                                              |
| C9  | 0.00 | 45.26 | DMPDAB Pd MAH: 0.09 mg Triisobutylphosphatrane: 0.07 uL KHMDS: 3.99 mg t-AmOH: 100.00 uL                             |
| D7  | 0.00 | 32.23 | P(tBu) <sub>3</sub> Pd G4: 0.11 mg KHMDS: 3.99 mg t-AmOH: 100.00 uL                                                  |
| D8  | 0.00 | 15.10 | DMPDAB Pd MAH: 0.09 mg Brett/Ru/JackiePhos: 0.16 mg KHMDS: 3.99 mg t-AmOH: 100.00 uL                                 |
| D11 | 0.00 | 0.00  | Ephos Pd G4: 0.18 mg KHMDS: 3.99 mg t-AmOH: 100.00 uL                                                                |
| E1  | 0.00 | 0.00  | Qphos Pd G3: 0.22 mg Cs <sub>2</sub> CO <sub>3</sub> : 6.52 mg dioxane: 100.00 uL                                    |
| E2  | 0.00 | 63.51 | Pd PEPPSI Ipr: 0.14 mg Cs <sub>2</sub> CO <sub>3</sub> : 6.52 mg dioxane: 100.00 uL                                  |
| E3  | 0.00 | 0.00  | DMPDAB Pd MAH: 0.09 mg Triisobutylphosphatrane: 0.07 uL Cs <sub>2</sub> CO <sub>3</sub> : 6.52 mg dioxane: 100.00 uL |
| E4  | 0.00 | 38.07 | RuPhos Pd G4: 0.17 mg Cs <sub>2</sub> CO <sub>3</sub> : 6.52 mg dioxane: 100.00 uL                                   |
| E5  | 0.00 | 59.68 | [Pd(bippyPhos)(allyl)]OTf: 0.16 mg Cs <sub>2</sub> CO <sub>3</sub> : 6.52 mg dioxane: 100.00 uL                      |
| E6  | 0.00 | 53.00 | tBuXPhos Pd G3: 0.16 mg Cs <sub>2</sub> CO <sub>3</sub> : 6.52 mg dioxane: 100.00 uL                                 |
| E7  | 0.00 | 9.39  | Qphos Pd G3: 0.22 mg Cs <sub>2</sub> CO <sub>3</sub> : 6.52 mg t-AmOH: 100.00 uL                                     |
| E8  | 0.00 | 39.45 | Pd PEPPSI Ipr: 0.14 mg Cs <sub>2</sub> CO <sub>3</sub> : 6.52 mg t-AmOH: 100.00 uL                                   |
| E9  | 0.00 | 40.68 | DMPDAB Pd MAH: 0.09 mg Triisobutylphosphatrane: 0.07 uL Cs <sub>2</sub> CO <sub>3</sub> : 6.52 mg t-AmOH: 100.00 uL  |
| E10 | 0.00 | 47.19 | RuPhos Pd G4: 0.17 mg Cs <sub>2</sub> CO <sub>3</sub> : 6.52 mg t-AmOH: 100.00 uL                                    |
| E11 | 0.00 | 48.44 | [Pd(bippyPhos)(allyl)]OTf: 0.16 mg Cs <sub>2</sub> CO <sub>3</sub> : 6.52 mg t-AmOH: 100.00 uL                       |
| E12 | 0.00 | 43.76 | tBuXPhos Pd G3: 0.16 mg Cs <sub>2</sub> CO <sub>3</sub> : 6.52 mg t-AmOH: 100.00 uL                                  |
| F1  | 0.00 | 37.48 | P(tBu) <sub>3</sub> Pd G4: 0.11 mg Cs <sub>2</sub> CO <sub>3</sub> : 6.52 mg dioxane: 100.00 uL                      |
| F2  | 0.00 | 58.84 | DMPDAB Pd MAH: 0.09 mg Brett/Ru/JackiePhos: 0.16 mg Cs <sub>2</sub> CO <sub>3</sub> :                                |

|     |      |       |                                                                                           |
|-----|------|-------|-------------------------------------------------------------------------------------------|
|     |      |       | 6.52 mg dioxane: 100.00 uL                                                                |
| F3  | 0.00 | 37.87 | DMPDAB Pd MAH: 0.09 mg Brett/C/JackiePhos: 0.15 mg Cs2CO3: 6.52 mg dioxane: 100.00 uL     |
| F4  | 0.00 | 48.89 | tBuBrettPhos Pd G3: 0.17 mg Cs2CO3: 6.52 mg dioxane: 100.00 uL                            |
| F5  | 0.00 | 50.87 | Ephos Pd G4: 0.18 mg Cs2CO3: 6.52 mg dioxane: 100.00 uL                                   |
| F6  | 0.00 | 60.68 | BrettPhos Pd G3: 0.18 mg Cs2CO3: 6.52 mg dioxane: 100.00 uL                               |
| F7  | 0.00 | 30.67 | P(tBu)3 Pd G4: 0.11 mg Cs2CO3: 6.52 mg t-AmOH: 100.00 uL                                  |
| F8  | 0.00 | 56.88 | DMPDAB Pd MAH: 0.09 mg Brett/Ru/JackiePhos: 0.16 mg Cs2CO3: 6.52 mg t-AmOH: 100.00 uL     |
| F9  | 0.00 | 16.28 | DMPDAB Pd MAH: 0.09 mg Brett/C/JackiePhos: 0.15 mg Cs2CO3: 6.52 mg t-AmOH: 100.00 uL      |
| F10 | 0.00 | 26.53 | tBuBrettPhos Pd G3: 0.17 mg Cs2CO3: 6.52 mg t-AmOH: 100.00 uL                             |
| F11 | 0.00 | 15.00 | Ephos Pd G4: 0.18 mg Cs2CO3: 6.52 mg t-AmOH: 100.00 uL                                    |
| F12 | 0.00 | 34.37 | BrettPhos Pd G3: 0.18 mg Cs2CO3: 6.52 mg t-AmOH: 100.00 uL                                |
| G1  | 0.00 | 49.59 | Qphos Pd G3: 0.22 mg P2-Et: 6.66 uL dioxane: 100.00 uL                                    |
| G2  | 0.00 | 52.99 | Pd PEPPSI Ipr: 0.14 mg P2-Et: 6.66 uL dioxane: 100.00 uL                                  |
| G3  | 0.00 | 40.54 | DMPDAB Pd MAH: 0.09 mg Triisobutylphosphatrane: 0.07 uL P2-Et: 6.66 uL dioxane: 100.00 uL |

Buchwald secondary amine and aniline screening kit (aniline)

|         |                                                            |                                   |            |
|---------|------------------------------------------------------------|-----------------------------------|------------|
| Cell ID | Desired Product (%)                                        | Reactant (%)                      | Components |
|         | 5-methoxy-N-{1H-pyrrolo[2,3-b]pyridin-5-yl}pyridin-2-amine | 5-bromo-1H-pyrrolo[2,3-b]pyridine |            |
|         | Max Resp:328926.2                                          | Max Resp:58428.6                  |            |
|         | m/z:241                                                    | m/z:197                           |            |

|     |        |       |                                                                                                |
|-----|--------|-------|------------------------------------------------------------------------------------------------|
| B6  | 100.00 | 0.00  | BrettPhos Pd G3: 0.18 mg t-BuOK: 2.24 mg dioxane: 100.00 uL                                    |
| C11 | 84.74  | 0.00  | [Pd(bippyPhos)(allyl)]OTf: 0.16 mg KHMDS: 3.99 mg t-AmOH: 100.00 uL                            |
| B10 | 81.60  | 0.00  | tBuBrettPhos Pd G3: 0.17 mg t-BuOK: 2.24 mg t-AmOH: 100.00 uL                                  |
| B4  | 75.29  | 6.97  | tBuBrettPhos Pd G3: 0.17 mg t-BuOK: 2.24 mg dioxane: 100.00 uL                                 |
| A1  | 49.71  | 28.59 | Qphos Pd G3: 0.22 mg t-BuOK: 2.24 mg dioxane: 100.00 uL                                        |
| B12 | 44.81  | 3.63  | BrettPhos Pd G3: 0.18 mg t-BuOK: 2.24 mg t-AmOH: 100.00 uL                                     |
| C12 | 33.48  | 27.47 | tBuXPhos Pd G3: 0.16 mg KHMDS: 3.99 mg t-AmOH: 100.00 uL                                       |
| E12 | 27.75  | 33.94 | tBuXPhos Pd G3: 0.16 mg Cs <sub>2</sub> CO <sub>3</sub> : 6.52 mg t-AmOH: 100.00 uL            |
| A12 | 25.74  | 3.65  | tBuXPhos Pd G3: 0.16 mg t-BuOK: 2.24 mg t-AmOH: 100.00 uL                                      |
| C4  | 23.89  | 37.25 | RuPhos Pd G4: 0.17 mg KHMDS: 3.99 mg dioxane: 100.00 uL                                        |
| B1  | 22.86  | 1.96  | P(tBu) <sub>3</sub> Pd G4: 0.11 mg t-BuOK: 2.24 mg dioxane: 100.00 uL                          |
| D4  | 18.23  | 35.51 | tBuBrettPhos Pd G3: 0.17 mg KHMDS: 3.99 mg dioxane: 100.00 uL                                  |
| F12 | 13.76  | 50.01 | BrettPhos Pd G3: 0.18 mg Cs <sub>2</sub> CO <sub>3</sub> : 6.52 mg t-AmOH: 100.00 uL           |
| A5  | 10.62  | 96.50 | [Pd(bippyPhos)(allyl)]OTf: 0.16 mg t-BuOK: 2.24 mg dioxane: 100.00 uL                          |
| F4  | 8.28   | 49.22 | tBuBrettPhos Pd G3: 0.17 mg Cs <sub>2</sub> CO <sub>3</sub> : 6.52 mg dioxane: 100.00 uL       |
| B7  | 4.31   | 47.64 | P(tBu) <sub>3</sub> Pd G4: 0.11 mg t-BuOK: 2.24 mg t-AmOH: 100.00 uL                           |
| E11 | 4.26   | 31.42 | [Pd(bippyPhos)(allyl)]OTf: 0.16 mg Cs <sub>2</sub> CO <sub>3</sub> : 6.52 mg t-AmOH: 100.00 uL |
| D10 | 4.22   | 40.55 | tBuBrettPhos Pd G3: 0.17 mg KHMDS: 3.99 mg t-AmOH: 100.00 uL                                   |
| A4  | 4.16   | 58.39 | RuPhos Pd G4: 0.17 mg t-BuOK: 2.24 mg dioxane: 100.00 uL                                       |
| A11 | 3.95   | 64.06 | [Pd(bippyPhos)(allyl)]OTf: 0.16 mg t-BuOK: 2.24 mg t-AmOH: 100.00 uL                           |
| A2  | 0.00   | 59.99 | Pd PEPPSI Ipr: 0.14 mg t-BuOK: 2.24                                                            |

|     |      |       |                                                                                                  |
|-----|------|-------|--------------------------------------------------------------------------------------------------|
|     |      |       | mg dioxane: 100.00 uL                                                                            |
| A3  | 0.00 | 39.25 | DMPDAB Pd MAH: 0.09<br>mg Triisobutylphosphatane: 0.07 uL t-<br>BuOK: 2.24 mg dioxane: 100.00 uL |
| A6  | 0.00 | 77.72 | tBuXPhos Pd G3: 0.16 mg t-BuOK: 2.24<br>mg dioxane: 100.00 uL                                    |
| A7  | 0.00 | 29.50 | Qphos Pd G3: 0.22 mg t-BuOK: 2.24 mg t-<br>AmOH: 100.00 uL                                       |
| A8  | 0.00 | 55.71 | Pd PEPPSI Ipr: 0.14 mg t-BuOK: 2.24 mg t-<br>AmOH: 100.00 uL                                     |
| A9  | 0.00 | 65.64 | DMPDAB Pd MAH: 0.09<br>mg Triisobutylphosphatane: 0.07 uL t-<br>BuOK: 2.24 mg t-AmOH: 100.00 uL  |
| A10 | 0.00 | 42.06 | RuPhos Pd G4: 0.17 mg t-BuOK: 2.24 mg t-<br>AmOH: 100.00 uL                                      |
| B2  | 0.00 | 34.85 | DMPDAB Pd MAH: 0.09<br>mg Brett/Ru/JackiePhos: 0.16 mg t-BuOK:<br>2.24 mg dioxane: 100.00 uL     |
| B3  | 0.00 | 38.68 | DMPDAB Pd MAH: 0.09<br>mg Brett/C/JackiePhos: 0.15 mg t-BuOK:<br>2.24 mg dioxane: 100.00 uL      |
| B5  | 0.00 | 61.91 | Ephos Pd G4: 0.18 mg t-BuOK: 2.24<br>mg dioxane: 100.00 uL                                       |
| B8  | 0.00 | 51.81 | DMPDAB Pd MAH: 0.09<br>mg Brett/Ru/JackiePhos: 0.16 mg t-BuOK:<br>2.24 mg t-AmOH: 100.00 uL      |
| B9  | 0.00 | 42.28 | DMPDAB Pd MAH: 0.09<br>mg Brett/C/JackiePhos: 0.15 mg t-BuOK:<br>2.24 mg t-AmOH: 100.00 uL       |
| B11 | 0.00 | 39.82 | Ephos Pd G4: 0.18 mg T-BuOK: 2.24 mg t-<br>AmOH: 100.00 uL                                       |
| C1  | 0.00 | 84.76 | Qphos Pd G3: 0.22 mg KHMDS: 3.99<br>mg dioxane: 100.00 uL                                        |
| C2  | 0.00 | 41.75 | Pd PEPPSI Ipr: 0.14 mg KHMDS: 3.99<br>mg dioxane: 100.00 uL                                      |
| C3  | 0.00 | 42.96 | DMPDAB Pd MAH: 0.09<br>mg Triisobutylphosphatane: 0.07<br>uL KHMDS: 3.99 mg dioxane: 100.00 uL   |
| C5  | 0.00 | 68.80 | [Pd(bippyPhos)(allyl)]OTf: 0.16 mg KHMDS:<br>3.99 mg dioxane: 100.00 uL                          |
| C6  | 0.00 | 41.57 | tBuXPhos Pd G3: 0.16 mg KHMDS: 3.99<br>mg dioxane: 100.00 uL                                     |

|     |      |       |                                                                                                                     |
|-----|------|-------|---------------------------------------------------------------------------------------------------------------------|
| C7  | 0.00 | 52.30 | Qphos Pd G3: 0.22 mg KHMDS: 3.99 mg t-AmOH: 100.00 uL                                                               |
| C8  | 0.00 | 65.56 | Pd PEPSI lpr: 0.14 mg KHMDS: 3.99 mg t-AmOH: 100.00 uL                                                              |
| C9  | 0.00 | 47.51 | DMPDAB Pd MAH: 0.09 mg Triisobutylphosphatane: 0.07 uL KHMDS: 3.99 mg t-AmOH: 100.00 uL                             |
| C10 | 0.00 | 58.86 | RuPhos Pd G4: 0.17 mg KHMDS: 3.99 mg t-AmOH: 100.00 uL                                                              |
| D1  | 0.00 | 48.75 | P(tBu) <sub>3</sub> Pd G4: 0.11 mg KHMDS: 3.99 mg dioxane: 100.00 uL                                                |
| D2  | 0.00 | 44.05 | DMPDAB Pd MAH: 0.09 mg Brett/Ru/JackiePhos: 0.16 mg KHMDS: 3.99 mg dioxane: 100.00 uL                               |
| D3  | 0.00 | 38.24 | DMPDAB Pd MAH: 0.09 mg Brett/C/JackiePhos: 0.15 mg KHMDS: 3.99 mg dioxane: 100.00 uL                                |
| D5  | 0.00 | 27.77 | Ephos Pd G4: 0.18 mg KHMDS: 3.99 mg dioxane: 100.00 uL                                                              |
| D6  | 0.00 | 56.81 | BrettPhos Pd G3: 0.18 mg KHMDS: 3.99 mg dioxane: 100.00 uL                                                          |
| D7  | 0.00 | 41.96 | P(tBu) <sub>3</sub> Pd G4: 0.11 mg KHMDS: 3.99 mg t-AmOH: 100.00 uL                                                 |
| D8  | 0.00 | 33.70 | DMPDAB Pd MAH: 0.09 mg Brett/Ru/JackiePhos: 0.16 mg KHMDS: 3.99 mg t-AmOH: 100.00 uL                                |
| D9  | 0.00 | 52.31 | DMPDAB Pd MAH: 0.09 mg Brett/C/JackiePhos: 0.15 mg KHMDS: 3.99 mg t-AmOH: 100.00 uL                                 |
| D11 | 0.00 | 65.17 | Ephos Pd G4: 0.18 mg KHMDS: 3.99 mg t-AmOH: 100.00 uL                                                               |
| D12 | 0.00 | 0.00  | BrettPhos Pd G3: 0.18 mg KHMDS: 3.99 mg t-AmOH: 100.00 uL                                                           |
| E1  | 0.00 | 54.63 | Qphos Pd G3: 0.22 mg Cs <sub>2</sub> CO <sub>3</sub> : 6.52 mg dioxane: 100.00 uL                                   |
| E2  | 0.00 | 31.24 | Pd PEPSI lpr: 0.14 mg Cs <sub>2</sub> CO <sub>3</sub> : 6.52 mg dioxane: 100.00 uL                                  |
| E3  | 0.00 | 40.30 | DMPDAB Pd MAH: 0.09 mg Triisobutylphosphatane: 0.07 uL Cs <sub>2</sub> CO <sub>3</sub> : 6.52 mg dioxane: 100.00 uL |
| E4  | 0.00 | 41.19 | RuPhos Pd G4: 0.17 mg Cs <sub>2</sub> CO <sub>3</sub> : 6.52 mg dioxane: 100.00 uL                                  |

|     |      |        |                                                                                                                    |
|-----|------|--------|--------------------------------------------------------------------------------------------------------------------|
| E5  | 0.00 | 34.23  | [Pd(bippyPhos)(allyl)]OTf: 0.16 mg Cs <sub>2</sub> CO <sub>3</sub> : 6.52 mg dioxane: 100.00 uL                    |
| E6  | 0.00 | 52.27  | tBuXPhos Pd G3: 0.16 mg Cs <sub>2</sub> CO <sub>3</sub> : 6.52 mg dioxane: 100.00 uL                               |
| E7  | 0.00 | 46.44  | Qphos Pd G3: 0.22 mg Cs <sub>2</sub> CO <sub>3</sub> : 6.52 mg t-AmOH: 100.00 uL                                   |
| E8  | 0.00 | 30.78  | Pd PEPPSI Ipr: 0.14 mg Cs <sub>2</sub> CO <sub>3</sub> : 6.52 mg t-AmOH: 100.00 uL                                 |
| E9  | 0.00 | 30.61  | DMPDAB Pd MAH: 0.09 mg Triisobutylphosphatane: 0.07 uL Cs <sub>2</sub> CO <sub>3</sub> : 6.52 mg t-AmOH: 100.00 uL |
| E10 | 0.00 | 42.64  | RuPhos Pd G4: 0.17 mg Cs <sub>2</sub> CO <sub>3</sub> : 6.52 mg t-AmOH: 100.00 uL                                  |
| F1  | 0.00 | 97.00  | P(tBu) <sub>3</sub> Pd G4: 0.11 mg Cs <sub>2</sub> CO <sub>3</sub> : 6.52 mg dioxane: 100.00 uL                    |
| F2  | 0.00 | 97.91  | DMPDAB Pd MAH: 0.09 mg Brett/Ru/JackiePhos: 0.16 mg Cs <sub>2</sub> CO <sub>3</sub> : 6.52 mg dioxane: 100.00 uL   |
| F3  | 0.00 | 39.56  | DMPDAB Pd MAH: 0.09 mg Brett/C/JackiePhos: 0.15 mg Cs <sub>2</sub> CO <sub>3</sub> : 6.52 mg dioxane: 100.00 uL    |
| F5  | 0.00 | 48.86  | Ephos Pd G4: 0.18 mg Cs <sub>2</sub> CO <sub>3</sub> : 6.52 mg dioxane: 100.00 uL                                  |
| F6  | 0.00 | 71.74  | BrettPhos Pd G3: 0.18 mg Cs <sub>2</sub> CO <sub>3</sub> : 6.52 mg dioxane: 100.00 uL                              |
| F7  | 0.00 | 39.51  | P(tBu) <sub>3</sub> Pd G4: 0.11 mg Cs <sub>2</sub> CO <sub>3</sub> : 6.52 mg t-AmOH: 100.00 uL                     |
| F8  | 0.00 | 33.56  | DMPDAB Pd MAH: 0.09 mg Brett/Ru/JackiePhos: 0.16 mg Cs <sub>2</sub> CO <sub>3</sub> : 6.52 mg t-AmOH: 100.00 uL    |
| F9  | 0.00 | 19.25  | DMPDAB Pd MAH: 0.09 mg Brett/C/JackiePhos: 0.15 mg Cs <sub>2</sub> CO <sub>3</sub> : 6.52 mg t-AmOH: 100.00 uL     |
| F10 | 0.00 | 48.38  | tBuBrettPhos Pd G3: 0.17 mg Cs <sub>2</sub> CO <sub>3</sub> : 6.52 mg t-AmOH: 100.00 uL                            |
| F11 | 0.00 | 100.00 | Ephos Pd G4: 0.18 mg Cs <sub>2</sub> CO <sub>3</sub> : 6.52 mg t-AmOH: 100.00 uL                                   |
| G1  | 0.00 | 40.68  | Qphos Pd G3: 0.22 mg P2-Et: 6.66 uL dioxane: 100.00 uL                                                             |
| G2  | 0.00 | 45.31  | Pd PEPPSI Ipr: 0.14 mg P2-Et: 6.66 uL dioxane: 100.00 uL                                                           |
| G3  | 0.00 | 60.02  | DMPDAB Pd MAH: 0.09                                                                                                |

|     |      |       |                                                                                                |
|-----|------|-------|------------------------------------------------------------------------------------------------|
|     |      |       | mg Triisobutylphosphatrane: 0.07 uL P2-Et:<br>6.66 uL dioxane: 100.00 uL                       |
| G4  | 0.00 | 69.49 | RuPhos Pd G4: 0.17 mg P2-Et: 6.66<br>uL dioxane: 100.00 uL                                     |
| G5  | 0.00 | 28.81 | [Pd(bippyPhos)(allyl)]OTf: 0.16 mg P2-Et:<br>6.66 uL dioxane: 100.00 uL                        |
| G6  | 0.00 | 34.06 | tBuXPhos Pd G3: 0.16 mg P2-Et: 6.66<br>uL dioxane: 100.00 uL                                   |
| G7  | 0.00 | 30.20 | Qphos Pd G3: 0.22 mg P2-Et: 6.66 uL t-<br>AmOH: 100.00 uL                                      |
| G8  | 0.00 | 28.83 | Pd PEPSI lpr: 0.14 mg P2-Et: 6.66 uL t-<br>AmOH: 100.00 uL                                     |
| G9  | 0.00 | 57.23 | DMPDAB Pd MAH: 0.09<br>mg Triisobutylphosphatrane: 0.07 uL P2-Et:<br>6.66 uL t-AmOH: 100.00 uL |
| G10 | 0.00 | 37.03 | RuPhos Pd G4: 0.17 mg P2-Et: 6.66 uL t-<br>AmOH: 100.00 uL                                     |
| G11 | 0.00 | 8.94  | [Pd(bippyPhos)(allyl)]OTf: 0.16 mg P2-Et:<br>6.66 uL t-AmOH: 100.00 uL                         |
| G12 | 0.00 | 25.50 | tBuXPhos Pd G3: 0.16 mg P2-Et: 6.66 uL t-<br>AmOH: 100.00 uL                                   |
| H1  | 0.00 | 34.66 | P(tBu) <sub>3</sub> Pd G4: 0.11 mg P2-Et: 6.66<br>uL dioxane: 100.00 uL                        |
| H2  | 0.00 | 43.98 | DMPDAB Pd MAH: 0.09<br>mg Brett/Ru/JackiePhos: 0.16 mg P2-Et:<br>6.66 uL dioxane: 100.00 uL    |
| H3  | 0.00 | 52.60 | DMPDAB Pd MAH: 0.09<br>mg Brett/C/JackiePhos: 0.15 mg P2-Et: 6.66<br>uL dioxane: 100.00 uL     |
| H4  | 0.00 | 67.22 | tBuBrettPhos Pd G3: 0.17 mg P2-Et: 6.66<br>uL dioxane: 100.00 uL                               |
| H5  | 0.00 | 17.49 | Ephos Pd G4: 0.18 mg P2-Et: 6.66<br>uL dioxane: 100.00 uL                                      |
| H6  | 0.00 | 32.09 | BrettPhos Pd G3: 0.18 mg P2-Et: 6.66<br>uL dioxane: 100.00 uL                                  |
| H7  | 0.00 | 49.79 | P(tBu) <sub>3</sub> Pd G4: 0.11 mg P2-Et: 6.66 uL t-<br>AmOH: 100.00 uL                        |
| H8  | 0.00 | 32.74 | DMPDAB Pd MAH: 0.09<br>mg Brett/Ru/JackiePhos: 0.16 mg P2-Et:<br>6.66 uL t-AmOH: 100.00 uL     |
| H9  | 0.00 | 34.61 | DMPDAB Pd MAH: 0.09<br>mg Brett/C/JackiePhos: 0.15 mg P2-Et: 6.66                              |

|     |      |       |                                                              |
|-----|------|-------|--------------------------------------------------------------|
|     |      |       | uL t-AmOH: 100.00 uL                                         |
| H10 | 0.00 | 13.34 | tBuBrettPhos Pd G3: 0.17 mg P2-Et: 6.66 uL t-AmOH: 100.00 uL |
| H11 | 0.00 | 44.97 | Ephos Pd G4: 0.18 mg P2-Et: 6.66 uL t-AmOH: 100.00 uL        |
| H12 | 0.00 | 55.14 | BrettPhos Pd G3: 0.18 mg P2-Et: 6.66 uL t-AmOH: 100.00 uL    |

Buchwald amide and oxygen screening kit (amide)

| Cell ID | Desired Product (%)                       | Reactant (%)             | Components                                                       |
|---------|-------------------------------------------|--------------------------|------------------------------------------------------------------|
|         | N-(4-methoxyphenyl)pyridine-3-carboxamide | NICOTINAMIDE (BT1703, N) |                                                                  |
|         | Max Resp:1890096.0                        | Max Resp:462573.8        |                                                                  |
|         | m/z:229                                   | m/z:123                  |                                                                  |
| C7      | 100.00                                    | 5.95                     | AdBrettPhos-Pd-G3: 0.20 mg Cs2CO3: 6.52 mg t-AmOH: 100.00 uL     |
| D10     | 76.86                                     | 5.68                     | RockPhos Pd G3: 0.17 mg Cs2CO3: 6.52 mg t-AmOH: 100.00 uL        |
| C8      | 76.43                                     | 5.97                     | AdBrettPhos-Pd-G3: 0.20 mg K3PO4: 4.25 mg t-AmOH: 100.00 uL      |
| D11     | 61.11                                     | 11.95                    | RockPhos Pd G3: 0.17 mg K3PO4: 4.25 mg t-AmOH: 100.00 uL         |
| A8      | 60.16                                     | 9.04                     | K3PO4: 4.25 mg tBuBrettPhos Pd G3: 0.17 mg t-AmOH: 100.00 uL     |
| D5      | 53.43                                     | 40.87                    | RockPhos Pd G3: 0.17 mg K3PO4: 4.25 mg dioxane: 100.00 uL        |
| A1      | 48.33                                     | 28.33                    | Cs2CO3: 6.52 mg tBuBrettPhos Pd G3: 0.17 mg dioxane: 100.00 uL   |
| G8      | 48.00                                     | 41.05                    | Me3(Ome)tBuXPhos Pd G3: 0.16 mg K3PO4: 4.25 mg t-AmOH: 100.00 uL |
| F7      | 30.31                                     | 50.45                    | tBuXPhos Pd G3: 0.16 mg Cs2CO3: 6.52 mg t-AmOH: 100.00 uL        |
| B8      | 29.27                                     | 64.04                    | K3PO4: 4.25 mg 4MetBuXPhos Pd G3: 0.17 mg t-AmOH: 100.00 uL      |
| A2      | 27.09                                     | 23.07                    | K3PO4: 4.25 mg tBuBrettPhos Pd G3: 0.17 mg dioxane: 100.00 uL    |
| D4      | 23.96                                     | 23.35                    | RockPhos Pd G3: 0.17 mg Cs2CO3:                                  |



|     |       |       |                                                                                   |
|-----|-------|-------|-----------------------------------------------------------------------------------|
|     |       |       | 6.52 mg dioxane: 100.00 uL                                                        |
| C2  | 22.39 | 22.84 | AdBrettPhos-Pd-G3: 0.20 mg K3PO4:<br>4.25 mg dioxane: 100.00 uL                   |
| B7  | 21.42 | 40.13 | Cs2CO3: 6.52 mg 4MetBuXPhos Pd<br>G3: 0.17 mg t-AmOH: 100.00 uL                   |
| A11 | 18.08 | 74.14 | BrettPhos Pd G4: 0.18 mg K3PO4:<br>4.25 mg t-AmOH: 100.00 uL                      |
| F8  | 16.39 | 36.04 | tBuXPhos Pd G3: 0.16 mg K3PO4: 4.25<br>mg t-AmOH: 100.00 uL                       |
| F10 | 14.54 | 98.04 | TrixiePhos Pd G3: 0.15 mg Cs2CO3:<br>6.52 mg t-AmOH: 100.00 uL                    |
| A9  | 13.41 | 63.75 | KOAc: 1.96 mg tBuBrettPhos Pd G3:<br>0.17 mg t-AmOH: 100.00 uL                    |
| A5  | 12.91 | 52.13 | BrettPhos Pd G4: 0.18 mg K3PO4:<br>4.25 mg dioxane: 100.00 uL                     |
| A4  | 11.11 | 33.31 | BrettPhos Pd G4: 0.18 mg Cs2CO3:<br>6.52 mg dioxane: 100.00 uL                    |
| C9  | 8.12  | 58.23 | AdBrettPhos-Pd-G3: 0.20 mg KOAc:<br>1.96 mg t-AmOH: 100.00 uL                     |
| F11 | 7.38  | 46.62 | TrixiePhos Pd G3: 0.15 mg K3PO4:<br>4.25 mg t-AmOH: 100.00 uL                     |
| A7  | 6.35  | 77.36 | Cs2CO3: 6.52 mg tBuBrettPhos Pd G3:<br>0.17 mg t-AmOH: 100.00 uL                  |
| C1  | 6.20  | 21.60 | AdBrettPhos-Pd-G3: 0.20 mg Cs2CO3:<br>6.52 mg dioxane: 100.00 uL                  |
| D12 | 6.00  | 52.77 | RockPhos Pd G3: 0.17 mg KOAc: 1.96<br>mg t-AmOH: 100.00 uL                        |
| G10 | 5.18  | 65.15 | DMPDAB-Pd-MAH: 0.09<br>mg tBuMePhos: 0.06 mg Cs2CO3:<br>6.52 mg t-AmOH: 100.00 uL |
| G1  | 4.64  | 22.05 | Me3(Ome)tBuXPhos Pd G3: 0.16<br>mg Cs2CO3: 6.52 mg dioxane: 100.00<br>uL          |
| A10 | 3.99  | 34.45 | BrettPhos Pd G4: 0.18 mg Cs2CO3:<br>6.52 mg t-AmOH: 100.00 uL                     |
| G9  | 3.28  | 77.64 | Me3(Ome)tBuXPhos Pd G3: 0.16<br>mg KOAc: 1.96 mg t-AmOH: 100.00 uL                |
| E4  | 2.74  | 38.26 | JosiPhos Pd G3: 0.19 mg Cs2CO3: 6.52<br>mg dioxane: 100.00 uL                     |
| H11 | 2.72  | 36.80 | Pd(allyl)Otf-BippyPhos: 0.16<br>mg K3PO4: 4.25 mg t-AmOH: 100.00                  |

|     |      |       | uL                                                                               |
|-----|------|-------|----------------------------------------------------------------------------------|
| A3  | 2.26 | 41.67 | KOAc: 1.96 mg tBuBrettPhos Pd G3:<br>0.17 mg dioxane: 100.00 uL                  |
| B9  | 2.24 | 60.71 | KOAc: 1.96 mg 4MetBuXPhos Pd G3:<br>0.17 mg t-AmOH: 100.00 uL                    |
| G11 | 2.05 | 48.82 | DMPDAB-Pd-MAH: 0.09<br>mg tBuMePhos: 0.06 mg K3PO4: 4.25<br>mg t-AmOH: 100.00 uL |
| H5  | 2.04 | 29.59 | Pd(allyl)Otf-BippyPhos: 0.16<br>mg K3PO4: 4.25 mg dioxane: 100.00<br>uL          |
| G2  | 1.77 | 28.00 | Me3(Ome)tBuXPhos Pd G3: 0.16<br>mg K3PO4: 4.25 mg dioxane: 100.00<br>uL          |
| C3  | 1.66 | 36.73 | AdBrettPhos-Pd-G3: 0.20 mg KOAc:<br>1.96 mg dioxane: 100.00 uL                   |
| F12 | 1.64 | 44.28 | TrixiePhos Pd G3: 0.15 mg KOAc: 1.96<br>mg t-AmOH: 100.00 uL                     |
| H4  | 1.61 | 57.46 | Pd(allyl)Otf-BippyPhos: 0.16<br>mg Cs2CO3: 6.52 mg dioxane: 100.00<br>uL         |
| F2  | 1.58 | 22.13 | tBuXPhos Pd G3: 0.16 mg K3PO4: 4.25<br>mg dioxane: 100.00 uL                     |
| B2  | 1.54 | 36.46 | K3PO4: 4.25 mg 4MetBuXPhos Pd G3:<br>0.17 mg dioxane: 100.00 uL                  |
| G7  | 1.53 | 36.06 | Me3(Ome)tBuXPhos Pd G3: 0.16<br>mg Cs2CO3: 6.52 mg t-AmOH: 100.00<br>uL          |
| F5  | 1.48 | 67.22 | TrixiePhos Pd G3: 0.15 mg K3PO4:<br>4.25 mg dioxane: 100.00 uL                   |
| E5  | 1.32 | 42.46 | JosiPhos Pd G3: 0.19 mg K3PO4: 4.25<br>mg dioxane: 100.00 uL                     |
| F1  | 1.29 | 26.48 | tBuXPhos Pd G3: 0.16 mg Cs2CO3:<br>6.52 mg dioxane: 100.00 uL                    |
| D6  | 1.27 | 65.55 | RockPhos Pd G3: 0.17 mg KOAc: 1.96<br>mg dioxane: 100.00 uL                      |
| F4  | 1.17 | 54.49 | TrixiePhos Pd G3: 0.15 mg Cs2CO3:<br>6.52 mg dioxane: 100.00 uL                  |
| F3  | 1.08 | 46.13 | tBuXPhos Pd G3: 0.16 mg KOAc: 1.96<br>mg dioxane: 100.00 uL                      |
| H12 | 0.97 | 54.09 | Pd(allyl)Otf-BippyPhos: 0.16<br>mg KOAc: 1.96 mg t-AmOH: 100.00 uL               |

|     |      |       |                                                                                                        |
|-----|------|-------|--------------------------------------------------------------------------------------------------------|
| B1  | 0.80 | 29.59 | Cs <sub>2</sub> CO <sub>3</sub> : 6.52 mg 4MetBuXPhos Pd G3: 0.17 mg dioxane: 100.00 uL                |
| G4  | 0.65 | 53.49 | DMPDAB-Pd-MAH: 0.09 mg tBuMePhos: 0.06 mg Cs <sub>2</sub> CO <sub>3</sub> : 6.52 mg dioxane: 100.00 uL |
| H8  | 0.62 | 45.69 | Xphos Pd G4: 0.17 mg K <sub>3</sub> PO <sub>4</sub> : 4.25 mg t-AmOH: 100.00 uL                        |
| E8  | 0.56 | 43.70 | JackiePhos Pd G3: 0.23 mg K <sub>3</sub> PO <sub>4</sub> : 4.25 mg t-AmOH: 100.00 uL                   |
| A6  | 0.00 | 48.88 | BrettPhos Pd G4: 0.18 mg KOAc: 1.96 mg dioxane: 100.00 uL                                              |
| A12 | 0.00 | 62.08 | BrettPhos Pd G4: 0.18 mg KOAc: 1.96 mg t-AmOH: 100.00 uL                                               |
| B3  | 0.00 | 46.65 | KOAc: 1.96 mg 4MetBuXPhos Pd G3: 0.17 mg dioxane: 100.00 uL                                            |
| B4  | 0.00 | 63.09 | XantPhos Pd G4: 0.19 mg Cs <sub>2</sub> CO <sub>3</sub> : 6.52 mg dioxane: 100.00 uL                   |
| B5  | 0.00 | 53.48 | XantPhos Pd G4: 0.19 mg K <sub>3</sub> PO <sub>4</sub> : 4.25 mg dioxane: 100.00 uL                    |
| B6  | 0.00 | 56.24 | XantPhos Pd G4: 0.19 mg KOAc: 1.96 mg dioxane: 100.00 uL                                               |
| B10 | 0.00 | 74.00 | XantPhos Pd G4: 0.19 mg Cs <sub>2</sub> CO <sub>3</sub> : 6.52 mg t-AmOH: 100.00 uL                    |
| B11 | 0.00 | 45.87 | XantPhos Pd G4: 0.19 mg K <sub>3</sub> PO <sub>4</sub> : 4.25 mg t-AmOH: 100.00 uL                     |
| B12 | 0.00 | 57.90 | XantPhos Pd G4: 0.19 mg KOAc: 1.96 mg t-AmOH: 100.00 uL                                                |
| C4  | 0.00 | 66.57 | DPPF Pd G3: 0.18 mg Cs <sub>2</sub> CO <sub>3</sub> : 6.52 mg dioxane: 100.00 uL                       |
| C5  | 0.00 | 58.17 | DPPF Pd G3: 0.18 mg K <sub>3</sub> PO <sub>4</sub> : 4.25 mg dioxane: 100.00 uL                        |
| C6  | 0.00 | 66.79 | DPPF Pd G3: 0.18 mg KOAc: 1.96 mg dioxane: 100.00 uL                                                   |
| C10 | 0.00 | 45.56 | DPPF Pd G3: 0.18 mg Cs <sub>2</sub> CO <sub>3</sub> : 6.52 mg t-AmOH: 100.00 uL                        |
| C11 | 0.00 | 43.68 | DPPF Pd G3: 0.18 mg K <sub>3</sub> PO <sub>4</sub> : 4.25 mg t-AmOH: 100.00 uL                         |
| C12 | 0.00 | 49.35 | DPPF Pd G3: 0.18 mg KOAc: 1.96 mg t-AmOH: 100.00 uL                                                    |
| D1  | 0.00 | 23.74 | rac-BINAP Pd G4: 0.20 mg Cs <sub>2</sub> CO <sub>3</sub> : 6.52 mg dioxane: 100.00 uL                  |

|     |      |       |                                                                                   |
|-----|------|-------|-----------------------------------------------------------------------------------|
| D2  | 0.00 | 32.29 | rac-BINAP Pd G4: 0.20 mg K3PO4:<br>4.25 mg dioxane: 100.00 uL                     |
| D3  | 0.00 | 43.94 | rac-BINAP Pd G4: 0.20 mg KOAc: 1.96<br>mg dioxane: 100.00 uL                      |
| D7  | 0.00 | 96.62 | rac-BINAP Pd G4: 0.20 mg Cs2CO3:<br>6.52 mg t-AmOH: 100.00 uL                     |
| D8  | 0.00 | 47.65 | rac-BINAP Pd G4: 0.20 mg K3PO4:<br>4.25 mg t-AmOH: 100.00 uL                      |
| D9  | 0.00 | 71.27 | rac-BINAP Pd G4: 0.20 mg KOAc: 1.96<br>mg t-AmOH: 100.00 uL                       |
| E1  | 0.00 | 61.27 | JackiePhos Pd G3: 0.23 mg Cs2CO3:<br>6.52 mg dioxane: 100.00 uL                   |
| E2  | 0.00 | 25.26 | JackiePhos Pd G3: 0.23 mg K3PO4:<br>4.25 mg dioxane: 100.00 uL                    |
| E3  | 0.00 | 35.17 | JackiePhos Pd G3: 0.23 mg KOAc: 1.96<br>mg dioxane: 100.00 uL                     |
| E6  | 0.00 | 56.99 | JosiPhos Pd G3: 0.19 mg KOAc: 1.96<br>mg dioxane: 100.00 uL                       |
| E7  | 0.00 | 75.57 | JackiePhos Pd G3: 0.23 mg Cs2CO3:<br>6.52 mg t-AmOH: 100.00 uL                    |
| E9  | 0.00 | 74.46 | JackiePhos Pd G3: 0.23 mg KOAc: 1.96<br>mg t-AmOH: 100.00 uL                      |
| E10 | 0.00 | 72.04 | JosiPhos Pd G3: 0.19 mg Cs2CO3: 6.52<br>mg t-AmOH: 100.00 uL                      |
| E11 | 0.00 | 53.16 | JosiPhos Pd G3: 0.19 mg K3PO4: 4.25<br>mg t-AmOH: 100.00 uL                       |
| E12 | 0.00 | 66.35 | JosiPhos Pd G3: 0.19 mg KOAc: 1.96<br>mg t-AmOH: 100.00 uL                        |
| F6  | 0.00 | 54.66 | TrixiePhos Pd G3: 0.15 mg KOAc: 1.96<br>mg dioxane: 100.00 uL                     |
| F9  | 0.00 | 0.00  | tBuXPhos Pd G3: 0.16 mg KOAc: 1.96<br>mg t-AmOH: 100.00 uL                        |
| G3  | 0.00 | 27.29 | Me3(Ome)tBuXPhos Pd G3: 0.16<br>mg KOAc: 1.96 mg dioxane: 100.00 uL               |
| G5  | 0.00 | 64.45 | DMPDAB-Pd-MAH: 0.09<br>mg tBuMePhos: 0.06 mg K3PO4: 4.25<br>mg dioxane: 100.00 uL |
| G6  | 0.00 | 38.86 | DMPDAB-Pd-MAH: 0.09<br>mg tBuMePhos: 0.06 mg KOAc: 1.96<br>mg dioxane: 100.00 uL  |
| G12 | 0.00 | 51.31 | DMPDAB-Pd-MAH: 0.09                                                               |

|     |      |        |                                                                         |
|-----|------|--------|-------------------------------------------------------------------------|
|     |      |        | mg tBuMePhos: 0.06 mg KOAc: 1.96<br>mg t-AmOH: 100.00 uL                |
| H1  | 0.00 | 22.23  | Xphos Pd G4: 0.17 mg Cs2CO3: 6.52<br>mg dioxane: 100.00 uL              |
| H2  | 0.00 | 33.75  | Xphos Pd G4: 0.17 mg K3PO4: 4.25<br>mg dioxane: 100.00 uL               |
| H3  | 0.00 | 40.40  | Xphos Pd G4: 0.17 mg KOAc: 1.96<br>mg dioxane: 100.00 uL                |
| H6  | 0.00 | 42.53  | Pd(allyl)Otf-BippyPhos: 0.16<br>mg KOAc: 1.96 mg dioxane: 100.00 uL     |
| H7  | 0.00 | 37.87  | Xphos Pd G4: 0.17 mg Cs2CO3: 6.52<br>mg t-AmOH: 100.00 uL               |
| H9  | 0.00 | 68.48  | Xphos Pd G4: 0.17 mg KOAc: 1.96<br>mg t-AmOH: 100.00 uL                 |
| H10 | 0.00 | 100.00 | Pd(allyl)Otf-BippyPhos: 0.16<br>mg Cs2CO3: 6.52 mg t-AmOH: 100.00<br>uL |

Buchwald amide and oxygen screening kit (oxygen)

| Cell ID | Desired Product (%)                                    | Reactant (%)                                | Components                                                               |
|---------|--------------------------------------------------------|---------------------------------------------|--------------------------------------------------------------------------|
|         | tert-butyl 3-(quinolin-6-yloxy)azetidine-1-carboxylate | tert-butyl 3-hydroxyazetidine-1-carboxylate |                                                                          |
|         | Max Resp:730117.8                                      | Max Resp:0.0                                |                                                                          |
|         | m/z:301                                                | m/z:174                                     |                                                                          |
| G1      | 100.00                                                 | 0.00                                        | Me3(Ome)tBuXPhos Pd G3: 0.16<br>mg Cs2CO3: 6.52 mg toluene: 100.00<br>uL |
| B1      | 91.17                                                  | 0.00                                        | Cs2CO3: 6.52 mg 4MetBuXPhos Pd<br>G3: 0.17 mg toluene: 100.00 uL         |
| A1      | 74.79                                                  | 0.00                                        | Cs2CO3: 6.52 mg tBuBrettPhos Pd<br>G3: 0.17 mg toluene: 100.00 uL        |
| D5      | 65.13                                                  | 0.00                                        | RockPhos Pd G3: 0.17 mg K3PO4:<br>4.25 mg toluene: 100.00 uL             |
| A2      | 62.43                                                  | 0.00                                        | K3PO4: 4.25 mg tBuBrettPhos Pd G3:<br>0.17 mg toluene: 100.00 uL         |
| H5      | 49.59                                                  | 0.00                                        | Pd(allyl)Otf-BippyPhos: 0.16<br>mg K3PO4: 4.25 mg toluene: 100.00        |

|     |       |      | uL                                                                      |
|-----|-------|------|-------------------------------------------------------------------------|
| F10 | 44.99 | 0.00 | TrixiePhos Pd G3: 0.15 mg Cs2CO3:<br>6.52 mg dioxane: 100.00 uL         |
| A4  | 34.18 | 0.00 | BrettPhos Pd G4: 0.18 mg Cs2CO3:<br>6.52 mg toluene: 100.00 uL          |
| F1  | 31.84 | 0.00 | tBuXPhos Pd G3: 0.16 mg Cs2CO3:<br>6.52 mg toluene: 100.00 uL           |
| C2  | 31.07 | 0.00 | AdBrettPhos-Pd-G3: 0.20 mg K3PO4:<br>4.25 mg toluene: 100.00 uL         |
| E1  | 29.38 | 0.00 | JackiePhos Pd G3: 0.23 mg Cs2CO3:<br>6.52 mg toluene: 100.00 uL         |
| C1  | 19.63 | 0.00 | AdBrettPhos-Pd-G3: 0.20<br>mg Cs2CO3: 6.52 mg toluene: 100.00<br>uL     |
| H11 | 18.69 | 0.00 | Pd(allyl)Otf-BippyPhos: 0.16<br>mg K3PO4: 4.25 mg dioxane: 100.00<br>uL |
| A7  | 14.09 | 0.00 | Cs2CO3: 6.52 mg tBuBrettPhos Pd<br>G3: 0.17 mg dioxane: 100.00 uL       |
| G8  | 14.02 | 0.00 | Me3(Ome)tBuXPhos Pd G3: 0.16<br>mg K3PO4: 4.25 mg dioxane: 100.00<br>uL |
| B7  | 13.95 | 0.00 | Cs2CO3: 6.52 mg 4MetBuXPhos Pd<br>G3: 0.17 mg dioxane: 100.00 uL        |
| D11 | 13.16 | 0.00 | RockPhos Pd G3: 0.17 mg K3PO4:<br>4.25 mg dioxane: 100.00 uL            |
| E10 | 11.82 | 0.00 | JosiPhos Pd G3: 0.19 mg Cs2CO3:<br>6.52 mg dioxane: 100.00 uL           |
| F4  | 8.81  | 0.00 | TrixiePhos Pd G3: 0.15 mg Cs2CO3:<br>6.52 mg toluene: 100.00 uL         |
| E2  | 8.17  | 0.00 | JackiePhos Pd G3: 0.23 mg K3PO4:<br>4.25 mg toluene: 100.00 uL          |
| E5  | 6.93  | 0.00 | JosiPhos Pd G3: 0.19 mg K3PO4: 4.25<br>mg toluene: 100.00 uL            |
| A5  | 6.38  | 0.00 | BrettPhos Pd G4: 0.18 mg K3PO4:<br>4.25 mg toluene: 100.00 uL           |
| H1  | 5.27  | 0.00 | Xphos Pd G4: 0.17 mg Cs2CO3: 6.52<br>mg toluene: 100.00 uL              |
| F2  | 3.96  | 0.00 | tBuXPhos Pd G3: 0.16 mg K3PO4:<br>4.25 mg toluene: 100.00 uL            |
| H4  | 3.40  | 0.00 | Pd(allyl)Otf-BippyPhos: 0.16                                            |

|     |      |      |                                                                                                          |
|-----|------|------|----------------------------------------------------------------------------------------------------------|
|     |      |      | mg Cs <sub>2</sub> CO <sub>3</sub> : 6.52 mg toluene: 100.00 uL                                          |
| F7  | 3.10 | 0.00 | tBuXPhos Pd G3: 0.16 mg Cs <sub>2</sub> CO <sub>3</sub> : 6.52 mg dioxane: 100.00 uL                     |
| C8  | 2.90 | 0.00 | AdBrettPhos-Pd-G3: 0.20 mg K <sub>3</sub> PO <sub>4</sub> : 4.25 mg dioxane: 100.00 uL                   |
| G2  | 2.77 | 0.00 | Me <sub>3</sub> (Ome)tBuXPhos Pd G3: 0.16 mg K <sub>3</sub> PO <sub>4</sub> : 4.25 mg toluene: 100.00 uL |
| C7  | 2.68 | 0.00 | AdBrettPhos-Pd-G3: 0.20 mg Cs <sub>2</sub> CO <sub>3</sub> : 6.52 mg dioxane: 100.00 uL                  |
| A8  | 2.64 | 0.00 | K <sub>3</sub> PO <sub>4</sub> : 4.25 mg tBuBrettPhos Pd G3: 0.17 mg dioxane: 100.00 uL                  |
| A3  | 2.12 | 0.00 | t-BuOK: 2.24 mg tBuBrettPhos Pd G3: 0.17 mg toluene: 100.00 uL                                           |
| A6  | 2.02 | 0.00 | BrettPhos Pd G4: 0.18 mg t-BuOK: 2.24 mg toluene: 100.00 uL                                              |
| D12 | 1.98 | 0.00 | RockPhos Pd G3: 0.17 mg t-BuOK: 2.24 mg dioxane: 100.00 uL                                               |
| G4  | 1.95 | 0.00 | DMPDAB-Pd-MAH: 0.09 mg tBuMePhos: 0.06 mg Cs <sub>2</sub> CO <sub>3</sub> : 6.52 mg toluene: 100.00 uL   |
| G11 | 1.92 | 0.00 | DMPDAB-Pd-MAH: 0.09 mg tBuMePhos: 0.06 mg K <sub>3</sub> PO <sub>4</sub> : 4.25 mg dioxane: 100.00 uL    |
| B8  | 1.92 | 0.00 | K <sub>3</sub> PO <sub>4</sub> : 4.25 mg 4MetBuXPhos Pd G3: 0.17 mg dioxane: 100.00 uL                   |
| B2  | 1.90 | 0.00 | K <sub>3</sub> PO <sub>4</sub> : 4.25 mg 4MetBuXPhos Pd G3: 0.17 mg toluene: 100.00 uL                   |
| D4  | 1.85 | 0.00 | RockPhos Pd G3: 0.17 mg Cs <sub>2</sub> CO <sub>3</sub> : 6.52 mg toluene: 100.00 uL                     |
| D1  | 1.45 | 0.00 | rac-BINAP Pd G4: 0.20 mg Cs <sub>2</sub> CO <sub>3</sub> : 6.52 mg toluene: 100.00 uL                    |
| G10 | 1.44 | 0.00 | DMPDAB-Pd-MAH: 0.09 mg tBuMePhos: 0.06 mg Cs <sub>2</sub> CO <sub>3</sub> : 6.52 mg dioxane: 100.00 uL   |
| A9  | 0.00 | 0.00 | t-BuOK: 2.24 mg tBuBrettPhos Pd G3: 0.17 mg dioxane: 100.00 uL                                           |
| A10 | 0.00 | 0.00 | BrettPhos Pd G4: 0.18 mg Cs <sub>2</sub> CO <sub>3</sub> : 6.52 mg dioxane: 100.00 uL                    |
| A11 | 0.00 | 0.00 | BrettPhos Pd G4: 0.18 mg K <sub>3</sub> PO <sub>4</sub> :                                                |

|     |      |      |                                                                                         |
|-----|------|------|-----------------------------------------------------------------------------------------|
|     |      |      | 4.25 mg dioxane: 100.00 uL                                                              |
| A12 | 0.00 | 0.00 | BrettPhos Pd G4: 0.18 mg t-BuOK:<br>2.24 mg dioxane: 100.00 uL                          |
| B3  | 0.00 | 0.00 | t-BuOK: 2.24 mg 4MetBuXPhos Pd<br>G3: 0.17 mg toluene: 100.00 uL                        |
| B4  | 0.00 | 0.00 | XantPhos Pd G4: 0.19 mg Cs <sub>2</sub> CO <sub>3</sub> :<br>6.52 mg toluene: 100.00 uL |
| B5  | 0.00 | 0.00 | XantPhos Pd G4: 0.19 mg K <sub>3</sub> PO <sub>4</sub> :<br>4.25 mg toluene: 100.00 uL  |
| B6  | 0.00 | 0.00 | XantPhos Pd G4: 0.19 mg t-BuOK:<br>2.24 mg toluene: 100.00 uL                           |
| B9  | 0.00 | 0.00 | T-BuOK: 2.24 mg 4MetBuXPhos Pd<br>G3: 0.17 mg dioxane: 100.00 uL                        |
| B10 | 0.00 | 0.00 | XantPhos Pd G4: 0.19 mg Cs <sub>2</sub> CO <sub>3</sub> :<br>6.52 mg dioxane: 100.00 uL |
| B11 | 0.00 | 0.00 | XantPhos Pd G4: 0.19 mg K <sub>3</sub> PO <sub>4</sub> :<br>4.25 mg dioxane: 100.00 uL  |
| B12 | 0.00 | 0.00 | XantPhos Pd G4: 0.19 mg t-BuOK:<br>2.24 mg dioxane: 100.00 uL                           |
| C3  | 0.00 | 0.00 | AdBrettPhos-Pd-G3: 0.20 mg t-BuOK:<br>2.24 mg toluene: 100.00 uL                        |
| C4  | 0.00 | 0.00 | DPPF Pd G3: 0.18 mg Cs <sub>2</sub> CO <sub>3</sub> : 6.52<br>mg toluene: 100.00 uL     |
| C5  | 0.00 | 0.00 | DPPF Pd G3: 0.18 mg K <sub>3</sub> PO <sub>4</sub> : 4.25<br>mg toluene: 100.00 uL      |
| C6  | 0.00 | 0.00 | DPPF Pd G3: 0.18 mg t-BuOK: 2.24<br>mg toluene: 100.00 uL                               |
| C9  | 0.00 | 0.00 | AdBrettPhos-Pd-G3: 0.20 mg t-BuOK:<br>2.24 mg dioxane: 100.00 uL                        |
| C10 | 0.00 | 0.00 | DPPF Pd G3: 0.18 mg Cs <sub>2</sub> CO <sub>3</sub> : 6.52<br>mg dioxane: 100.00 uL     |
| C11 | 0.00 | 0.00 | DPPF Pd G3: 0.18 mg K <sub>3</sub> PO <sub>4</sub> : 4.25<br>mg dioxane: 100.00 uL      |
| C12 | 0.00 | 0.00 | DPPF Pd G3: 0.18 mg t-BuOK: 2.24<br>mg dioxane: 100.00 uL                               |
| D2  | 0.00 | 0.00 | rac-BINAP Pd G4: 0.20 mg K <sub>3</sub> PO <sub>4</sub> :<br>4.25 mg toluene: 100.00 uL |
| D3  | 0.00 | 0.00 | rac-BINAP Pd G4: 0.20 mg t-BuOK:<br>2.24 mg toluene: 100.00 uL                          |
| D6  | 0.00 | 0.00 | RockPhos Pd G3: 0.17 mg t-BuOK:<br>2.24 mg toluene: 100.00 uL                           |



|     |      |      |                                                                                           |
|-----|------|------|-------------------------------------------------------------------------------------------|
| D7  | 0.00 | 0.00 | rac-BINAP Pd G4: 0.20 mg Cs <sub>2</sub> CO <sub>3</sub> :<br>6.52 mg dioxane: 100.00 uL  |
| D8  | 0.00 | 0.00 | rac-BINAP Pd G4: 0.20 mg K <sub>3</sub> PO <sub>4</sub> :<br>4.25 mg dioxane: 100.00 uL   |
| D9  | 0.00 | 0.00 | rac-BINAP Pd G4: 0.20 mg t-BuOK:<br>2.24 mg dioxane: 100.00 uL                            |
| D10 | 0.00 | 0.00 | RockPhos Pd G3: 0.17 mg Cs <sub>2</sub> CO <sub>3</sub> :<br>6.52 mg dioxane: 100.00 uL   |
| E3  | 0.00 | 0.00 | JackiePhos Pd G3: 0.23 mg t-BuOK:<br>2.24 mg toluene: 100.00 uL                           |
| E4  | 0.00 | 0.00 | JosiPhos Pd G3: 0.19 mg Cs <sub>2</sub> CO <sub>3</sub> :<br>6.52 mg toluene: 100.00 uL   |
| E6  | 0.00 | 0.00 | JosiPhos Pd G3: 0.19 mg t-BuOK: 2.24<br>mg toluene: 100.00 uL                             |
| E7  | 0.00 | 0.00 | JackiePhos Pd G3: 0.23 mg Cs <sub>2</sub> CO <sub>3</sub> :<br>6.52 mg dioxane: 100.00 uL |
| E8  | 0.00 | 0.00 | JackiePhos Pd G3: 0.23 mg K <sub>3</sub> PO <sub>4</sub> :<br>4.25 mg dioxane: 100.00 uL  |
| E9  | 0.00 | 0.00 | JackiePhos Pd G3: 0.23 mg t-BuOK:<br>2.24 mg dioxane: 100.00 uL                           |
| E11 | 0.00 | 0.00 | JosiPhos Pd G3: 0.19 mg K <sub>3</sub> PO <sub>4</sub> : 4.25<br>mg dioxane: 100.00 uL    |
| E12 | 0.00 | 0.00 | JosiPhos Pd G3: 0.19 mg t-BuOK: 2.24<br>mg dioxane: 100.00 uL                             |
| F3  | 0.00 | 0.00 | tBuXPhos Pd G3: 0.16 mg t-BuOK:<br>2.24 mg toluene: 100.00 uL                             |
| F5  | 0.00 | 0.00 | TrixiePhos Pd G3: 0.15 mg K <sub>3</sub> PO <sub>4</sub> :<br>4.25 mg toluene: 100.00 uL  |
| F6  | 0.00 | 0.00 | TrixiePhos Pd G3: 0.15 mg t-BuOK:<br>2.24 mg toluene: 100.00 uL                           |
| F8  | 0.00 | 0.00 | tBuXPhos Pd G3: 0.16 mg K <sub>3</sub> PO <sub>4</sub> :<br>4.25 mg dioxane: 100.00 uL    |
| F9  | 0.00 | 0.00 | tBuXPhos Pd G3: 0.16 mg t-BuOK:<br>2.24 mg dioxane: 100.00 uL                             |
| F11 | 0.00 | 0.00 | TrixiePhos Pd G3: 0.15 mg K <sub>3</sub> PO <sub>4</sub> :<br>4.25 mg dioxane: 100.00 uL  |
| F12 | 0.00 | 0.00 | TrixiePhos Pd G3: 0.15 mg t-BuOK:<br>2.24 mg dioxane: 100.00 uL                           |
| G3  | 0.00 | 0.00 | Me <sub>3</sub> (Ome)tBuXPhos Pd G3: 0.16<br>mg t-BuOK: 2.24 mg toluene: 100.00<br>uL     |

|     |      |      |                                                                              |
|-----|------|------|------------------------------------------------------------------------------|
| G5  | 0.00 | 0.00 | DMPDAB-Pd-MAH: 0.09 mg tBuMePhos: 0.06 mg K3PO4: 4.25 mg toluene: 100.00 uL  |
| G6  | 0.00 | 0.00 | DMPDAB-Pd-MAH: 0.09 mg tBuMePhos: 0.06 mg t-BuOK: 2.24 mg toluene: 100.00 uL |
| G7  | 0.00 | 0.00 | Me3(Ome)tBuXPhos Pd G3: 0.16 mg Cs2CO3: 6.52 mg dioxane: 100.00 uL           |
| G9  | 0.00 | 0.00 | Me3(Ome)tBuXPhos Pd G3: 0.16 mg t-BuOK: 2.24 mg dioxane: 100.00 uL           |
| G12 | 0.00 | 0.00 | DMPDAB-Pd-MAH: 0.09 mg tBuMePhos: 0.06 mg t-BuOK: 2.24 mg dioxane: 100.00 uL |
| H2  | 0.00 | 0.00 | Xphos Pd G4: 0.17 mg K3PO4: 4.25 mg toluene: 100.00 uL                       |
| H3  | 0.00 | 0.00 | Xphos Pd G4: 0.17 mg t-BuOK: 2.24 mg toluene: 100.00 uL                      |
| H6  | 0.00 | 0.00 | Pd(allyl)Otf-BippyPhos: 0.16 mg t-BuOK: 2.24 mg toluene: 100.00 uL           |
| H7  | 0.00 | 0.00 | Xphos Pd G4: 0.17 mg Cs2CO3: 6.52 mg dioxane: 100.00 uL                      |
| H8  | 0.00 | 0.00 | Xphos Pd G4: 0.17 mg K3PO4: 4.25 mg dioxane: 100.00 uL                       |
| H9  | 0.00 | 0.00 | Xphos Pd G4: 0.17 mg t-BuOK: 2.24 mg dioxane: 100.00 uL                      |
| H10 | 0.00 | 0.00 | Pd(allyl)Otf-BippyPhos: 0.16 mg Cs2CO3: 6.52 mg dioxane: 100.00 uL           |
| H12 | 0.00 | 0.00 | Pd(allyl)Otf-BippyPhos: 0.16 mg t-BuOK: 2.24 mg dioxane: 100.00 uL           |

S<sub>N</sub>Ar screening kit

|         |                                                |                                                                            |            |
|---------|------------------------------------------------|----------------------------------------------------------------------------|------------|
| Cell ID | Desired Product (%)                            | Reactant (%)                                                               | Components |
|         | methyl 7-(benzyloxy)-1H-indazole-4-carboxylate | 1H-INDAZOLE-4-CARBOXYLIC ACID, 7-FLUORO-, METHYL ESTER (BT301412,FRIDGE F) |            |
|         | Max Resp:365728.1                              | Max Resp:429213.8                                                          |            |

|     | m/z:281 | m/z:193 |                                                       |
|-----|---------|---------|-------------------------------------------------------|
| F10 | 100.00  | 1.31    | CsF: 0.60 mg KHMDS: 7.98<br>mg NMP: 100.00 uL         |
| F1  | 59.54   | 0.00    | No ligand: 0.00 mg KHMDS: 7.98<br>mg DMF: 100.00 uL   |
| F9  | 5.63    | 0.00    | No ligand: 0.00 mg KHMDS: 7.98<br>mg NMP: 100.00 uL   |
| F2  | 3.93    | 4.65    | CsF: 0.60 mg KHMDS: 7.98<br>mg DMF: 100.00 uL         |
| H1  | 1.94    | 0.00    | No ligand: 0.00 mg T-BuOK: 4.49<br>mg DMF: 100.00 uL  |
| F7  | 1.38    | 0.00    | No ligand: 0.00 mg KHMDS: 7.98<br>mg DMSO: 100.00 uL  |
| H2  | 1.01    | 2.09    | CsF: 0.60 mg T-BuOK: 4.49<br>mg DMF: 100.00 uL        |
| A1  | 0.00    | 100.00  | No ligand: 0.00 mg NEt3: 5.56<br>uL DMF: 100.00 uL    |
| A10 | 0.00    | 27.72   | CsF: 0.60 mg NEt3: 5.56<br>uL NMP: 100.00 uL          |
| A11 | 0.00    | 90.52   | No ligand: 0.00 mg NEt3: 5.56<br>uL CPME: 100.00 uL   |
| A12 | 0.00    | 48.05   | CsF: 0.60 mg NEt3: 5.56<br>uL CPME: 100.00 uL         |
| A2  | 0.00    | 15.56   | CsF: 0.60 mg NEt3: 5.56 uL DMF:<br>100.00 uL          |
| A3  | 0.00    | 11.85   | No ligand: 0.00 mg NEt3: 5.56<br>uL MeCN: 100.00 uL   |
| A4  | 0.00    | 7.28    | CsF: 0.60 mg NEt3: 5.56<br>uL MeCN: 100.00 uL         |
| A5  | 0.00    | 73.52   | No ligand: 0.00 mg NEt3: 5.56<br>uL t-AmOH: 100.00 uL |
| A6  | 0.00    | 46.35   | CsF: 0.60 mg NEt3: 5.56 uL t-<br>AmOH: 100.00 uL      |
| A7  | 0.00    | 48.12   | No ligand: 0.00 mg NEt3: 5.56<br>uL DMSO: 100.00 uL   |

|     |      |       |                                                      |
|-----|------|-------|------------------------------------------------------|
| A8  | 0.00 | 26.24 | CsF: 0.60 mg NEt3: 5.56<br>uL DMSO: 100.00 uL        |
| A9  | 0.00 | 74.50 | No ligand: 0.00 mg NEt3: 5.56<br>uL NMP: 100.00 uL   |
| B1  | 0.00 | 8.13  | No ligand: 0.00 mg DBU: 5.97<br>uL DMF: 100.00 uL    |
| B10 | 0.00 | 7.01  | CsF: 0.60 mg DBU: 5.97 uL NMP:<br>100.00 uL          |
| B11 | 0.00 | 35.35 | No ligand: 0.00 mg DBU: 5.97<br>uL CPME: 100.00 uL   |
| B12 | 0.00 | 41.44 | CsF: 0.60 mg DBU: 5.97<br>uL CPME: 100.00 uL         |
| B2  | 0.00 | 11.65 | CsF: 0.60 mg DBU: 5.97 uL DMF:<br>100.00 uL          |
| B3  | 0.00 | 7.10  | No ligand: 0.00 mg DBU: 5.97<br>uL MeCN: 100.00 uL   |
| B4  | 0.00 | 5.73  | CsF: 0.60 mg DBU: 5.97<br>uL MeCN: 100.00 uL         |
| B5  | 0.00 | 34.54 | No ligand: 0.00 mg DBU: 5.97<br>uL t-AmOH: 100.00 uL |
| B6  | 0.00 | 25.16 | CsF: 0.60 mg DBU: 5.97 uL t-<br>AmOH: 100.00 uL      |
| B7  | 0.00 | 5.27  | No ligand: 0.00 mg DBU: 5.97<br>uL DMSO: 100.00 uL   |
| B8  | 0.00 | 5.72  | CsF: 0.60 mg DBU: 5.97<br>uL DMSO: 100.00 uL         |
| B9  | 0.00 | 24.94 | No ligand: 0.00 mg DBU: 5.97<br>uL NMP: 100.00 uL    |
| C1  | 0.00 | 7.21  | No ligand: 0.00 mg TMG: 5.02<br>uL DMF: 100.00 uL    |
| C10 | 0.00 | 3.72  | CsF: 0.60 mg TMG: 5.02<br>uL NMP: 100.00 uL          |
| C11 | 0.00 | 32.31 | No ligand: 0.00 mg TMG: 5.02<br>uL CPME: 100.00 uL   |
| C12 | 0.00 | 6.17  | CsF: 0.60 mg TMG: 5.02<br>uL CPME: 100.00 uL         |
| C2  | 0.00 | 1.80  | CsF: 0.60 mg TMG: 5.02 uL DMF:<br>100.00 uL          |
| C3  | 0.00 | 5.44  | No ligand: 0.00 mg TMG: 5.02<br>uL MeCN: 100.00 uL   |
| C4  | 0.00 | 6.64  | CsF: 0.60 mg TMG: 5.02                               |

|     |      |       |                                                                               |
|-----|------|-------|-------------------------------------------------------------------------------|
|     |      |       | uL MeCN: 100.00 uL                                                            |
| C5  | 0.00 | 51.14 | No ligand: 0.00 mg TMG: 5.02 uL t-AmOH: 100.00 uL                             |
| C6  | 0.00 | 19.78 | CsF: 0.60 mg TMG: 5.02 uL t-AmOH: 100.00 uL                                   |
| C7  | 0.00 | 6.08  | No ligand: 0.00 mg TMG: 5.02 uL DMSO: 100.00 uL                               |
| C8  | 0.00 | 4.58  | CsF: 0.60 mg TMG: 5.02 uL DMSO: 100.00 uL                                     |
| C9  | 0.00 | 10.91 | No ligand: 0.00 mg TMG: 5.02 uL NMP: 100.00 uL                                |
| D1  | 0.00 | 50.69 | No ligand: 0.00 mg DIPEA: 6.97 uL DMF: 100.00 uL                              |
| D10 | 0.00 | 26.08 | CsF: 0.60 mg DIPEA: 6.97 uL NMP: 100.00 uL                                    |
| D11 | 0.00 | 34.54 | No ligand: 0.00 mg DIPEA: 6.97 uL CPME: 100.00 uL                             |
| D12 | 0.00 | 34.17 | CsF: 0.60 mg DIPEA: 6.97 uL CPME: 100.00 uL                                   |
| D2  | 0.00 | 21.84 | CsF: 0.60 mg DIPEA: 6.97 uL DMF: 100.00 uL                                    |
| D3  | 0.00 | 25.80 | No ligand: 0.00 mg DIPEA: 6.97 uL MeCN: 100.00 uL                             |
| D4  | 0.00 | 6.78  | CsF: 0.60 mg DIPEA: 6.97 uL MeCN: 100.00 uL                                   |
| D5  | 0.00 | 34.01 | No ligand: 0.00 mg DIPEA: 6.97 uL t-AmOH: 100.00 uL                           |
| D6  | 0.00 | 29.41 | CsF: 0.60 mg DIPEA: 6.97 uL t-AmOH: 100.00 uL                                 |
| D7  | 0.00 | 23.00 | No ligand: 0.00 mg DIPEA: 6.97 uL DMSO: 100.00 uL                             |
| D8  | 0.00 | 38.42 | CsF: 0.60 mg DIPEA: 6.97 uL DMSO: 100.00 uL                                   |
| D9  | 0.00 | 47.48 | No ligand: 0.00 mg DIPEA: 6.97 uL NMP: 100.00 uL                              |
| E1  | 0.00 | 33.77 | No ligand: 0.00 mg Cs <sub>2</sub> CO <sub>3</sub> : 13.03 mg DMF: 100.00 uL  |
| E10 | 0.00 | 67.12 | CsF: 0.60 mg Cs <sub>2</sub> CO <sub>3</sub> : 13.03 mg NMP: 100.00 uL        |
| E11 | 0.00 | 0.00  | No ligand: 0.00 mg Cs <sub>2</sub> CO <sub>3</sub> : 13.03 mg CPME: 100.00 uL |

|     |      |       |                                                                                 |
|-----|------|-------|---------------------------------------------------------------------------------|
| E12 | 0.00 | 6.04  | CsF: 0.60 mg Cs <sub>2</sub> CO <sub>3</sub> : 13.03 mg CPME: 100.00 uL         |
| E2  | 0.00 | 42.28 | CsF: 0.60 mg Cs <sub>2</sub> CO <sub>3</sub> : 13.03 mg DMF: 100.00 uL          |
| E3  | 0.00 | 3.02  | No ligand: 0.00 mg Cs <sub>2</sub> CO <sub>3</sub> : 13.03 mg MeCN: 100.00 uL   |
| E4  | 0.00 | 4.09  | CsF: 0.60 mg Cs <sub>2</sub> CO <sub>3</sub> : 13.03 mg MeCN: 100.00 uL         |
| E5  | 0.00 | 6.22  | No ligand: 0.00 mg Cs <sub>2</sub> CO <sub>3</sub> : 13.03 mg t-AmOH: 100.00 uL |
| E6  | 0.00 | 7.57  | CsF: 0.60 mg Cs <sub>2</sub> CO <sub>3</sub> : 13.03 mg t-AmOH: 100.00 uL       |
| E7  | 0.00 | 47.25 | No ligand: 0.00 mg Cs <sub>2</sub> CO <sub>3</sub> : 13.03 mg DMSO: 100.00 uL   |
| E8  | 0.00 | 25.87 | CsF: 0.60 mg Cs <sub>2</sub> CO <sub>3</sub> : 13.03 mg DMSO: 100.00 uL         |
| E9  | 0.00 | 42.39 | No ligand: 0.00 mg Cs <sub>2</sub> CO <sub>3</sub> : 13.03 mg NMP: 100.00 uL    |
| F11 | 0.00 | 1.28  | No ligand: 0.00 mg KHMDS: 7.98 mg CPME: 100.00 uL                               |
| F12 | 0.00 | 0.00  | CsF: 0.60 mg KHMDS: 7.98 mg CPME: 100.00 uL                                     |
| F3  | 0.00 | 0.00  | No ligand: 0.00 mg KHMDS: 7.98 mg MeCN: 100.00 uL                               |
| F4  | 0.00 | 0.00  | CsF: 0.60 mg KHMDS: 7.98 mg MeCN: 100.00 uL                                     |
| F5  | 0.00 | 0.00  | No ligand: 0.00 mg KHMDS: 7.98 mg t-AmOH: 100.00 uL                             |
| F6  | 0.00 | 0.00  | CsF: 0.60 mg KHMDS: 7.98 mg t-AmOH: 100.00 uL                                   |
| F8  | 0.00 | 0.00  | CsF: 0.60 mg KHMDS: 7.98 mg DMSO: 100.00 uL                                     |
| G1  | 0.00 | 50.40 | No ligand: 0.00 mg K <sub>3</sub> PO <sub>4</sub> : 8.49 mg DMF: 100.00 uL      |
| G10 | 0.00 | 42.58 | CsF: 0.60 mg K <sub>3</sub> PO <sub>4</sub> : 8.49 mg NMP: 100.00 uL            |
| G11 | 0.00 | 4.56  | No ligand: 0.00 mg K <sub>3</sub> PO <sub>4</sub> : 8.49 mg CPME: 100.00 uL     |
| G12 | 0.00 | 2.03  | CsF: 0.60 mg K <sub>3</sub> PO <sub>4</sub> : 8.49 mg CPME: 100.00 uL           |
| G2  | 0.00 | 54.16 | CsF: 0.60 mg K <sub>3</sub> PO <sub>4</sub> : 8.49                              |

|     |      |       |                                                         |
|-----|------|-------|---------------------------------------------------------|
|     |      |       | mg DMF: 100.00 uL                                       |
| G3  | 0.00 | 1.40  | No ligand: 0.00 mg K3PO4: 8.49<br>mg MeCN: 100.00 uL    |
| G4  | 0.00 | 5.03  | CsF: 0.60 mg K3PO4: 8.49<br>mg MeCN: 100.00 uL          |
| G5  | 0.00 | 5.56  | No ligand: 0.00 mg K3PO4: 8.49<br>mg t-AmOH: 100.00 uL  |
| G6  | 0.00 | 0.00  | CsF: 0.60 mg K3PO4: 8.49 mg t-<br>AmOH: 100.00 uL       |
| G7  | 0.00 | 70.33 | No ligand: 0.00 mg K3PO4: 8.49<br>mg DMSO: 100.00 uL    |
| G8  | 0.00 | 41.70 | CsF: 0.60 mg K3PO4: 8.49<br>mg DMSO: 100.00 uL          |
| G9  | 0.00 | 66.47 | No ligand: 0.00 mg K3PO4: 8.49<br>mg NMP: 100.00 uL     |
| H10 | 0.00 | 0.00  | CsF: 0.60 mg T-BuOK: 4.49<br>mg NMP: 100.00 uL          |
| H11 | 0.00 | 0.00  | No ligand: 0.00 mg T-BuOK: 4.49<br>mg CPME: 100.00 uL   |
| H12 | 0.00 | 0.00  | CsF: 0.60 mg T-BuOK: 4.49<br>mg CPME: 100.00 uL         |
| H3  | 0.00 | 0.00  | No ligand: 0.00 mg T-BuOK: 4.49<br>mg MeCN: 100.00 uL   |
| H4  | 0.00 | 0.00  | CsF: 0.60 mg T-BuOK: 4.49<br>mg MeCN: 100.00 uL         |
| H5  | 0.00 | 0.00  | No ligand: 0.00 mg T-BuOK: 4.49<br>mg t-AmOH: 100.00 uL |
| H6  | 0.00 | 0.00  | CsF: 0.60 mg T-BuOK: 4.49 mg t-<br>AmOH: 100.00 uL      |
| H7  | 0.00 | 0.00  | No ligand: 0.00 mg T-BuOK: 4.49<br>mg DMSO: 100.00 uL   |
| H8  | 0.00 | 0.00  | CsF: 0.60 mg T-BuOK: 4.49<br>mg DMSO: 100.00 uL         |
| H9  | 0.00 | 0.00  | No ligand: 0.00 mg T-BuOK: 4.49<br>mg NMP: 100.00 uL    |
